# Supplementary material for: Can the solvent enhance the rate of chemical reactions through C–H/π interactions? insights from theory
Source: Royal Society of Chemistry journal article supplement (doi:10.1039/c9cp02646k), 2019-01-01
Supplement: c9cp02646k1.pdf [file c9cp02646k1.pdf]

## Supplementary Information

### Can the Solvent Enhance the Rate of Chemical Reactions through C-H/ $\pi$ Interactions? Insights from Theory

Kumar Vanka,<sup>\*a, b</sup> Shailja Jain<sup>a, b</sup>

<sup>a</sup>Physical and Materials Chemistry Division, CSIR-National Chemical Laboratory, Pune-411008, India

<sup>b</sup>Academy of Scientific and Innovative Research (AcSIR), New Delhi

E-mail: k.vanka@ncl.res.in

## Table of Contents

|                                                                                                                                                                                                                                                                                                                                                                                             |    |
|---------------------------------------------------------------------------------------------------------------------------------------------------------------------------------------------------------------------------------------------------------------------------------------------------------------------------------------------------------------------------------------------|----|
| <b>Introduction</b> .....                                                                                                                                                                                                                                                                                                                                                                   | 4  |
| <b>Scheme S1.</b> The proposed mechanism for the formation of the silepin complex in the presence of toluene.....                                                                                                                                                                                                                                                                           | 4  |
| <b>Computational Details</b> .....                                                                                                                                                                                                                                                                                                                                                          | 4  |
| <b>Results and Discussion</b> .....                                                                                                                                                                                                                                                                                                                                                         | 5  |
| <b>Fig. S1</b> <i>The starting (input) geometry</i> where toluene was added above the di-isopropyl phenyl ( <i>dipp</i> ) rings, for possible $\pi$ - $\pi$ stacking interactions. Hydrogen atoms (except in toluene) have been removed for the purpose of clarity.....                                                                                                                     | 5  |
| <b>Fig. S2</b> <i>The final (output) geometry</i> where toluene was added above the di-isopropyl phenyl ( <i>dipp</i> ) rings, for possible $\pi$ - $\pi$ stacking interactions. Hydrogen atoms (except in toluene) have been removed for the purpose of clarity.....                                                                                                                       | 6  |
| <b>Fig. S3</b> <i>The starting (input) geometry</i> where toluene was added at the silicon center, for the lone pair- $\pi$ interactions. Hydrogen atoms (except in toluene) have been removed for the purpose of clarity.....                                                                                                                                                              | 6  |
| <b>Fig. S4</b> <i>The final (output) geometry</i> where toluene was added at the silicon center, for lone pair- $\pi$ interactions. Hydrogen atoms (except in toluene) have been removed for the purpose of clarity.....                                                                                                                                                                    | 7  |
| <b>Fig. S5</b> <i>The starting (input) geometry</i> where toluene was added to the C-H of the methyl group of <i>dipp</i> , for CH/ $\pi$ interactions. Hydrogen atoms (except in toluene) have been removed for the purpose of clarity.....                                                                                                                                                | 7  |
| <b>Fig. S6</b> <i>The final (output) geometry</i> where toluene was added above the C-H of the methyl group of <i>dipp</i> , for CH/ $\pi$ interactions. Hydrogen atoms (except in toluene) have been removed for the purpose of clarity.....                                                                                                                                               | 8  |
| <b>Table S1</b> NBO results (second order perturbation energy E(2) in kcal/mol) for a) <b>Ts'_2</b> and b) <b>Ts_2</b> .....                                                                                                                                                                                                                                                                | 8  |
| <b>Fig. S7</b> The optimized geometries of the transition states, intermediates and product in the presence of two toluene molecules, where C-H/ $\pi$ non-covalent interaction between solvent-substrate and $\pi$ - $\pi$ stacking noncovalent interaction between solvent-solvent have been shown. Hydrogen atoms (except for toluene) have been removed for the purpose of clarity..... | 9  |
| <b>Table S2</b> NBO results (second order perturbation energy E(2) in kcal/mol) for <b>Ts_d</b> .....                                                                                                                                                                                                                                                                                       | 10 |
| <b>Fig. S8</b> The electronic energy profile ( $\Delta E$ in kcal/mol) for the formation of the silepin complex <b>B'</b> in the presence of toluene at the TPSS-D3/def2-TZVP//B3-lyp-D3/TZVP level of theory.....                                                                                                                                                                          | 11 |
| <b>Fig. S9</b> The electronic energy profile ( $\Delta E$ in kcal/mol) for the formation of the silepin complex <b>B'</b> in the absence of toluene at the TPSS-D3/def2-TZVP//B3-lyp-D3/TZVP level of theory.....                                                                                                                                                                           | 11 |
| <b>Fig. S10</b> The electronic energy profile ( $\Delta E$ in kcal/mol) for the formation of silepin complex <b>B'</b> in the presence of toluene at the TPSS-D3/def2-TZVP//M06-2x/TZVP level of theory.....                                                                                                                                                                                | 12 |
| <b>Fig. S11</b> The electronic energy profile ( $\Delta E$ in kcal/mol) for the formation of silepin complex <b>B'</b> in the absence of toluene at the TPSS-D3/def2-TZVP//M06-2x/TZVP level of theory.....                                                                                                                                                                                 | 13 |

**Fig. S12** The different snapshots for observed C-H/ $\pi$  interactions in the room temperature *ab initio* molecular dynamics simulations. a) Initial geometry (starting point of simulation) at 0.0 ps, b) after 3.0 ps, when the bond distance for two different C-H/ $\pi$  interactions, between the hydrogen atoms of C-H and the center of the  $\pi$  ring, are 2.82 Å and 3.05 Å, c) after 6.8 ps, when the bond distance for the C-H/ $\pi$  interaction is 2.3 Å, and d) after 8.6 ps, when the bond distance for the C-H/ $\pi$  interaction is 2.7 Å.....14

**Fig. S13** The different snapshots for observed C-H/ $\pi$  interactions in *ab initio* molecular dynamics simulations done at a temperature of 1000.0 K. a) Geometry at 0.0 ps, where the bond distance for C-H/ $\pi$  interaction between the hydrogen atoms of C-H and the center of the  $\pi$  ring is 3.29 Å b) after 0.85 ps, when the bond distance for C-H/ $\pi$  interactions is 3.52 Å c) after 1.7 ps, when C-H/ $\pi$  interaction is not observed d) after 2.2 ps, when the bond distance for the C-H/ $\pi$  interaction is 3.10 Å, and e) after 3.65 ps, when the bond distance for the C-H/ $\pi$  interaction is 2.8 Å.....15

**Fig. S14** The free energy profile for the slowest step of the CO<sub>2</sub> activation by the silepin complex without C-H/ $\pi$  interaction.....16

**Fig. S15** The free energy profile for the case where toluene is not involved in C-H/ $\pi$  interaction with the substrate (**Int'\_2**) for the slowest step of the CO<sub>2</sub> activation process by the silepin complex.....17

**Fig. S16** The free energy profile for the case where toluene is not involved in C-H/ $\pi$  interaction with the transition state (**Ts'\_5**) for the slowest step of the CO<sub>2</sub> activation process by the silepin complex.....18

**Fig. S17** The free energy profile for the case where toluene is not involved in C-H/ $\pi$  interaction with the product (**IV**) for the slowest step of the CO<sub>2</sub> activation process by the silepin complex.....19

**Fig. S18** The free energy profile for the case where toluene is involved in C-H/ $\pi$  interaction with the substrate (**Int'\_2**), transition state (**Ts'\_5**) and product (**Int'\_3**) for the slowest step of the CO<sub>2</sub> activation process by the silepin complex.....20

**Fig. S19** The optimized geometry of a structure that demonstrates the presence of C-H/O interactions between a silylene molecule and an explicit tetrahydrofuran (THF) solvent molecule.....21

XYZ coordinates of all the stationary points obtained after full optimization at the TPSS-D3/def2-TZVP.....21-

## Introduction

As discussed in the manuscript, in order to understand the orientation of toluene for the C-H/ $\pi$  interactions with the reactant and intermediate complexes, the 3-D Figures for Scheme 1 b) are provided below in Scheme S1.

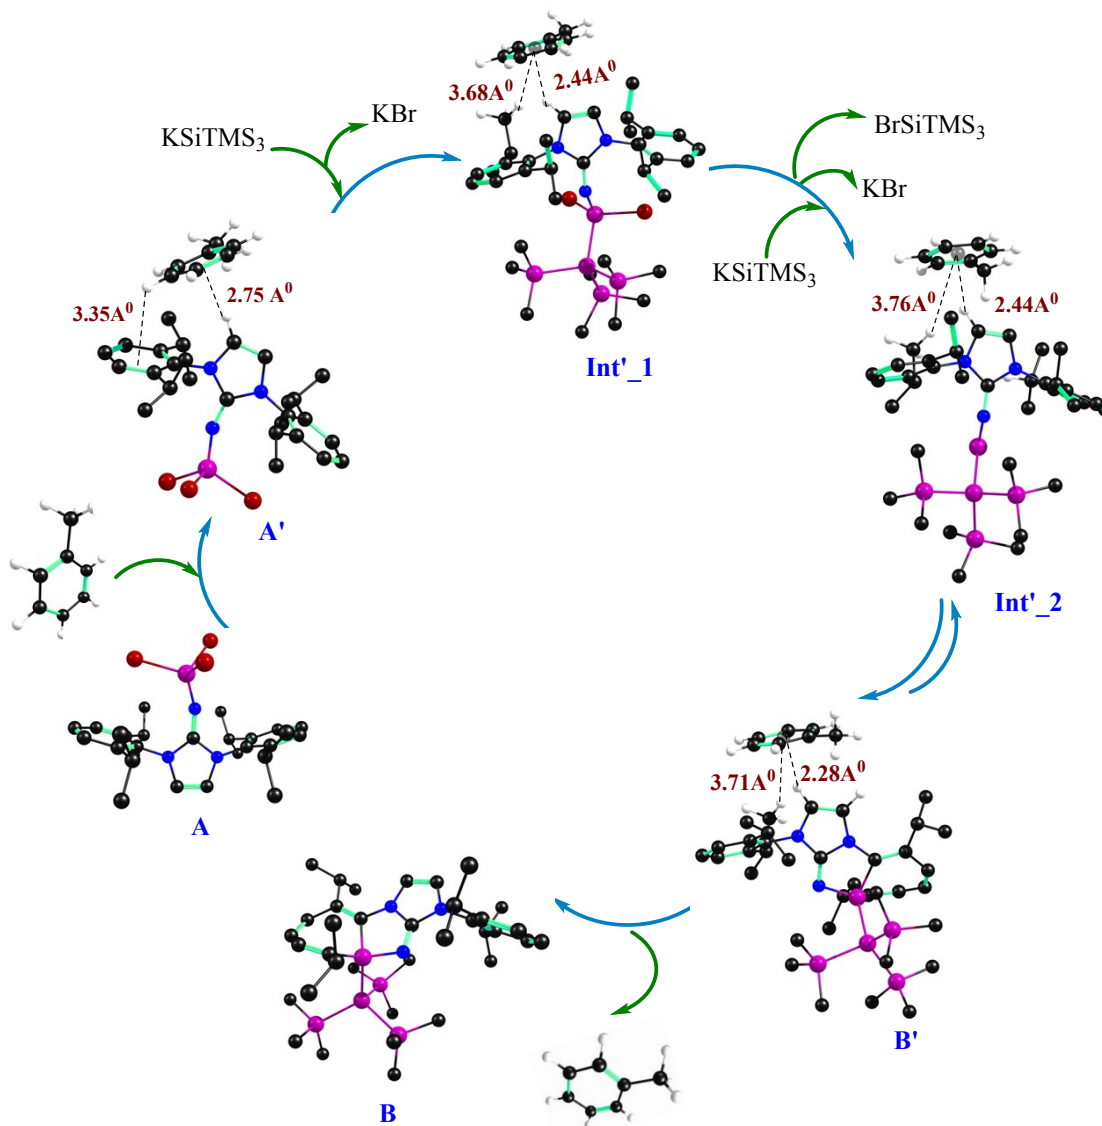

**Scheme S1.** The proposed mechanism for the formation of thesilepin complex in the presence of toluene.

## Results and Discussion

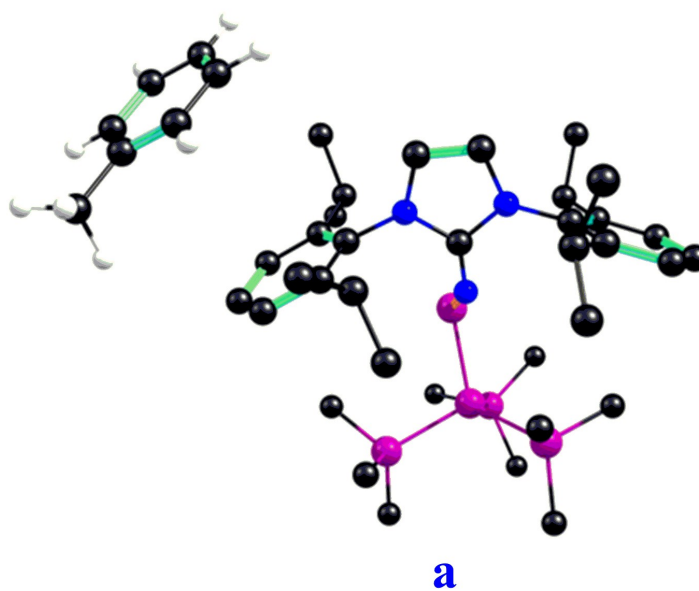

**Fig. S1** The starting (*input*) geometry where toluene was added above the di-isopropyl phenyl (*dipp*) rings, for possible  $\pi$ - $\pi$  stacking interactions. Hydrogen atoms (except in toluene) have been removed for the purpose of clarity.

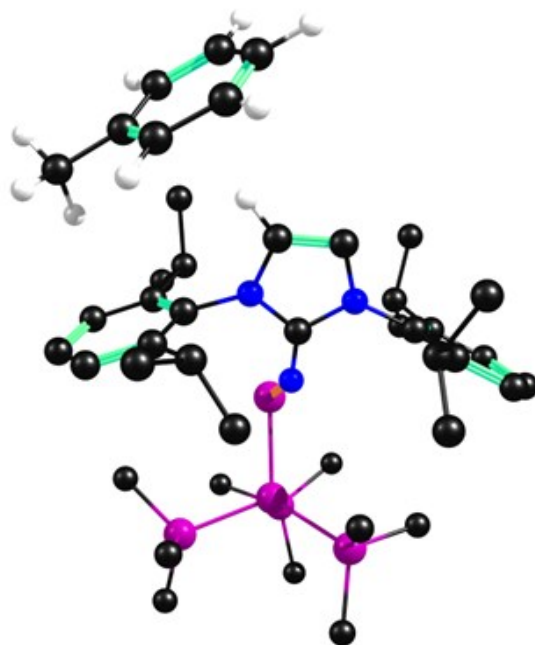

**b**

**Fig. S2** The final (output) geometry where toluene was added above the di-isopropyl phenyl (*dipp*) rings, for possible  $\pi$ - $\pi$  stacking interactions. Hydrogen atoms (except in toluene) have been removed for the purpose of clarity.

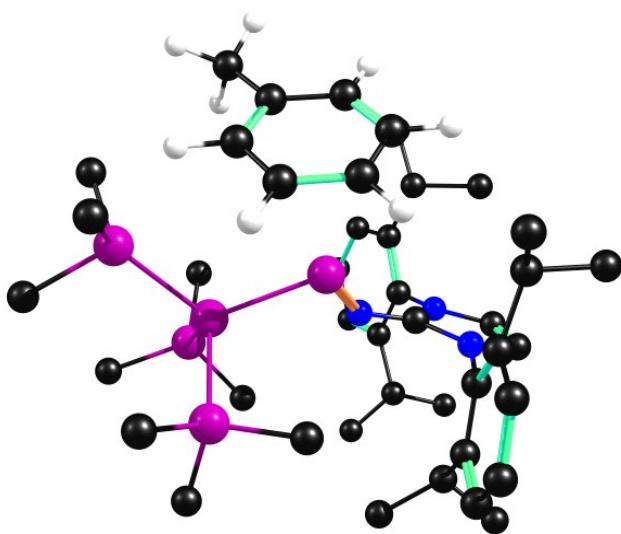

**c**

**Fig. S3** The starting (*input*) geometry where toluene was added at the silicon center, for the lone pair- $\pi$  interactions. Hydrogen atoms (except in toluene) have been removed for the purpose of clarity.

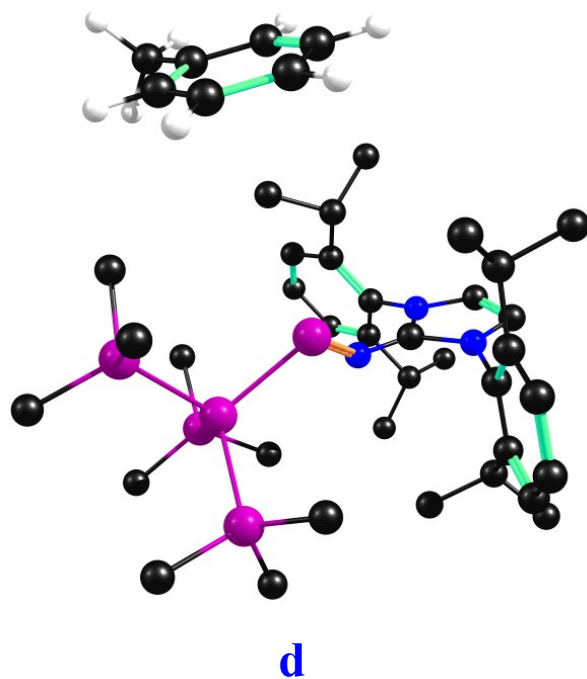

**Fig. S4** The final (*output*) geometry where toluene was added at the silicon center, for lone pair- $\pi$  interactions. Hydrogen atoms (except in toluene) have been removed for the purpose of clarity.

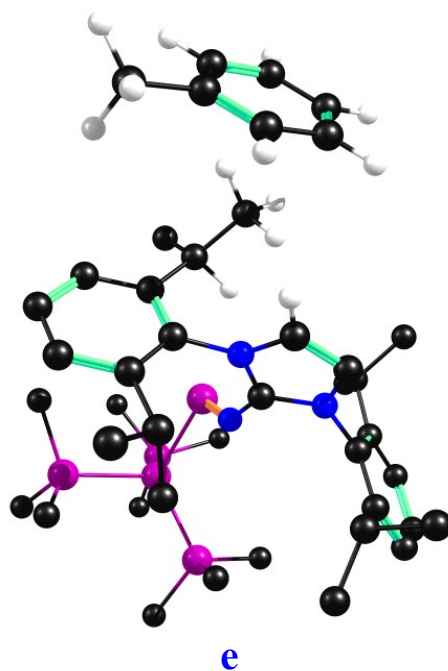

**Fig. S5** The starting (input) geometry where toluene was added the C-H of the methyl group of *dipp*, for CH/π interactions. Hydrogen atoms (except in toluene) have been removed for the purpose of clarity.

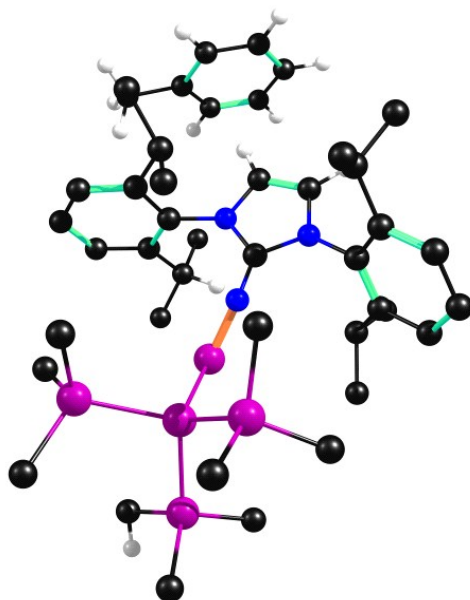

**f**

**Fig. S6** The final (output) geometry where toluene was added above the C-H of the methyl group of *dipp*, for CH/π interactions. Hydrogen atoms (except in toluene) have been removed for the purpose of clarity.

As discussed in manuscript the NBO analysis results are given in Table S1. Calculation suggest that (at B3-lyp/6-31g\*\* level of theory) interaction energy higher in presence of toluene than in the absence of toluene (see Table S1 below).

**Table S1** NBo results (second order perturbation energy E(2) in kcal/mol) for a) Ts'\_2 and b) Ts\_2.

| Donor           | Occupancy | Acceptor        | Occupancy | a) E (2) in the presence of toluene | b) E(2) in the absence of toluene |
|-----------------|-----------|-----------------|-----------|-------------------------------------|-----------------------------------|
| LP (1) Si<br>25 | 1.51439   | BD*(1) Br<br>26 | 0.61011   | 59.98                               | 26.08                             |
|                 |           | -Si 46          |           |                                     |                                   |
| LP (4) Br<br>33 | 1.65152   | LP* (2)Si<br>25 | 0.46303   | 130.30                              | 139.87                            |



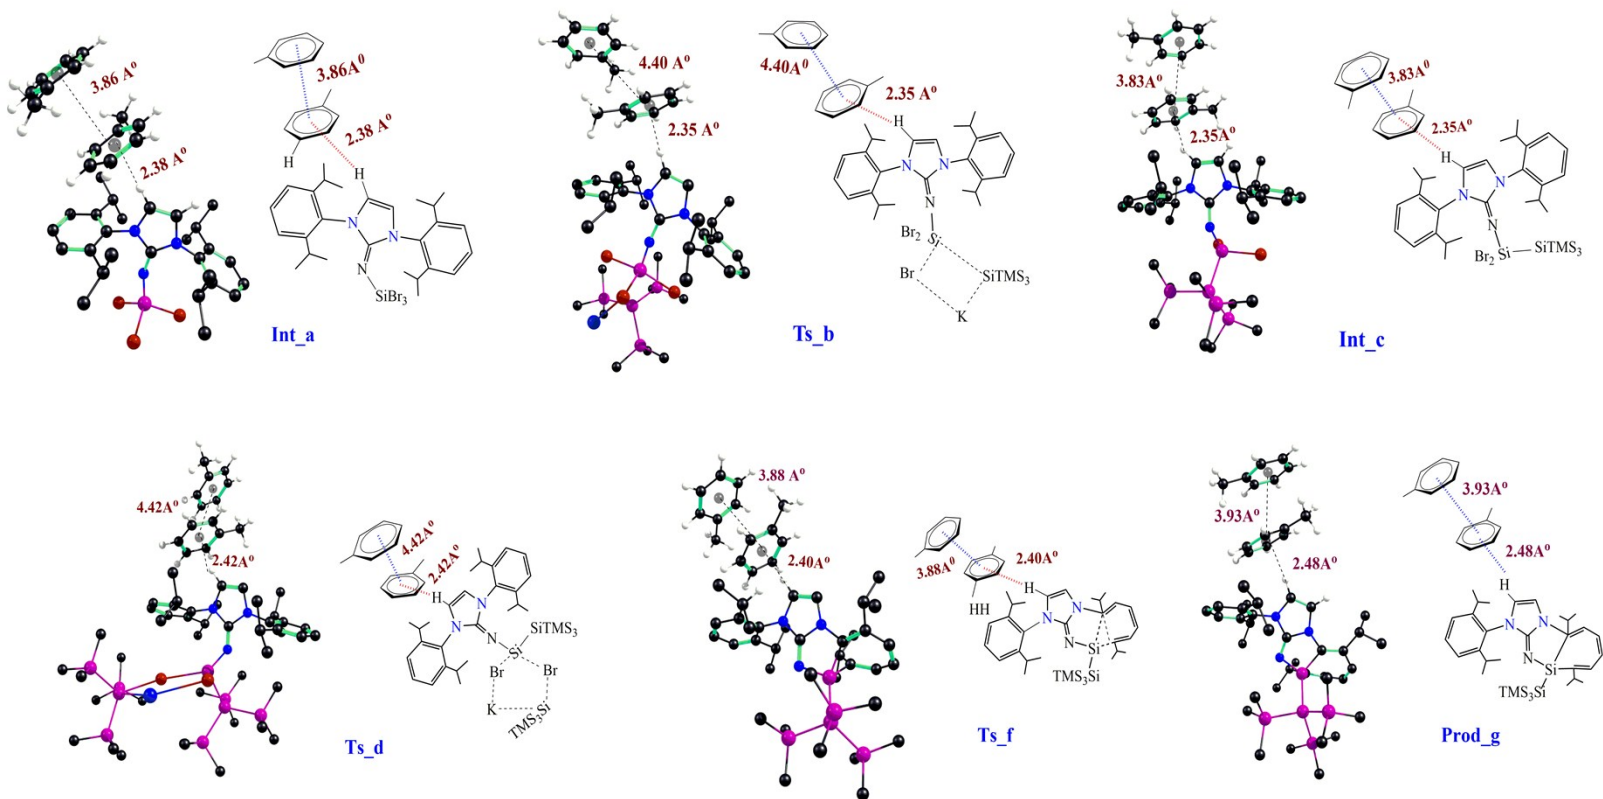

As discussed in the manuscript to check the effect of solvent-solvent interaction we have performed quantum chemical calculations for the silepin formation complex in the presence of two toluene. Optimized geometry, as well as ChemDraw figures for the transition states, intermediates and product in the presence of two explicit toluene molecules, have provided below.

**Fig. S7** The optimized geometries of the transition states, intermediates and product in the presence of two toluene molecules, where C-H/ $\pi$  non-covalent interaction between solvent-substrate and  $\pi$ - $\pi$  stacking noncovalent interaction between solvent-solvent have been shown. Hydrogen atoms (except for toluene) have been removed for the purpose of clarity.

To find the reason why energy barriers reduce in the presence of two toluene, we have performed NBO analysis at B3-lyp/6-31g\*\*/D-2 level of theory for **Ts\_d**. NBO results have summarized in Table S2.

**Table S2** NBO results (second order perturbation energy E(2) in kcal/mol) for **Ts\_d**.

| Donor           |         | Acceptor                  |         | E (2) in the presence of two toluene |
|-----------------|---------|---------------------------|---------|--------------------------------------|
| Occupancy       |         | Occupancy                 |         |                                      |
| LP (1) Si<br>25 | 1.2439  | BD*(1) Br<br>26<br>-Si 46 | 0.52361 | 60.98                                |
| LP (4) Br<br>33 | 1.65142 | LP* (2)Si<br>25           | 0.50131 | 143.12                               |

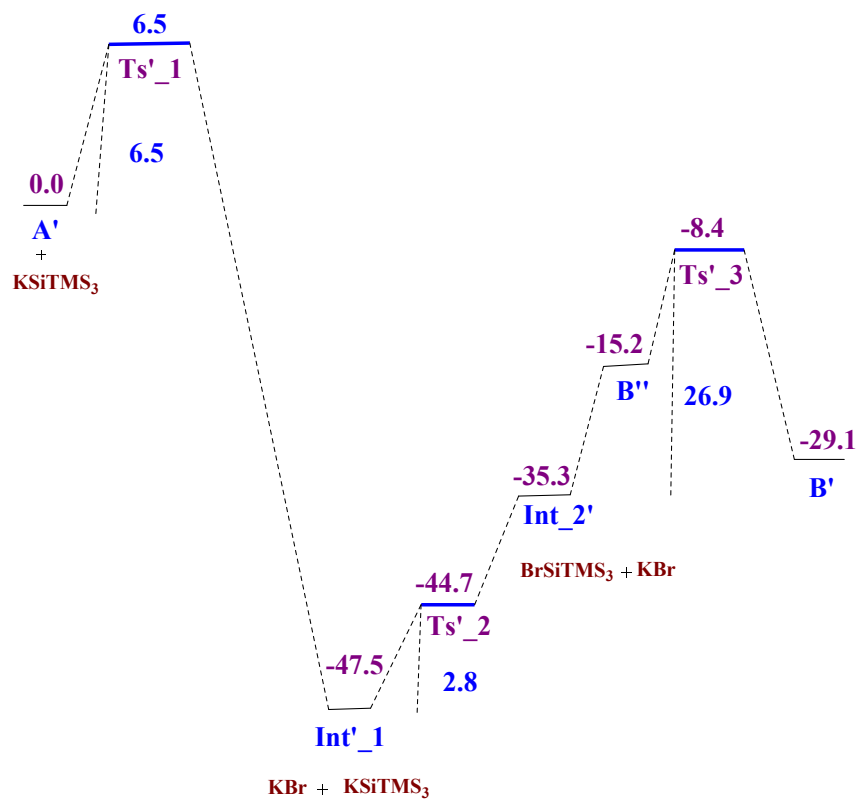

**Fig. S8** The electronic energy profile ( $\Delta E$  in kcal/mol) for the formation of the silepin complex **B'** in the presence of toluene at the TPSS-D3/def2-TZVP//B3-lyp-D3/TZVP level of theory.

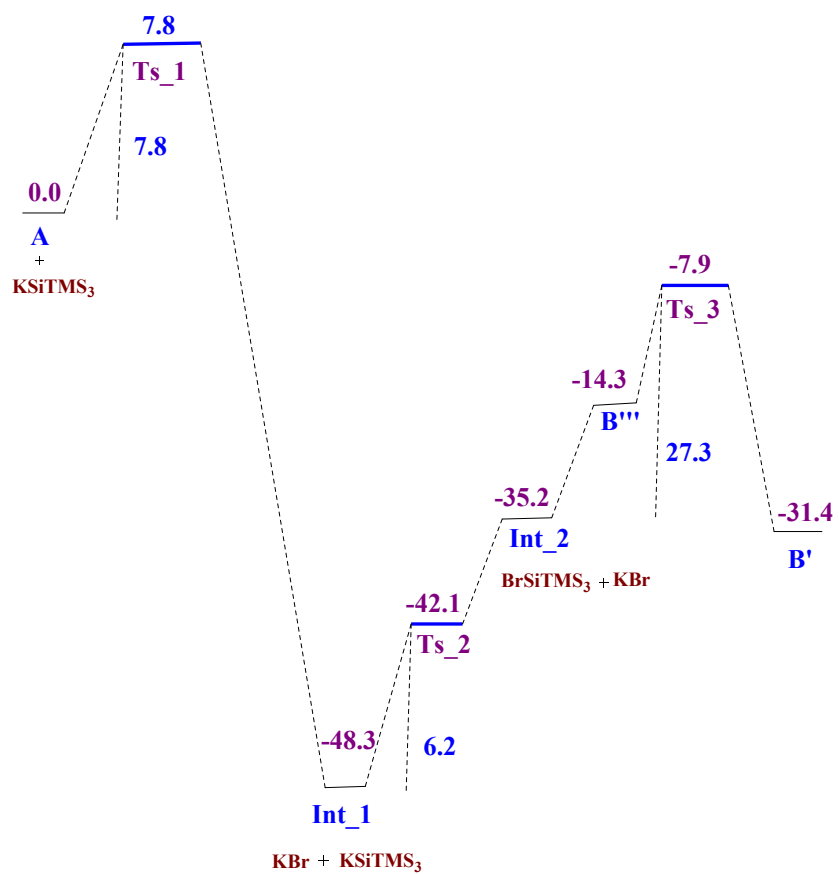

**Fig. S9** The electronic energy profile ( $\Delta E$  in kcal/mol) for the formation of the silepin complex **B'** in the absence of toluene at the TPSS-D3/def2-TZVP//B3-lyp-D3/TZVP level of theory.

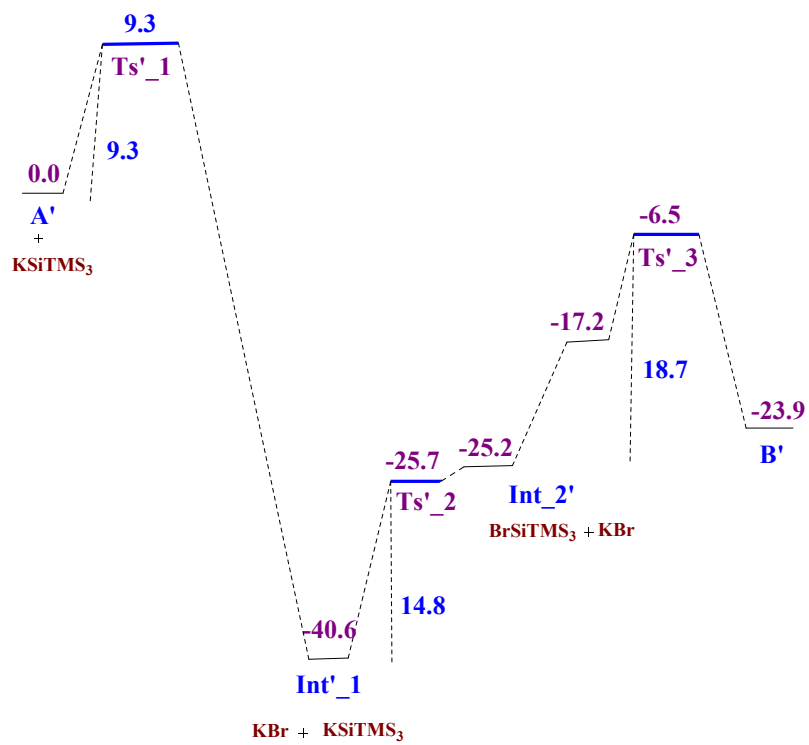

**Fig. S10** The electronic energy profile ( $\Delta E$  in kcal/mol) for the formation of silepin complex **B'** in the presence of toluene at the TPSS-D3/def2-TZVP//M06-2x/TZVP level of theory.

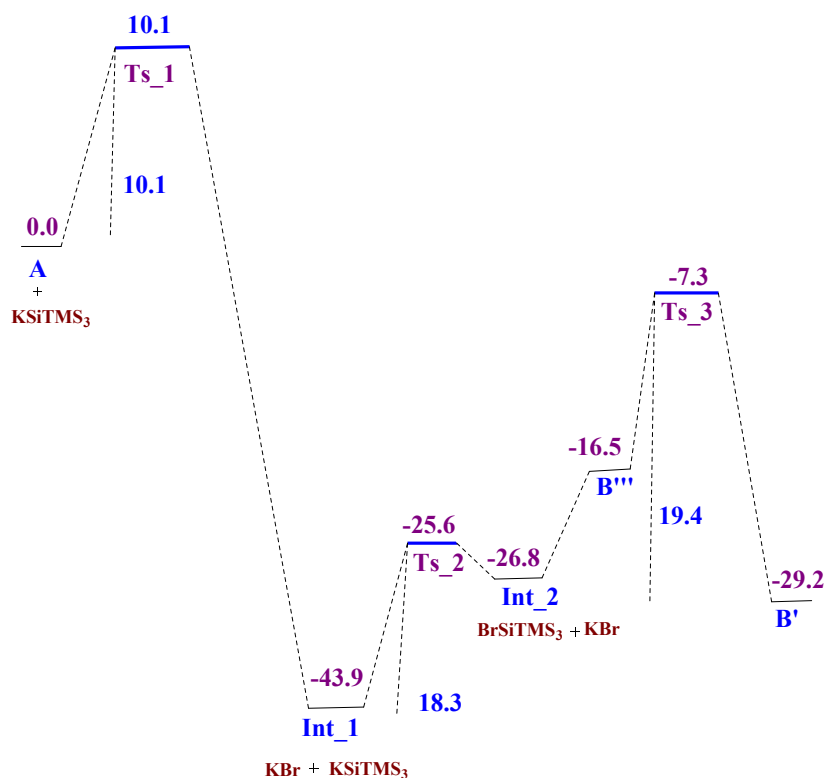

**Fig. S11** The electronic energy profile ( $\Delta E$  in kcal/mol) for the formation of silepin complex B' in the presence of toluene at the TPSS-D3/def2-TZVP//M06-2x/TZVP level of theory.

As discussed in manuscript, in order to further validate this result, we have employed *ab initio* molecular dynamics (AIMD) simulations at room temperature. We began by placing three toluene solvent molecules randomly around **Int\_2**. We observed that after 6182 steps (corresponding to about 3.0 picoseconds (ps)), only one interaction remained. This structure possessed the same C-H/ $\pi$  non-covalent interaction that had been found to be the most favourable (structure (i), discussed above) in the static DFT calculations. Moreover, once the interaction was formed, it remained for the duration of the AIMD simulation, up to 17,182 steps. The snapshots obtained from the simulations have been shown below in Fig. S12. These interesting results provide clear indication that the C-H/ $\pi$  noncovalent interaction between solvent and substrate indeed predominates over other non-covalent interactions in this system.

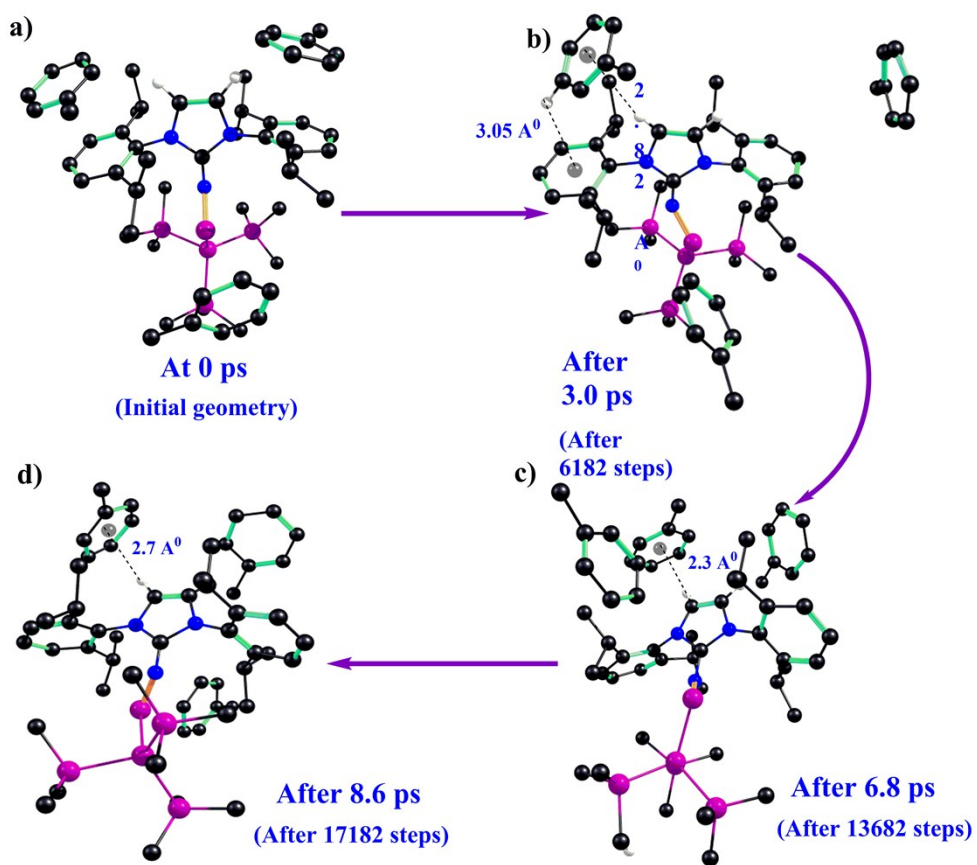

**Fig. S12** The different snapshots for observed C-H/ $\pi$  interactions in the room temperature *ab initio* molecular dynamics simulations. a) Initial geometry (starting point of simulation) at 0.0 ps, b) after 3.0 ps, when the bond distance for two different C-H/ $\pi$  interactions, between the hydrogen atoms of C-H and the center of the  $\pi$  ring, are 2.82 Å and 3.05 Å, c) after 6.8 ps, when the bond distance for the C-H/ $\pi$  interaction is 2.3 Å, and d) after 8.6 ps, when the bond distance for the C-H/ $\pi$  interaction is 2.7 Å.

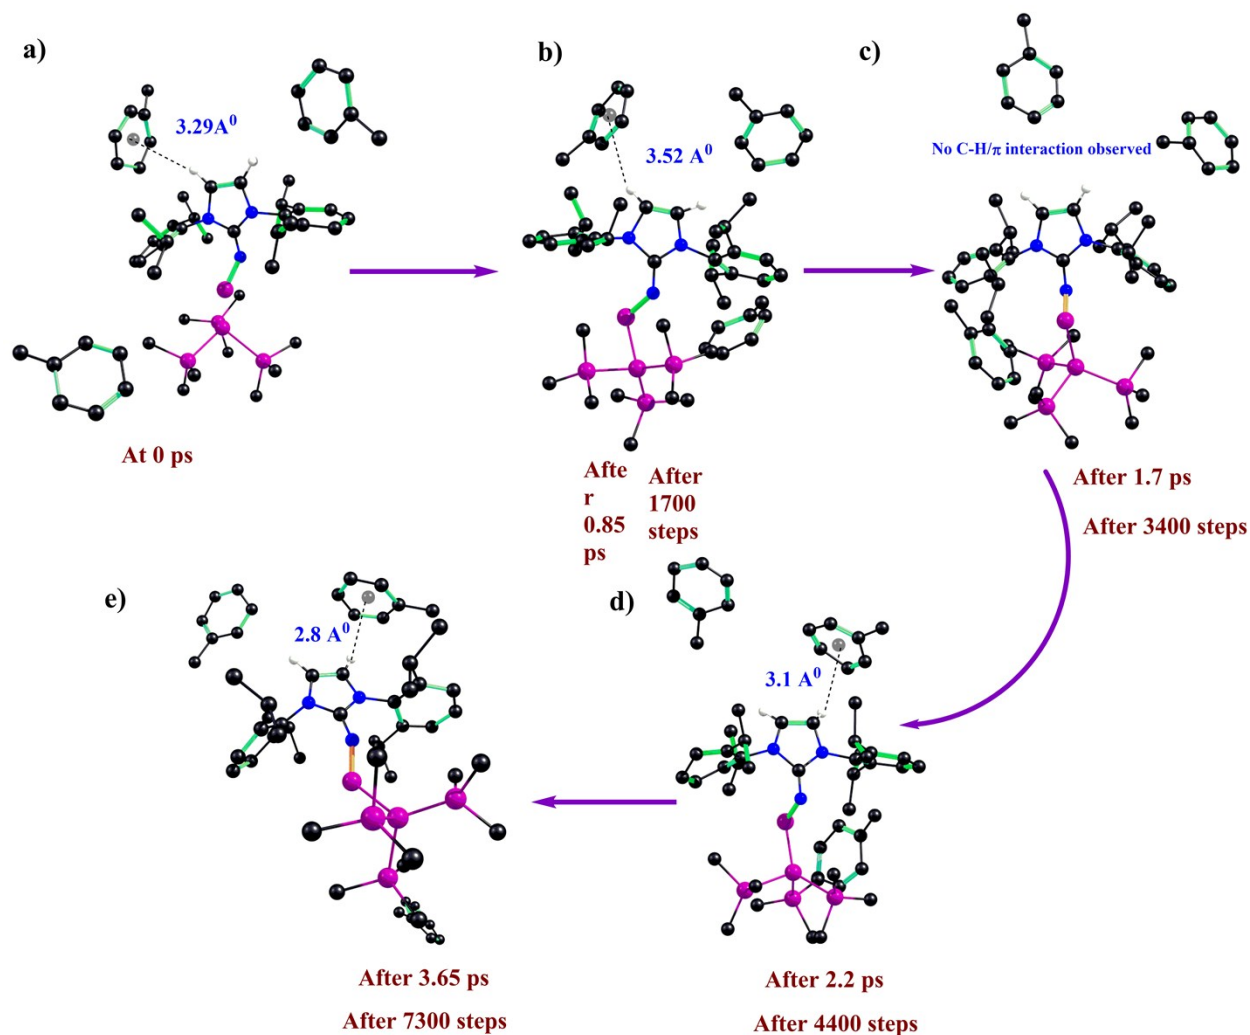

**Fig. S13** The different snapshots for observed C-H/ $\pi$  interactions in *ab initio* molecular dynamics simulations done at a temperature of 1000.0 K. a) Geometry at 0.0 ps, where the bond distance for C-H/ $\pi$  interaction between the hydrogen atoms of C-H and the center of the  $\pi$  ring is  $3.29 \text{ \AA}$  b) after 0.85 ps, when the bond distance for C-H/ $\pi$  interactions is  $3.52 \text{ \AA}$  c) after 1.7 ps, when C-H/ $\pi$  interaction is not observed d) after 2.2 ps, when the bond distance for the C-H/ $\pi$  interaction is  $3.10 \text{ \AA}$ , and e) after 3.65 ps, when the bond distance for the C-H/ $\pi$  interaction is  $2.8 \text{ \AA}$ .

**The free energy profiles for different cases.** As discussed in the manuscript, shown below are the potential energy surfaces for the different cases where toluene is not involved in the CH/ $\pi$  interaction, either in the reactant, transition state or the product.



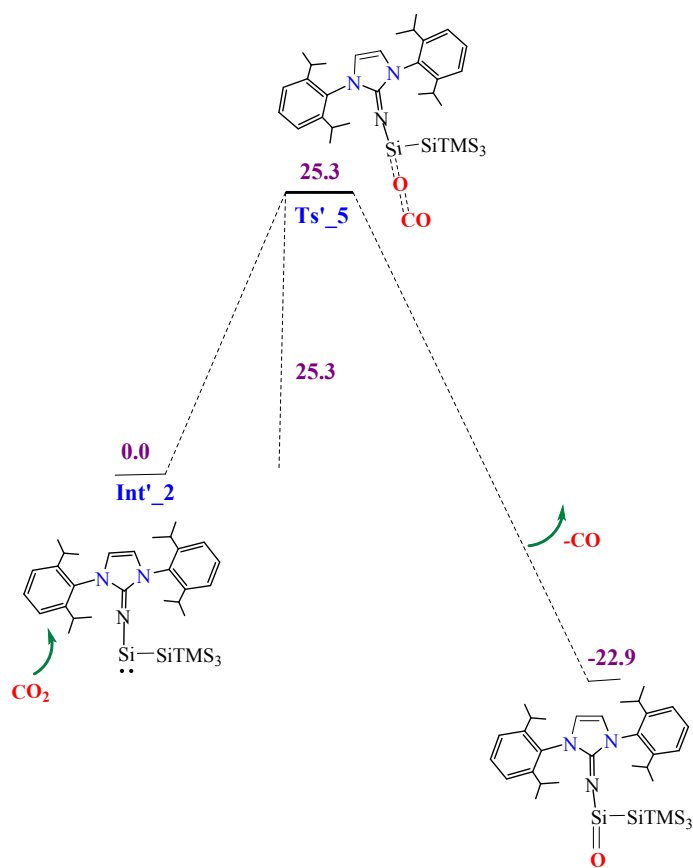

**Fig. S14** The free energy profile for the slowest step of the CO<sub>2</sub> activation by the silepin complex without C-H/ $\pi$  interaction.

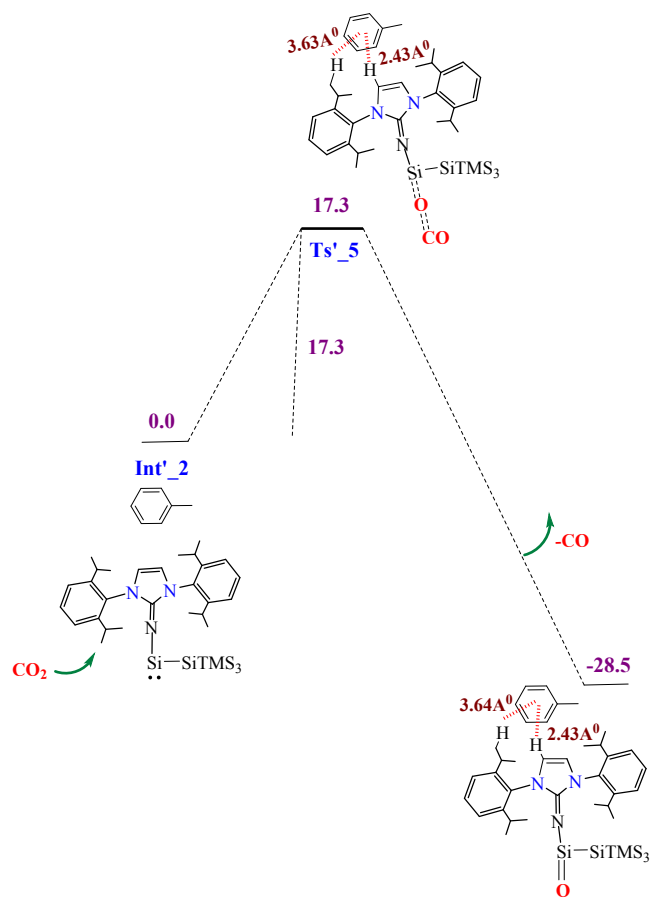

**Fig. S15** The free energy profile for the case where toluene is not involved in C-H/ $\pi$  interaction with the substrate (**Int'\_2**) for the slowest step of the CO<sub>2</sub> activation process by the silepin complex.

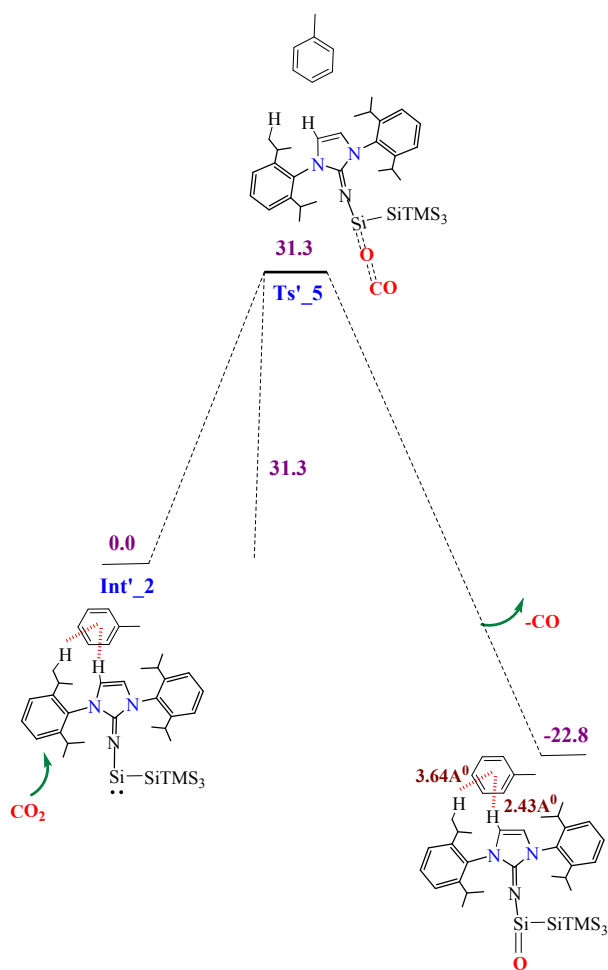

**Fig. S16** The free energy profile for the case where toluene is not involved in C-H/ $\pi$  interaction with the transitionstate (Ts'\_5) for the slowest step of the CO<sub>2</sub> activation process by the silepin complex.

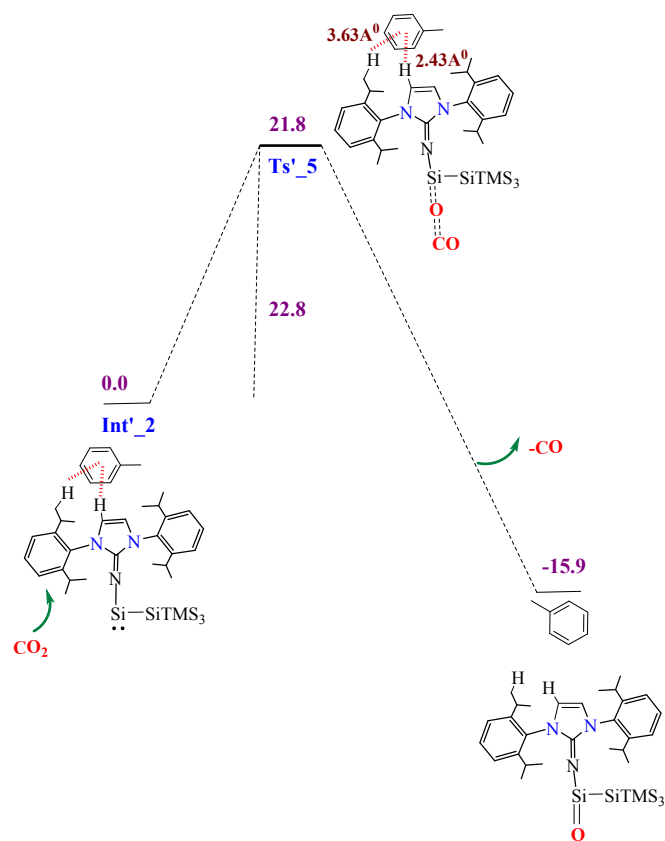

**Fig. S17** The free energy profile for the case where toluene is not involved in C-H/ $\pi$  interaction with the product (IV) for the slowest step of the CO<sub>2</sub> activation process by the silepin complex.

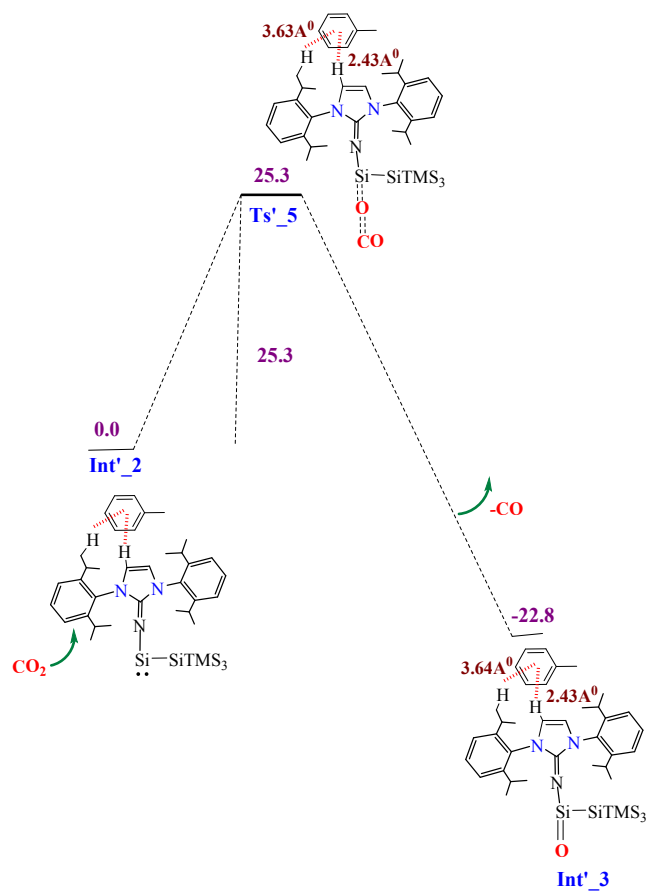

**Fig. S18** The free energy profile for the case where toluene is involved in C-H/ $\pi$  interaction with the substrate (**Int'\_2**), transition state (**Ts'\_5**) and product (**Int'\_3**) for the slowest step of the  $\text{CO}_2$  activation process by the silepin complex.

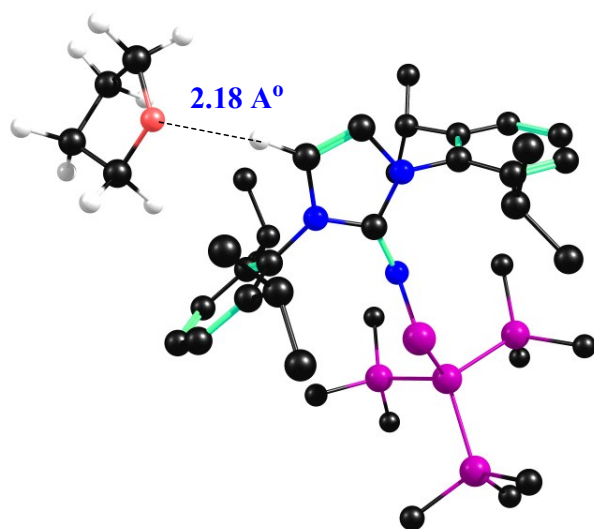

**Fig. S19** The optimized geometry of a structure that demonstrates the presence of C-H/O interactions between a silylene molecule and an explicit tetrahydrofuran (THF) solvent molecule.

**XYZ coordinates of all the stationary points obtained after full optimization at the TPSS-D3/def2-TZVP level of theory.**

**A**

|    |           |           |           |                |           |           |           |
|----|-----------|-----------|-----------|----------------|-----------|-----------|-----------|
| C  | 10.082536 | 13.076027 | 12.027611 | C              | 10.735605 | 14.823016 | 16.994218 |
| C  | 9.697576  | 11.925344 | 12.734787 | C              | 9.820899  | 15.975064 | 17.450352 |
| C  | 9.655526  | 10.645362 | 12.155292 | <b>Toluene</b> |           |           |           |
| C  | 9.988681  | 10.544248 | 10.800538 | C              | -0.039135 | -0.000012 | 0.105997  |
| C  | 10.364079 | 11.669216 | 10.068972 | C              | 0.044611  | -0.000017 | 1.506246  |
| C  | 10.416524 | 12.919666 | 10.677471 | C              | 1.280276  | 0.000004  | 2.152374  |
| N  | 9.349779  | 12.064998 | 14.124970 | C              | 2.462607  | -0.000001 | 1.407596  |
| C  | 10.274534 | 12.015027 | 15.152083 | C              | 2.394324  | -0.000000 | 0.014383  |
| N  | 9.545836  | 12.273709 | 16.298230 | C              | 1.153400  | 0.000001  | -0.627404 |
| C  | 8.206508  | 12.499332 | 15.972869 | H              | -0.870031 | -0.000030 | 2.095557  |
| C  | 8.086129  | 12.370196 | 14.630906 | H              | 1.321395  | 0.000020  | 3.238541  |
| C  | 10.119432 | 12.413503 | 17.610816 | H              | 3.426272  | -0.000003 | 1.909906  |
| C  | 10.098232 | 11.306783 | 18.475898 | H              | 3.306353  | 0.000007  | -0.576831 |
| C  | 10.607481 | 11.490697 | 19.765233 | H              | 1.110647  | 0.000013  | -1.714508 |
| C  | 11.134168 | 12.718318 | 20.158379 | C              | -1.383261 | -0.000000 | -0.584583 |
| C  | 11.175490 | 13.784956 | 19.265062 | H              | -1.269678 | -0.000019 | -1.672274 |
| C  | 10.671608 | 13.655197 | 17.966577 | H              | -1.970254 | -0.882649 | -0.303404 |
| N  | 11.542133 | 11.822986 | 15.010629 | H              | -1.970210 | 0.882688  | -0.303428 |
| Si | 12.952097 | 11.122850 | 15.413409 | <b>A_Tol</b>   |           |           |           |
| Br | 12.869015 | 8.876077  | 15.219139 | C              | 11.032025 | 13.409927 | 18.164412 |
| Br | 14.544524 | 11.857615 | 14.017796 | C              | 10.641778 | 12.167330 | 17.636063 |
| C  | 9.541888  | 9.960987  | 18.036186 | C              | 10.796108 | 10.951699 | 18.326153 |
| C  | 10.447502 | 8.791575  | 18.459851 | C              | 11.332028 | 11.013911 | 19.616131 |

|    |           |           |           |   |           |           |           |
|----|-----------|-----------|-----------|---|-----------|-----------|-----------|
| C  | 11.709523 | 12.231852 | 20.176261 | C | 9.556447  | 15.265618 | 11.846825 |
| C  | 11.569503 | 13.415181 | 19.456370 | H | 8.033279  | 12.741750 | 16.812072 |
| N  | 10.052031 | 12.140671 | 16.322815 | H | 7.697458  | 12.516739 | 14.067937 |
| C  | 10.730500 | 11.845443 | 15.154833 | H | 11.472199 | 10.100174 | 20.184023 |
| N  | 9.783796  | 11.959729 | 14.154610 | H | 12.130354 | 12.256684 | 21.177756 |
| C  | 8.559878  | 12.355537 | 14.693217 | H | 11.889105 | 14.352445 | 19.901067 |
| C  | 8.723718  | 12.466152 | 16.031811 | H | 10.617719 | 9.706626  | 16.614150 |
| C  | 10.073889 | 11.749053 | 12.760783 | H | 8.292522  | 10.167133 | 17.394667 |
| C  | 10.372241 | 12.866032 | 11.967056 | H | 8.619790  | 9.279231  | 18.896659 |
| C  | 10.621604 | 12.640799 | 10.607303 | H | 8.616350  | 8.425734  | 17.338313 |
| C  | 10.589710 | 11.354185 | 10.080404 | H | 12.284633 | 8.633793  | 18.173753 |
| C  | 10.329154 | 10.259721 | 10.904763 | H | 10.999358 | 7.549690  | 17.614487 |
| C  | 10.072427 | 10.430966 | 12.268054 | H | 10.942470 | 8.199560  | 19.257263 |
| C  | 10.489308 | 14.264892 | 12.552260 | H | 10.139277 | 14.551945 | 16.600780 |
| C  | 11.956717 | 14.736275 | 12.510109 | H | 12.482725 | 14.050072 | 15.919482 |
| C  | 9.802471  | 9.249355  | 13.190656 | H | 13.090118 | 15.042625 | 17.253581 |
| C  | 8.287380  | 9.028016  | 13.380578 | H | 12.175325 | 15.799804 | 15.929596 |
| N  | 11.969725 | 11.550293 | 14.967703 | H | 10.421646 | 16.782443 | 17.514285 |
| Si | 13.443089 | 10.962529 | 15.301444 | H | 11.390187 | 16.190945 | 18.866787 |
| Br | 14.296223 | 11.443848 | 17.325945 | H | 9.671414  | 15.763285 | 18.760607 |
| C  | 10.400189 | 9.627031  | 17.686144 | H | 10.336677 | 9.260646  | 10.480455 |
| C  | 8.887692  | 9.362936  | 17.837507 | H | 10.786661 | 11.197359 | 9.023116  |
| C  | 10.938701 | 14.685765 | 17.338238 | H | 10.858266 | 13.481011 | 9.960048  |
| C  | 12.253484 | 14.906650 | 16.559597 | H | 10.231065 | 9.498926  | 14.168463 |
| Br | 13.481970 | 8.715756  | 15.125460 | H | 7.815304  | 8.781773  | 12.422473 |
| Br | 14.919907 | 11.762279 | 13.813915 | H | 7.798569  | 9.919074  | 13.785038 |
| C  | 11.209734 | 8.436256  | 18.221180 | H | 8.110046  | 8.198783  | 14.074726 |
| C  | 10.583410 | 15.924600 | 18.175734 | H | 10.014134 | 7.560145  | 11.810397 |
| C  | 10.478386 | 7.951546  | 12.722627 | H | 10.376222 | 7.186294  | 13.499262 |

|           |           |           |           |    |          |           |           |
|-----------|-----------|-----------|-----------|----|----------|-----------|-----------|
| H         | 11.544976 | 8.104440  | 12.534256 | C  | 4.093823 | 21.310751 | 9.230794  |
| H         | 10.190115 | 14.221719 | 13.604202 | N  | 5.442800 | 18.082390 | 10.464255 |
| H         | 12.308029 | 14.824281 | 11.475798 | C  | 5.660603 | 17.706754 | 11.777184 |
| H         | 12.606639 | 14.028597 | 13.032837 | N  | 5.677501 | 16.325741 | 11.753745 |
| H         | 12.052632 | 15.717926 | 12.987560 | C  | 5.443653 | 15.867580 | 10.453499 |
| H         | 9.819513  | 15.377151 | 10.789065 | C  | 5.304251 | 16.951381 | 9.657395  |
| H         | 9.636237  | 16.251654 | 12.317627 | C  | 5.806759 | 15.489528 | 12.916624 |
| H         | 8.512482  | 14.939364 | 11.903943 | C  | 7.097223 | 15.193525 | 13.392969 |
| C         | 17.115610 | 6.798053  | 15.628547 | C  | 7.189852 | 14.333972 | 14.490806 |
| C         | 17.571973 | 5.482243  | 15.561457 | C  | 6.044731 | 13.813253 | 15.092025 |
| C         | 18.902058 | 5.182150  | 15.867795 | C  | 4.782019 | 14.155944 | 14.620292 |
| C         | 19.767026 | 6.210875  | 16.241030 | C  | 4.634835 | 15.010307 | 13.520997 |
| C         | 19.304149 | 7.527700  | 16.306819 | C  | 8.331431 | 15.797901 | 12.735831 |
| C         | 17.974262 | 7.843235  | 16.002102 | C  | 9.511703 | 15.955553 | 13.705840 |
| H         | 16.888716 | 4.688555  | 15.269712 | C  | 3.251864 | 15.419531 | 13.037042 |
| H         | 19.258640 | 4.157009  | 15.816419 | C  | 2.436359 | 14.201606 | 12.564593 |
| H         | 20.803930 | 5.990551  | 16.482114 | N  | 5.785823 | 18.515434 | 12.772639 |
| H         | 19.985992 | 8.323408  | 16.600171 | Si | 6.233690 | 19.042083 | 14.239058 |
| C         | 17.469473 | 9.264544  | 16.068370 | Br | 8.402111 | 19.660620 | 14.262035 |
| H         | 16.078794 | 7.023273  | 15.389624 | C  | 7.929106 | 19.510973 | 10.187693 |
| H         | 16.607867 | 9.348386  | 16.739072 | C  | 9.006171 | 20.541557 | 10.557830 |
| H         | 18.247346 | 9.946516  | 16.424346 | C  | 2.841472 | 19.242911 | 10.053319 |
| H         | 17.136315 | 9.612064  | 15.083941 | C  | 1.626782 | 19.705209 | 9.235193  |
| <b>A'</b> |           |           |           | C  | 8.430518 | 18.593923 | 9.054413  |
| C         | 4.121185  | 20.007679 | 9.739448  | C  | 2.525689 | 19.339700 | 11.562816 |
| C         | 5.382613  | 19.446922 | 10.007253 | Br | 5.028718 | 20.857594 | 14.775262 |
| C         | 6.589091  | 20.147704 | 9.837693  | Br | 5.984118 | 17.615420 | 15.960324 |
| C         | 6.505803  | 21.449466 | 9.331056  | C  | 2.502950 | 16.210868 | 14.126226 |
| C         | 5.273978  | 22.019417 | 9.018621  | C  | 8.757765 | 14.985696 | 11.495248 |



|   |           |           |           |              |          |           |           |
|---|-----------|-----------|-----------|--------------|----------|-----------|-----------|
| H | 5.405012  | 14.813787 | 10.232203 | H            | 3.017904 | 18.186314 | 9.816060  |
| H | 5.135544  | 17.037413 | 8.596415  | H            | 2.300409 | 20.377425 | 11.832704 |
| H | 8.164884  | 14.079878 | 14.893388 | H            | 3.369478 | 19.015959 | 12.176948 |
| H | 6.140389  | 13.150549 | 15.947933 | H            | 1.654207 | 18.721546 | 11.807123 |
| H | 3.897646  | 13.767074 | 15.117661 | H            | 1.304185 | 20.709431 | 9.531343  |
| H | 8.057074  | 16.803925 | 12.396313 | H            | 0.786396 | 19.025724 | 9.411262  |
| H | 7.954631  | 14.930562 | 10.753909 | H            | 1.836087 | 19.715548 | 8.161406  |
| H | 9.030233  | 13.964046 | 11.783540 | H            | 3.657088 | 19.406875 | 6.678719  |
| H | 9.626497  | 15.453831 | 11.019159 | C            | 2.184897 | 17.105129 | 6.482063  |
| H | 9.209899  | 16.483521 | 14.615124 | H            | 1.641235 | 17.996912 | 6.155537  |
| H | 10.306038 | 16.534310 | 13.223384 | H            | 1.927899 | 16.931675 | 7.534943  |
| H | 9.934313  | 14.984706 | 13.988788 | H            | 1.821113 | 16.247110 | 5.908465  |
| H | 3.374869  | 16.085274 | 12.177383 | C            | 3.676148 | 17.280270 | 6.320831  |
| H | 3.076582  | 17.091669 | 14.430174 | C            | 4.504253 | 16.180332 | 6.055539  |
| H | 2.331394  | 15.593509 | 15.014859 | C            | 5.887827 | 16.331803 | 5.946145  |
| H | 1.529505  | 16.542756 | 13.749050 | C            | 6.470454 | 17.590494 | 6.105146  |
| H | 1.460952  | 14.524451 | 12.184104 | C            | 5.658745 | 18.694346 | 6.371080  |
| H | 2.262822  | 13.498134 | 13.386541 | C            | 4.275642 | 18.538476 | 6.470334  |
| H | 2.959316  | 13.666080 | 11.765044 | H            | 4.059153 | 15.195223 | 5.933061  |
| H | 7.412777  | 22.025966 | 9.181697  | H            | 6.510847 | 15.465928 | 5.738593  |
| H | 5.232458  | 23.030265 | 8.621653  | H            | 7.547154 | 17.708339 | 6.028385  |
| H | 3.142066  | 21.780053 | 9.003043  | H            | 6.099351 | 19.676998 | 6.514520  |
| H | 7.768670  | 18.890177 | 11.075815 | <b>Ts'_1</b> |          |           |           |
| H | 8.615106  | 19.176887 | 8.144635  | C            | 4.181222 | 20.017418 | 9.717688  |
| H | 7.704706  | 17.812986 | 8.815392  | C            | 5.428462 | 19.437188 | 10.013581 |
| H | 9.369740  | 18.111302 | 9.348769  | C            | 6.647067 | 20.121698 | 9.866355  |
| H | 9.322221  | 21.127945 | 9.687454  | C            | 6.592470 | 21.425667 | 9.362489  |
| H | 9.888689  | 20.022081 | 10.944896 | C            | 5.376398 | 22.014971 | 9.028089  |
| H | 8.650593  | 21.227758 | 11.332054 | C            | 4.183018 | 21.321218 | 9.212004  |

|    |          |           |           |    |           |           |           |
|----|----------|-----------|-----------|----|-----------|-----------|-----------|
| N  | 5.454544 | 18.075700 | 10.480412 | Si | 4.067013  | 23.373209 | 16.717276 |
| C  | 5.687918 | 17.702262 | 11.798680 | C  | 5.497889  | 24.581736 | 16.285211 |
| N  | 5.597991 | 16.317845 | 11.787491 | Si | 2.708509  | 20.001738 | 16.861970 |
| C  | 5.303506 | 15.865388 | 10.500766 | C  | 1.260231  | 20.952330 | 17.657570 |
| C  | 5.217796 | 16.948448 | 9.694157  | K  | 7.679340  | 22.327991 | 16.062266 |
| C  | 5.767595 | 15.480538 | 12.944864 | Si | 5.422236  | 20.925168 | 19.186950 |
| C  | 7.074403 | 15.188019 | 13.376285 | C  | 4.064693  | 21.156479 | 20.501529 |
| C  | 7.208960 | 14.324801 | 14.466932 | C  | 2.227300  | 19.686951 | 15.053980 |
| C  | 6.088721 | 13.787720 | 15.099731 | C  | 2.706755  | 18.330683 | 17.768979 |
| C  | 4.809332 | 14.127067 | 14.673227 | C  | 6.782680  | 22.201191 | 19.621574 |
| C  | 4.620695 | 14.996061 | 13.591866 | C  | 6.192896  | 19.219406 | 19.517263 |
| C  | 8.284388 | 15.793792 | 12.677126 | C  | 2.847428  | 23.606160 | 15.277489 |
| C  | 9.498882 | 15.948060 | 13.604071 | C  | 3.272375  | 24.165809 | 18.255434 |
| C  | 3.220970 | 15.409667 | 13.163680 | H  | 5.197806  | 14.814781 | 10.287000 |
| C  | 2.501469 | 14.263243 | 12.426598 | H  | 5.029931  | 17.030211 | 8.636002  |
| N  | 5.954721 | 18.474244 | 12.782184 | H  | 8.198583  | 14.074851 | 14.835289 |
| Si | 6.202901 | 19.351912 | 14.129492 | H  | 6.217064  | 13.116747 | 15.944973 |
| Br | 8.497002 | 19.701284 | 14.331329 | H  | 3.944681  | 13.728746 | 15.196589 |
| C  | 7.971179 | 19.465700 | 10.237967 | H  | 7.999589  | 16.801694 | 12.355856 |
| C  | 9.065711 | 20.480989 | 10.598200 | H  | 7.831904  | 14.934415 | 10.708945 |
| C  | 2.883041 | 19.271999 | 10.001978 | H  | 8.944102  | 13.961457 | 11.692757 |
| C  | 1.679266 | 19.788135 | 9.200417  | H  | 9.514270  | 15.452341 | 10.911237 |
| C  | 8.459835 | 18.517457 | 9.125543  | H  | 9.228005  | 16.474610 | 14.524018 |
| C  | 2.569503 | 19.324676 | 11.511759 | H  | 10.276363 | 16.527427 | 13.094902 |
| Br | 5.543915 | 21.465505 | 13.337360 | H  | 9.931960  | 14.977038 | 13.870812 |
| Br | 5.864261 | 17.833625 | 15.821961 | H  | 3.319154  | 16.246324 | 12.464531 |
| C  | 2.388603 | 15.905190 | 14.360500 | H  | 2.925698  | 16.677457 | 14.915870 |
| C  | 8.663016 | 14.985013 | 11.419238 | H  | 2.154156  | 15.087830 | 15.051342 |
| Si | 4.779956 | 21.121953 | 16.930248 | H  | 1.441433  | 16.327414 | 14.007305 |

|   |          |           |           |   |          |           |           |
|---|----------|-----------|-----------|---|----------|-----------|-----------|
| H | 1.503482 | 14.582942 | 12.106166 | H | 2.147126 | 20.629648 | 14.501878 |
| H | 2.387600 | 13.394062 | 13.084323 | H | 5.101957 | 25.603910 | 16.223278 |
| H | 3.061571 | 13.946183 | 11.540339 | H | 2.399314 | 23.598823 | 18.593691 |
| H | 7.510478 | 21.989623 | 9.234145  | H | 2.949709 | 25.192191 | 18.030915 |
| H | 5.356765 | 23.027881 | 8.634397  | H | 5.465023 | 18.418575 | 19.345495 |
| H | 3.242550 | 21.803780 | 8.966249  | H | 5.939219 | 24.361631 | 15.302212 |
| H | 7.790782 | 18.867930 | 11.137093 | H | 7.042072 | 19.031757 | 18.849633 |
| H | 8.657190 | 19.077752 | 8.204061  | H | 6.291100 | 24.605321 | 17.047126 |
| H | 7.719881 | 17.745166 | 8.901609  | H | 3.277158 | 20.403056 | 20.385311 |
| H | 9.389417 | 18.023950 | 9.432514  | H | 6.544876 | 19.143639 | 20.555339 |
| H | 9.402255 | 21.045377 | 9.720768  | H | 2.622053 | 24.672591 | 15.140532 |
| H | 9.933814 | 19.951626 | 11.004582 | H | 3.269492 | 23.221001 | 14.342800 |
| H | 8.713696 | 21.186501 | 11.356986 | H | 3.593039 | 22.142039 | 20.429662 |
| H | 3.034608 | 18.220378 | 9.729209  | H | 7.720667 | 21.998531 | 19.083934 |
| H | 2.377523 | 20.356441 | 11.822829 | H | 4.485076 | 21.050087 | 21.511604 |
| H | 3.403719 | 18.955911 | 12.112123 | H | 1.902094 | 23.082774 | 15.454107 |
| H | 1.683037 | 18.723373 | 11.742023 | H | 6.472012 | 23.228929 | 19.394679 |
| H | 1.383624 | 20.792466 | 9.523656  | H | 7.022987 | 22.158321 | 20.692326 |
| H | 0.821816 | 19.126663 | 9.362657  | H | 3.680049 | 19.406129 | 6.669603  |
| H | 1.884156 | 19.820701 | 8.125980  | C | 2.167784 | 17.134654 | 6.441104  |
| H | 1.730374 | 17.844552 | 17.635779 | H | 1.651884 | 18.023291 | 6.064659  |
| H | 0.341715 | 20.352717 | 17.584154 | H | 1.873722 | 17.005203 | 7.490612  |
| H | 2.867520 | 18.467514 | 18.844707 | H | 1.806719 | 16.262658 | 5.887259  |
| H | 1.451046 | 21.147231 | 18.718842 | C | 3.666468 | 17.277739 | 6.321881  |
| H | 3.478088 | 17.651876 | 17.395338 | C | 4.479589 | 16.159989 | 6.086557  |
| H | 1.268794 | 19.156778 | 14.974492 | C | 5.868468 | 16.283688 | 6.014069  |
| H | 1.068623 | 21.915022 | 17.171638 | C | 6.471139 | 17.531609 | 6.181524  |
| H | 3.982713 | 24.211876 | 19.089653 | C | 5.674630 | 18.652779 | 6.419898  |
| H | 2.989199 | 19.081795 | 14.550849 | C | 4.286668 | 18.524754 | 6.481442  |

|               |          |           |           |    |           |           |           |
|---------------|----------|-----------|-----------|----|-----------|-----------|-----------|
| H             | 4.018698 | 15.182841 | 5.958812  | C  | 0.088609  | 16.918382 | 11.201850 |
| H             | 6.479680 | 15.404330 | 5.829440  | C  | 0.869094  | 18.042361 | 10.950791 |
| H             | 7.551571 | 17.627749 | 6.133612  | C  | 2.250468  | 17.924901 | 10.814030 |
| H             | 6.130565 | 19.627071 | 6.573044  | C  | 2.884325  | 16.684932 | 10.943595 |
| <b>Int'_1</b> |          |           |           | N  | 2.806394  | 13.387231 | 9.257564  |
| C             | 4.254551 | 15.509118 | 15.738737 | Si | 3.614285  | 13.189893 | 7.820220  |
| C             | 4.450870 | 14.128614 | 15.891646 | Si | 2.427047  | 13.759301 | 5.887202  |
| C             | 3.337955 | 13.331340 | 16.186788 | Si | 0.552586  | 12.319410 | 5.765313  |
| C             | 2.063503 | 13.889766 | 16.310837 | C  | -0.359996 | 12.630481 | 4.133542  |
| C             | 1.880826 | 15.262644 | 16.142139 | C  | -0.180465 | 14.427751 | 11.620170 |
| C             | 2.984109 | 16.072064 | 15.857321 | C  | -0.655660 | 14.417969 | 13.086678 |
| C             | 5.820107 | 13.522902 | 15.700508 | C  | 4.393429  | 16.543273 | 10.825513 |
| C             | 2.927384 | 13.836984 | 12.768092 | C  | 5.065515  | 16.666750 | 12.208463 |
| C             | 3.351003 | 12.559954 | 12.674252 | C  | 7.245315  | 11.444308 | 10.156726 |
| N             | 3.363508 | 12.218214 | 11.319018 | C  | -1.372112 | 14.315071 | 10.654388 |
| C             | 2.963868 | 13.299444 | 10.543913 | C  | 5.012634  | 17.537957 | 9.833247  |
| N             | 2.689847 | 14.296390 | 11.473251 | Br | 5.577661  | 14.403670 | 7.941066  |
| C             | 3.663301 | 10.890936 | 10.850560 | C  | 0.610765  | 10.535032 | 11.978671 |
| C             | 2.592740 | 10.052269 | 10.480595 | Si | 3.807229  | 13.427722 | 3.986084  |
| C             | 2.910359 | 8.747938  | 10.093744 | C  | 5.591264  | 13.971810 | 4.277249  |
| C             | 4.230479 | 8.298346  | 10.094786 | Si | 1.777191  | 16.028097 | 6.055565  |
| C             | 5.263267 | 9.149843  | 10.467591 | C  | 3.308121  | 17.125966 | 5.874318  |
| C             | 5.002770 | 10.472914 | 10.844026 | C  | 3.807723  | 11.616949 | 3.441658  |
| C             | 1.149882 | 10.542789 | 10.531479 | C  | 3.091966  | 14.459905 | 2.564371  |
| C             | 0.200042 | 9.745180  | 9.626227  | C  | 0.954491  | 16.347412 | 7.719545  |
| C             | 6.143687 | 11.402408 | 11.231665 | C  | 0.538178  | 16.484809 | 4.695799  |
| C             | 6.731901 | 11.000068 | 12.598980 | C  | 1.037912  | 10.493529 | 5.807587  |
| C             | 2.071033 | 15.571126 | 11.215570 | C  | -0.610660 | 12.672116 | 7.212992  |
| C             | 0.673483 | 15.654198 | 11.334397 | Br | 4.422946  | 11.071822 | 7.380629  |

|   |           |           |           |   |           |           |           |
|---|-----------|-----------|-----------|---|-----------|-----------|-----------|
| H | -1.240998 | 13.514002 | 13.289825 | H | 4.596990  | 15.537372 | 10.443713 |
| H | 0.192582  | 14.440545 | 13.777340 | H | -0.069492 | 12.607311 | 8.162460  |
| H | 7.530580  | 11.692007 | 12.888997 | H | 3.051864  | 18.175244 | 6.070591  |
| H | 5.967344  | 11.009672 | 13.382903 | H | -0.682289 | 13.672034 | 4.033461  |
| H | -1.287803 | 15.289489 | 13.292651 | H | -0.006047 | 15.825241 | 7.787221  |
| H | 7.155207  | 9.990065  | 12.554093 | H | 2.842330  | 18.809074 | 10.599364 |
| H | 2.767363  | 14.471254 | 13.623708 | H | 1.575986  | 15.999498 | 8.549058  |
| H | 3.638925  | 11.851532 | 13.431728 | H | 3.723167  | 17.063490 | 4.861578  |
| H | -1.036382 | 14.345195 | 9.615284  | H | -1.251040 | 11.991481 | 4.075554  |
| H | 0.444244  | 13.542661 | 11.469995 | H | 2.120140  | 8.070210  | 9.788119  |
| H | -1.897606 | 13.367593 | 10.818188 | H | 0.574621  | 9.684170  | 8.601444  |
| H | 8.007349  | 12.179677 | 10.437332 | H | 1.147222  | 11.577999 | 10.170845 |
| H | 5.738172  | 12.415425 | 11.322574 | H | 4.093923  | 16.825791 | 6.575495  |
| H | 6.288462  | 8.791232  | 10.449355 | H | 4.969697  | 18.566721 | 10.208934 |
| H | -0.989298 | 17.021520 | 11.291105 | H | 0.766228  | 17.419054 | 7.859411  |
| H | 0.315735  | 17.559011 | 4.750418  | H | 6.065809  | 17.286603 | 9.672264  |
| H | 7.739567  | 10.471623 | 10.053772 | H | 0.130197  | 9.875383  | 5.809331  |
| H | 4.690868  | 15.910945 | 12.904152 | H | 4.504137  | 17.499112 | 8.866017  |
| H | 0.919191  | 16.268977 | 3.692779  | H | 0.048382  | 8.726166  | 10.000388 |
| H | -0.405920 | 15.943183 | 4.823890  | H | 1.205565  | 11.170631 | 12.640078 |
| H | -2.092348 | 15.125842 | 10.808716 | H | 1.627287  | 10.250331 | 6.695987  |
| H | -1.041770 | 13.676709 | 7.140206  | H | 1.636326  | 10.218323 | 4.933416  |
| H | -1.435795 | 11.948890 | 7.235723  | H | -0.778456 | 10.235814 | 9.602383  |
| H | 6.832510  | 11.727393 | 9.185334  | H | 0.619263  | 9.515401  | 12.380863 |
| H | 0.397378  | 19.016093 | 10.846297 | H | 3.159486  | 15.533999 | 2.771457  |
| H | 4.873080  | 17.654541 | 12.644115 | H | 2.039542  | 14.218063 | 2.377045  |
| H | 4.452116  | 7.278153  | 9.792623  | H | -0.422315 | 10.901066 | 11.996098 |
| H | 6.149474  | 16.537049 | 12.113235 | H | 5.647037  | 15.007929 | 4.626792  |
| H | 0.278400  | 12.393193 | 3.274476  | H | 6.079304  | 13.342490 | 5.028017  |

|              |          |           |           |    |           |           |           |
|--------------|----------|-----------|-----------|----|-----------|-----------|-----------|
| H            | 2.813801 | 11.298674 | 3.107219  | C  | 10.986134 | 13.349677 | 13.423076 |
| H            | 3.653507 | 14.261293 | 1.641919  | C  | 11.218458 | 12.162657 | 12.737125 |
| H            | 4.121903 | 10.957159 | 4.256983  | C  | 10.253356 | 11.157538 | 12.721987 |
| H            | 6.155257 | 13.892787 | 3.338175  | C  | 9.043816  | 11.309436 | 13.407069 |
| H            | 4.502785 | 11.483808 | 2.602230  | C  | 9.541618  | 14.853850 | 14.869982 |
| H            | 5.105096 | 16.147295 | 15.511253 | C  | 9.798700  | 16.090420 | 13.991362 |
| H            | 6.577267 | 14.058721 | 16.283456 | C  | 7.986256  | 10.216770 | 13.424740 |
| H            | 6.119490 | 13.577474 | 14.646432 | C  | 8.036791  | 9.309630  | 12.188206 |
| H            | 5.836689 | 12.470725 | 15.998734 | N  | 6.097592  | 13.467694 | 13.270730 |
| H            | 3.469015 | 12.258725 | 16.313848 | Si | 4.720406  | 13.364724 | 12.265147 |
| H            | 1.213435 | 13.249955 | 16.531340 | Br | 1.850557  | 13.285772 | 12.399249 |
| H            | 0.890017 | 15.699094 | 16.229090 | K  | 1.784505  | 10.222751 | 11.621308 |
| H            | 2.853254 | 17.142313 | 15.721918 | C  | 5.536663  | 16.258359 | 15.510613 |
| <b>Ts'_2</b> |          |           |           | C  | 6.392241  | 16.357851 | 16.793841 |
| C            | 4.313347 | 15.374577 | 15.731731 | C  | 10.386989 | 14.912354 | 16.158336 |
| C            | 4.436294 | 13.972401 | 15.831832 | C  | 2.867328  | 11.083982 | 17.574292 |
| C            | 3.357258 | 13.131534 | 16.150828 | C  | 8.086495  | 9.372652  | 14.712091 |
| C            | 2.105822 | 13.729020 | 16.333553 | Br | 4.875111  | 10.965865 | 11.486563 |
| C            | 1.944870 | 15.102335 | 16.198252 | Si | 5.264610  | 14.460050 | 10.198965 |
| C            | 3.036737 | 15.916591 | 15.901905 | Si | 3.590541  | 14.127746 | 8.563251  |
| C            | 3.529569 | 11.624062 | 16.294522 | C  | 2.150857  | 15.338600 | 8.764510  |
| C            | 3.013271 | 10.882610 | 15.048033 | Si | 7.359598  | 13.831070 | 9.308253  |
| N            | 5.737501 | 13.387168 | 15.688114 | C  | 8.679385  | 13.878530 | 10.652040 |
| C            | 6.506482 | 12.961796 | 16.775515 | C  | 7.920947  | 15.003244 | 7.922378  |
| C            | 7.691273 | 12.534815 | 16.294887 | C  | 7.270582  | 12.077145 | 8.596953  |
| N            | 7.660983 | 12.673422 | 14.907952 | Si | 5.243456  | 16.759846 | 10.705064 |
| C            | 6.434760 | 13.201171 | 14.488973 | C  | 3.648881  | 17.181607 | 11.639344 |
| C            | 8.843799 | 12.513860 | 14.104243 | C  | 6.744912  | 17.193499 | 11.774154 |
| C            | 9.788380 | 13.554321 | 14.117424 | C  | 5.314267  | 17.850948 | 9.153734  |

|    |           |           |           |   |           |           |           |
|----|-----------|-----------|-----------|---|-----------|-----------|-----------|
| C  | 5.194888  | 17.678392 | 15.039376 | H | -0.057624 | 11.646096 | 15.468566 |
| Si | -0.814212 | 13.017943 | 12.106794 | H | -1.639610 | 11.277102 | 16.181702 |
| Si | -1.846562 | 11.653251 | 13.717942 | H | -1.926339 | 9.551405  | 12.299208 |
| C  | -1.119905 | 11.909203 | 15.449406 | H | -2.174881 | 9.182574  | 14.013036 |
| Si | -1.586439 | 12.268024 | 10.011433 | H | -0.548114 | 9.506749  | 13.423983 |
| C  | -0.691188 | 10.695461 | 9.402569  | H | -0.581639 | 15.492322 | 14.666916 |
| C  | -1.319592 | 13.574123 | 8.669012  | H | -2.289389 | 15.043466 | 14.825623 |
| C  | -3.431524 | 11.814038 | 10.020606 | H | -1.847789 | 16.706515 | 14.394382 |
| Si | -1.605882 | 15.206992 | 12.407772 | H | -4.080990 | 14.767172 | 12.274476 |
| C  | -3.381123 | 15.446745 | 11.775388 | H | -3.451455 | 15.263913 | 10.696736 |
| C  | -0.493748 | 16.444834 | 11.507070 | H | -3.714509 | 16.476738 | 11.963052 |
| C  | -1.581830 | 15.651027 | 14.250285 | H | -0.833407 | 17.471766 | 11.696890 |
| C  | -1.600491 | 9.804830  | 13.314455 | H | -0.500033 | 16.281330 | 10.423912 |
| C  | -3.717115 | 11.949599 | 13.863043 | H | 0.541897  | 16.356677 | 11.852073 |
| C  | 4.308157  | 14.410838 | 6.829313  | H | 10.173373 | 15.834150 | 16.711475 |
| C  | 2.852286  | 12.383573 | 8.616599  | H | 10.171734 | 14.062170 | 16.812255 |
| H  | -1.868111 | 14.496813 | 8.889018  | H | 3.087733  | 10.016603 | 17.688143 |
| H  | -1.665804 | 13.199354 | 7.696734  | H | 3.237242  | 11.607759 | 18.462171 |
| H  | -0.260325 | 13.831012 | 8.578581  | H | 11.456622 | 14.896685 | 15.918281 |
| H  | -0.779903 | 9.863460  | 10.114154 | H | 1.777964  | 11.196428 | 17.542900 |
| H  | 0.367952  | 10.885538 | 9.188784  | H | 8.559928  | 12.144900 | 16.798782 |
| H  | -1.144610 | 10.355842 | 8.462343  | H | 6.128695  | 13.014045 | 17.782801 |
| H  | -3.628946 | 10.952418 | 10.668762 | H | 9.209201  | 16.047312 | 13.073050 |
| H  | -3.758388 | 11.552062 | 9.004735  | H | 8.488594  | 14.876778 | 15.164172 |
| H  | -4.049429 | 12.646876 | 10.372739 | H | 9.520094  | 16.999174 | 14.536992 |
| H  | -3.922119 | 12.978596 | 14.180764 | H | 3.168497  | 9.802523  | 15.162548 |
| H  | -4.153183 | 11.273213 | 14.611256 | H | 4.600807  | 11.411945 | 16.366815 |
| H  | -4.233822 | 11.786954 | 12.911849 | H | 1.246586  | 13.113338 | 16.575187 |
| H  | -1.209153 | 12.951368 | 15.773912 | H | 11.740041 | 14.132312 | 13.413648 |

|   |           |           |           |   |           |           |           |
|---|-----------|-----------|-----------|---|-----------|-----------|-----------|
| H | 8.881273  | 14.658222 | 7.514857  | H | 7.164954  | 8.647813  | 12.186066 |
| H | 1.944353  | 11.074494 | 14.903996 | H | 3.671568  | 18.216247 | 12.005951 |
| H | 7.976295  | 9.989594  | 15.607486 | H | 8.014438  | 9.895721  | 11.264943 |
| H | 7.202331  | 15.054497 | 7.098283  | H | 4.690718  | 18.248428 | 15.828499 |
| H | 8.068395  | 16.019992 | 8.305001  | H | 6.753382  | 15.383281 | 17.129970 |
| H | 10.856523 | 16.176874 | 13.718946 | H | 3.488670  | 16.512900 | 12.492823 |
| H | 7.668543  | 17.101636 | 11.190847 | H | 2.779944  | 17.078048 | 10.981981 |
| H | 6.683803  | 18.222044 | 12.151300 | H | 6.118751  | 18.209221 | 14.788631 |
| H | 3.542816  | 11.223648 | 14.153168 | H | 5.806699  | 16.808639 | 17.603536 |
| H | 12.151973 | 12.022897 | 12.198127 | H | 5.104575  | 13.697026 | 6.591717  |
| H | 9.057188  | 8.865343  | 14.765549 | H | 4.722350  | 15.421113 | 6.730860  |
| H | 0.963839  | 15.547437 | 16.336450 | H | 7.265343  | 16.994773 | 16.609323 |
| H | 7.298891  | 8.609402  | 14.725290 | H | 3.621979  | 11.606247 | 8.574090  |
| H | 4.460005  | 17.671897 | 8.491492  | H | 2.307903  | 12.282039 | 9.562898  |
| H | 7.010275  | 10.713919 | 13.421390 | H | 2.484516  | 16.380597 | 8.720203  |
| H | 6.822963  | 16.515409 | 12.629439 | H | 3.516927  | 14.296403 | 6.076009  |
| H | 8.250923  | 11.775813 | 8.204294  | H | 1.639366  | 15.185696 | 9.719703  |
| H | 6.227306  | 17.667916 | 8.576765  | H | 2.145348  | 12.234845 | 7.790304  |
| H | 8.876801  | 14.907602 | 10.970751 | H | 1.423552  | 15.190967 | 7.955835  |
| H | 10.443839 | 10.245393 | 12.165923 | H | 8.769227  | 8.855247  | 17.900296 |
| H | 8.361043  | 13.317427 | 11.534474 | C | 6.539866  | 9.854664  | 19.115973 |
| H | 6.542877  | 12.008622 | 7.779820  | H | 6.590587  | 8.770143  | 19.256350 |
| H | 5.300721  | 18.911557 | 9.439018  | H | 5.997555  | 10.040097 | 18.179827 |
| H | 2.890786  | 16.988317 | 15.816391 | H | 5.949826  | 10.284236 | 19.931143 |
| H | 4.556494  | 17.674163 | 14.154177 | C | 7.917245  | 10.468037 | 19.047827 |
| H | 6.144834  | 15.784081 | 14.730232 | C | 8.181915  | 11.716291 | 19.625718 |
| H | 6.971116  | 11.362219 | 9.370564  | C | 9.434768  | 12.318670 | 19.496094 |
| H | 8.935028  | 8.680132  | 12.183413 | C | 10.451179 | 11.676462 | 18.786984 |
| H | 9.622726  | 13.450521 | 10.290512 | C | 10.206115 | 10.423667 | 18.219289 |



C 8.952714 9.826449 18.354027  
H 7.394350 12.227498 20.175294  
H 9.614232 13.292904 19.942730  
H 11.424268 12.146730 18.676964  
H 10.989645 9.914647 17.664630

**Int'\_2**

C 4.275061 15.422918 15.686636  
C 4.469682 14.039373 15.806645  
C 3.379068 13.248742 16.191058  
C 2.125924 13.817059 16.429645  
C 1.942807 15.193578 16.289845  
C 3.024795 15.996181 15.919240  
C 5.803132 13.418713 15.469603  
C 2.785622 13.737973 12.812243  
C 3.087062 12.431585 12.661454  
N 3.120626 12.159215 11.287359  
C 2.855307 13.317552 10.565744  
N 2.644570 14.289268 11.536383  
C 3.379073 10.869355 10.709683  
C 2.279590 10.051103 10.379045  
C 2.559223 8.785191 9.856047  
C 3.874083 8.358649 9.672406  
C 4.938039 9.192821 9.997853  
C 4.712938 10.473190 10.519265  
C 0.848462 10.533520 10.590436  
C -0.172957 9.819409 9.692404  
C 5.877822 11.376088 10.897844  
C 6.498319 10.918025 12.233817  
C 2.155185 15.615351 11.283786

C 0.783648 15.855593 11.468098  
C 0.326210 17.164901 11.275771  
C 1.201212 18.177521 10.897904  
C 2.554453 17.904386 10.701009  
C 3.063379 16.616449 10.893070  
N 2.794329 13.467509 9.277887  
Si 3.938371 13.638398 8.040194  
Si 2.546455 13.840162 6.064575  
Si 0.937419 12.132060 5.962654  
C 0.174143 11.954676 4.234757  
C -0.187386 14.747280 11.852314  
C -0.817461 15.014336 13.232425  
C 4.544076 16.302588 10.733263  
C 5.255351 16.353865 12.101293  
C 6.945501 11.452334 9.793437  
C -1.265952 14.547302 10.771687  
C 5.253160 17.204505 9.713508  
C 0.413418 10.391544 12.065019  
Si 3.976685 13.709996 4.194915  
C 5.565344 14.696077 4.513293  
Si 1.496997 15.953821 6.067247  
C 2.784911 17.318966 5.789781  
C 4.476821 11.910226 3.859200  
C 3.168884 14.387126 2.617655  
C 0.641913 16.273715 7.720210  
C 0.190838 16.097074 4.697826  
C 1.758619 10.482662 6.408507  
C -0.451298 12.492696 7.198535  
H -1.480682 14.188117 13.512431

|   |           |           |           |   |           |           |           |
|---|-----------|-----------|-----------|---|-----------|-----------|-----------|
| H | -0.045009 | 15.112801 | 14.002121 | H | -0.034863 | 12.639855 | 8.200524  |
| H | 7.310940  | 11.591803 | 12.528242 | H | 2.308228  | 18.307104 | 5.836898  |
| H | 5.753133  | 10.908249 | 13.035887 | H | -0.298114 | 12.888192 | 3.908946  |
| H | -1.409441 | 15.936516 | 13.223521 | H | -0.203146 | 15.592344 | 7.863796  |
| H | 6.909441  | 9.906077  | 12.140935 | H | 3.220085  | 18.704292 | 10.393185 |
| H | 2.650861  | 14.338204 | 13.696368 | H | 1.325316  | 16.130196 | 8.562227  |
| H | 3.286044  | 11.664080 | 13.389886 | H | 3.267396  | 17.224316 | 4.810211  |
| H | -0.807935 | 14.323333 | 9.804929  | H | -0.591518 | 11.166666 | 4.230996  |
| H | 0.374055  | 13.811245 | 11.925986 | H | 1.743955  | 8.125808  | 9.577339  |
| H | -1.922720 | 13.713831 | 11.045578 | H | 0.126619  | 9.840324  | 8.642535  |
| H | 7.728879  | 12.160960 | 10.084259 | H | 0.828431  | 11.599749 | 10.332954 |
| H | 5.483018  | 12.387863 | 11.039716 | H | 3.571041  | 17.287063 | 6.553155  |
| H | 5.956527  | 8.850492  | 9.839765  | H | 5.324571  | 18.240467 | 10.064178 |
| H | -0.729368 | 17.387431 | 11.408423 | H | 0.258266  | 17.301286 | 7.763832  |
| H | -0.249300 | 17.103779 | 4.696844  | H | 6.271909  | 16.839410 | 9.547402  |
| H | 7.422646  | 10.480495 | 9.624229  | H | 1.037179  | 9.655665  | 6.364484  |
| H | 4.797983  | 15.657899 | 12.810799 | H | 4.731038  | 17.201154 | 8.751333  |
| H | 0.616680  | 15.911590 | 3.705778  | H | -0.307838 | 8.774301  | 9.994264  |
| H | -0.620508 | 15.376148 | 4.853517  | H | 1.059832  | 10.957486 | 12.739835 |
| H | -1.885824 | 15.443665 | 10.655987 | H | 2.185070  | 10.510476 | 7.417322  |
| H | -0.995149 | 13.403780 | 6.922916  | H | 2.571906  | 10.253065 | 5.710675  |
| H | -1.173406 | 11.667564 | 7.240930  | H | -1.145053 | 10.315391 | 9.780327  |
| H | 6.503854  | 11.797983 | 8.853675  | H | 0.434993  | 9.337965  | 12.366088 |
| H | 0.827160  | 19.185905 | 10.742115 | H | 2.942174  | 15.455230 | 2.714352  |
| H | 5.196506  | 17.361909 | 12.528476 | H | 2.230758  | 13.866320 | 2.393060  |
| H | 4.067199  | 7.370787  | 9.262498  | H | -0.610842 | 10.762175 | 12.189088 |
| H | 6.312224  | 16.086066 | 11.990104 | H | 5.353622  | 15.758802 | 4.677274  |
| H | 0.933926  | 11.688522 | 3.491052  | H | 6.088451  | 14.321876 | 5.401493  |
| H | 4.622826  | 15.275019 | 10.357586 | H | 3.609415  | 11.297423 | 3.587199  |

|              |           |           |           |    |           |           |           |
|--------------|-----------|-----------|-----------|----|-----------|-----------|-----------|
| H            | 3.840865  | 14.261880 | 1.758076  | N  | 12.509814 | 10.840966 | 15.199559 |
| H            | 4.944193  | 11.455368 | 4.740602  | C  | 13.663831 | 13.734927 | 13.875553 |
| H            | 6.246703  | 14.614429 | 3.655892  | C  | 13.103592 | 15.103162 | 14.314940 |
| H            | 5.196123  | 11.860124 | 3.030758  | C  | 9.620321  | 11.288709 | 11.979401 |
| H            | 5.109603  | 16.055607 | 15.394196 | C  | 9.914185  | 9.876013  | 12.529347 |
| H            | 6.633767  | 14.029914 | 15.837065 | C  | 9.874671  | 10.635629 | 18.304478 |
| H            | 5.914004  | 13.333048 | 14.380832 | C  | 8.388943  | 10.664828 | 17.941178 |
| H            | 5.896198  | 12.414013 | 15.892841 | C  | 7.712018  | 9.304923  | 18.198984 |
| H            | 3.510348  | 12.173724 | 16.295674 | C  | 10.275131 | 10.245713 | 19.561563 |
| H            | 1.291994  | 13.183325 | 16.718933 | C  | 11.559110 | 10.515984 | 20.119071 |
| H            | 0.968276  | 15.638031 | 16.470437 | C  | 12.534776 | 11.255059 | 19.493509 |
| H            | 2.893450  | 17.069142 | 15.807746 | C  | 12.614104 | 11.572692 | 18.098491 |
| <b>Ts'_3</b> |           |           |           | C  | 13.129239 | 12.946704 | 17.681193 |
| C            | 10.926417 | 12.038039 | 11.748010 | C  | 12.533958 | 14.088587 | 18.518966 |
| C            | 11.649045 | 12.581491 | 12.827780 | C  | 15.181297 | 13.819084 | 13.657491 |
| C            | 12.906499 | 13.191655 | 12.671611 | C  | 8.726800  | 11.195473 | 10.734672 |
| C            | 13.421702 | 13.285439 | 11.374113 | Si | 11.416542 | 6.661957  | 16.739058 |
| C            | 12.713311 | 12.787964 | 10.283432 | C  | 10.188555 | 7.454063  | 15.538265 |
| C            | 11.482715 | 12.163550 | 10.470599 | Si | 14.598465 | 8.011472  | 14.908284 |
| N            | 11.070966 | 12.504802 | 14.141579 | C  | 13.468562 | 7.969370  | 13.395995 |
| C            | 11.480956 | 11.640270 | 15.136234 | C  | 10.605264 | 6.484464  | 18.437344 |
| N            | 10.563513 | 11.799457 | 16.179814 | C  | 11.889287 | 4.947192  | 16.088743 |
| C            | 9.638784  | 12.794311 | 15.838780 | C  | 7.640002  | 11.782222 | 18.694889 |
| C            | 9.938122  | 13.208872 | 14.584313 | C  | 14.669398 | 12.960801 | 17.688500 |
| C            | 10.862248 | 10.998657 | 17.326687 | C  | 15.704972 | 6.471624  | 14.880577 |
| Si           | 12.505187 | 10.205103 | 16.824944 | C  | 15.691984 | 9.550480  | 14.796030 |
| Si           | 13.328354 | 8.033719  | 16.917658 | C  | 15.137703 | 5.664532  | 18.650175 |
| Si           | 14.709681 | 7.507349  | 18.760583 | C  | 16.296627 | 8.533589  | 18.661653 |
| C            | 13.902874 | 7.807580  | 20.439875 | H  | 8.867778  | 13.129558 | 16.510873 |

|   |           |           |           |   |           |           |           |
|---|-----------|-----------|-----------|---|-----------|-----------|-----------|
| H | 9.473831  | 13.957442 | 13.963058 | H | 15.449368 | 14.586747 | 12.922115 |
| H | 9.523370  | 9.851339  | 20.241465 | H | 15.588595 | 12.860012 | 13.321187 |
| H | 11.694638 | 10.285422 | 21.173685 | H | 15.669739 | 14.084205 | 14.601392 |
| H | 13.297804 | 11.713181 | 20.127167 | H | 13.247635 | 15.848982 | 13.524343 |
| H | 8.305518  | 10.858744 | 16.865578 | H | 13.623097 | 15.452993 | 15.214431 |
| H | 8.114995  | 12.758517 | 18.548293 | H | 12.034463 | 15.045878 | 14.537646 |
| H | 7.644227  | 11.577429 | 19.771174 | H | 13.735182 | 8.874554  | 20.610662 |
| H | 6.597709  | 11.849735 | 18.360219 | H | 14.559103 | 7.424604  | 21.233036 |
| H | 8.212512  | 8.504741  | 17.646999 | H | 12.934728 | 7.302682  | 20.523474 |
| H | 6.663183  | 9.342045  | 17.882268 | H | 15.594309 | 5.399797  | 17.691213 |
| H | 7.730721  | 9.045952  | 19.262902 | H | 14.239927 | 5.047783  | 18.776334 |
| H | 12.815171 | 13.107312 | 16.642533 | H | 15.842006 | 5.396303  | 19.448603 |
| H | 15.065828 | 12.183243 | 17.026453 | H | 16.862437 | 8.315781  | 17.749035 |
| H | 15.057757 | 12.782637 | 18.698243 | H | 16.944797 | 8.318342  | 19.520970 |
| H | 15.048413 | 13.930532 | 17.345929 | H | 16.067742 | 9.605590  | 18.668466 |
| H | 12.847185 | 14.020018 | 19.566554 | H | 9.935308  | 8.474559  | 15.846856 |
| H | 11.439549 | 14.051812 | 18.492179 | H | 9.260531  | 6.868918  | 15.498746 |
| H | 12.857418 | 15.061318 | 18.130164 | H | 10.601756 | 7.508410  | 14.526269 |
| H | 10.952327 | 11.764402 | 9.611707  | H | 10.391129 | 7.469273  | 18.867697 |
| H | 13.128055 | 12.876587 | 9.282596  | H | 11.257619 | 5.943531  | 19.132882 |
| H | 14.388252 | 13.752209 | 11.213545 | H | 9.660969  | 5.929726  | 18.359873 |
| H | 9.055681  | 11.830579 | 12.747006 | H | 12.323463 | 5.009117  | 15.084212 |
| H | 9.170054  | 10.551505 | 9.966095  | H | 11.001506 | 4.303659  | 16.032848 |
| H | 8.542031  | 12.178951 | 10.291002 | H | 12.621110 | 4.457155  | 16.740787 |
| H | 7.761190  | 10.758076 | 11.009772 | H | 12.830663 | 8.858655  | 13.388043 |
| H | 10.446491 | 9.280975  | 11.778355 | H | 12.832800 | 7.076824  | 13.380683 |
| H | 8.979347  | 9.361686  | 12.779534 | H | 14.073747 | 7.968274  | 12.479430 |
| H | 10.535597 | 9.914142  | 13.427039 | H | 15.123347 | 5.550944  | 15.003950 |
| H | 13.504464 | 13.020372 | 14.689740 | H | 16.462063 | 6.501937  | 15.672813 |

|           |           |           |           |    |           |           |           |
|-----------|-----------|-----------|-----------|----|-----------|-----------|-----------|
| H         | 16.231743 | 6.412056  | 13.918835 | C  | -2.001383 | -2.020602 | -0.262936 |
| H         | 16.324673 | 9.494388  | 13.900008 | C  | -0.995701 | -2.912492 | -0.089591 |
| H         | 16.348073 | 9.659082  | 15.666759 | C  | -1.922476 | 0.599332  | -0.527460 |
| H         | 15.060918 | 10.442248 | 14.717328 | Si | -0.203426 | 1.562295  | -0.526306 |
| H         | 8.196286  | 17.066158 | 14.478389 | Si | 0.628870  | 3.523765  | 0.367679  |
| C         | 6.175693  | 15.468668 | 13.550840 | Si | 0.369180  | 5.478371  | -0.932542 |
| H         | 5.890057  | 14.412050 | 13.596823 | C  | -1.423007 | 5.885099  | -1.365613 |
| H         | 5.441808  | 15.977291 | 12.913227 | N  | 0.761837  | 0.168722  | -0.152771 |
| H         | 6.094768  | 15.891382 | 14.556630 | C  | 1.988309  | -2.220445 | -2.298925 |
| C         | 7.572040  | 15.631019 | 12.998552 | C  | 1.065626  | -3.188322 | -3.067044 |
| C         | 7.982355  | 14.909562 | 11.867485 | C  | 0.936146  | -3.110063 | 2.601866  |
| C         | 9.269749  | 15.053363 | 11.351947 | C  | 0.998100  | -1.659324 | 3.127007  |
| C         | 10.178249 | 15.921023 | 11.961364 | C  | -3.252459 | 0.980566  | -0.023272 |
| C         | 9.783235  | 16.648345 | 13.083567 | C  | -3.913832 | 0.185513  | 1.098138  |
| C         | 8.491235  | 16.503453 | 13.595289 | C  | -4.294594 | 1.073270  | 2.299289  |
| H         | 7.288230  | 14.217017 | 11.396181 | C  | -3.861613 | 2.072030  | -0.554651 |
| H         | 9.576989  | 14.472667 | 10.487817 | C  | -3.313855 | 2.776390  | -1.691077 |
| H         | 11.188661 | 16.009952 | 11.574064 | C  | -2.218802 | 2.336367  | -2.355152 |
| H         | 10.484376 | 17.318965 | 13.572870 | C  | -1.400903 | 1.182979  | -1.939770 |
| <b>B"</b> |           |           |           | C  | -0.990182 | 0.203025  | -3.050827 |
| C         | 1.875748  | -3.268590 | 1.414133  | C  | -2.205634 | -0.339663 | -3.818444 |
| C         | 1.523598  | -2.770412 | 0.146636  | C  | 3.177801  | -1.805207 | -3.176509 |
| C         | 2.399399  | -2.804240 | -0.954032 | C  | 1.206773  | -4.098522 | 3.744580  |
| C         | 3.650123  | -3.400272 | -0.765580 | Si | -0.355874 | 3.650254  | 2.507907  |
| C         | 4.012214  | -3.933907 | 0.469164  | C  | -0.484060 | 1.910371  | 3.237283  |
| C         | 3.137480  | -3.860514 | 1.549560  | Si | 2.920616  | 2.898980  | 0.495518  |
| N         | 0.214562  | -2.203061 | -0.027724 | C  | 3.197701  | 1.631176  | 1.866158  |
| C         | -0.051271 | -0.852323 | -0.140878 | C  | -2.087968 | 4.396118  | 2.355962  |
| N         | -1.431871 | -0.742589 | -0.276900 | C  | 0.694441  | 4.720730  | 3.664274  |

|   |           |           |           |   |           |           |           |
|---|-----------|-----------|-----------|---|-----------|-----------|-----------|
| C | -5.164923 | -0.554377 | 0.578660  | H | 2.163025  | -3.891820 | 4.239135  |
| C | 0.046039  | 0.838438  | -3.988316 | H | 1.223059  | -5.134876 | 3.391771  |
| C | 3.968772  | 4.436645  | 0.857627  | H | 0.421427  | -4.006143 | 4.502433  |
| C | 3.484294  | 2.144236  | -1.143988 | H | 1.998100  | -1.444762 | 3.525119  |
| C | 1.053303  | 6.927294  | 0.078760  | H | 0.267399  | -1.512034 | 3.930096  |
| C | 1.353453  | 5.299574  | -2.538459 | H | 0.792098  | -0.934728 | 2.334992  |
| H | -3.058461 | -2.187368 | -0.380105 | H | 1.423174  | -1.306685 | -2.082722 |
| H | -1.014203 | -3.988025 | -0.020445 | H | 3.748099  | -2.671050 | -3.530141 |
| H | -4.806893 | 2.416311  | -0.144899 | H | 3.859092  | -1.138550 | -2.636488 |
| H | -3.843997 | 3.650484  | -2.059443 | H | 2.808368  | -1.272284 | -4.059752 |
| H | -1.915513 | 2.834904  | -3.274959 | H | 1.595535  | -4.118286 | -3.301108 |
| H | -3.197545 | -0.559226 | 1.462829  | H | 0.739942  | -2.732465 | -4.009205 |
| H | -4.940376 | -1.165708 | -0.301754 | H | 0.175915  | -3.442135 | -2.484013 |
| H | -5.931106 | 0.170151  | 0.283264  | H | -1.841406 | 5.143467  | -2.051178 |
| H | -5.584993 | -1.204688 | 1.355601  | H | -1.466258 | 6.870177  | -1.849422 |
| H | -3.417584 | 1.571074  | 2.718011  | H | -2.061688 | 5.912237  | -0.476892 |
| H | -4.754624 | 0.462874  | 3.084875  | H | 2.089104  | 6.763718  | 0.396152  |
| H | -5.017180 | 1.844249  | 2.008668  | H | 0.448269  | 7.091949  | 0.977381  |
| H | -0.501747 | -0.650477 | -2.566884 | H | 1.020886  | 7.849303  | -0.517068 |
| H | 0.916057  | 1.184595  | -3.416927 | H | 2.423711  | 5.172711  | -2.342470 |
| H | -0.371339 | 1.696029  | -4.528183 | H | 1.227252  | 6.191811  | -3.165304 |
| H | 0.391141  | 0.112835  | -4.734179 | H | 1.012000  | 4.430027  | -3.112520 |
| H | -2.718956 | 0.464798  | -4.356944 | H | -1.021036 | 1.235510  | 2.562665  |
| H | -2.925555 | -0.798635 | -3.132081 | H | -1.018605 | 1.934047  | 4.194833  |
| H | -1.896580 | -1.097870 | -4.547929 | H | 0.507906  | 1.481777  | 3.410419  |
| H | 3.442338  | -4.263948 | 2.509549  | H | -2.692634 | 3.835945  | 1.633532  |
| H | 4.987187  | -4.399218 | 0.592969  | H | -2.040104 | 5.439318  | 2.022357  |
| H | 4.351559  | -3.448841 | -1.592998 | H | -2.603789 | 4.374715  | 3.324654  |
| H | -0.084228 | -3.290729 | 2.246068  | H | 1.690445  | 4.284814  | 3.805028  |

|           |           |           |           |    |           |           |           |
|-----------|-----------|-----------|-----------|----|-----------|-----------|-----------|
| H         | 0.219931  | 4.801408  | 4.650968  | C  | -2.215651 | -6.189622 | 1.508981  |
| H         | 0.825942  | 5.733373  | 3.268461  | C  | -0.863042 | -6.245687 | 1.876028  |
| H         | 2.603396  | 0.734425  | 1.659291  | C  | 0.139933  | -6.346920 | 0.911593  |
| H         | 2.919425  | 2.020282  | 2.852803  | C  | -0.191758 | -6.398732 | -0.443478 |
| H         | 4.257519  | 1.348186  | 1.901278  | C  | -1.533989 | -6.356566 | -0.822902 |
| H         | 3.638009  | 4.948465  | 1.769843  | C  | -3.292192 | -6.022605 | 2.554791  |
| H         | 3.928300  | 5.157274  | 0.031662  | C  | 1.895410  | -3.324531 | 1.170966  |
| H         | 5.018200  | 4.146501  | 0.995280  | C  | 1.306232  | -2.848941 | -0.020463 |
| H         | 4.560314  | 1.929000  | -1.108308 | C  | 1.910299  | -3.007202 | -1.280138 |
| H         | 3.299376  | 2.812290  | -1.992198 | C  | 3.152913  | -3.650507 | -1.328008 |
| H         | 2.950419  | 1.203085  | -1.317424 | C  | 3.761364  | -4.121315 | -0.169708 |
| H         | -2.767847 | -6.461457 | -1.488089 | C  | 3.134870  | -3.963111 | 1.064839  |
| C         | -3.243063 | -6.624796 | 1.203380  | C  | 1.213549  | -3.144173 | 2.524621  |
| H         | -3.296683 | -5.941433 | 2.057606  | C  | 1.749859  | -4.082273 | 3.616061  |
| H         | -3.385344 | -7.641560 | 1.590029  | N  | 0.032899  | -2.190409 | 0.057006  |
| H         | -4.077451 | -6.402444 | 0.531255  | C  | -0.180619 | -0.843873 | -0.192094 |
| C         | -1.917032 | -6.501034 | 0.490489  | N  | -1.550150 | -0.622102 | 0.111416  |
| C         | -0.716943 | -6.452732 | 1.215640  | C  | -2.149399 | -1.849069 | 0.443498  |
| C         | 0.511491  | -6.338771 | 0.565890  | C  | -1.181983 | -2.793020 | 0.419982  |
| C         | 0.565010  | -6.266299 | -0.827656 | C  | 1.214578  | -2.575180 | -2.563782 |
| C         | -0.619348 | -6.317679 | -1.562047 | C  | 2.178986  | -1.952077 | -3.584799 |
| C         | -1.847958 | -6.434753 | -0.906830 | N  | 0.607010  | 0.064693  | -0.673549 |
| H         | -0.749103 | -6.491762 | 2.302142  | Si | -0.390691 | 1.494329  | -0.898450 |
| H         | 1.428689  | -6.282985 | 1.143384  | C  | -0.894230 | 1.785148  | -2.679830 |
| H         | 1.520801  | -6.149763 | -1.329724 | C  | -0.059443 | 1.226290  | -3.823075 |
| H         | -0.591334 | -6.250085 | -2.646323 | C  | 1.160151  | 2.130079  | -4.094117 |
| <b>B'</b> |           |           |           | C  | -1.964958 | 0.678932  | -0.222793 |
|           |           |           |           | C  | -3.208284 | 1.230511  | -0.078203 |
| C         | -2.534710 | -6.253107 | 0.146059  | C  | -3.517369 | 2.463321  | -0.758213 |

|    |           |           |           |   |           |           |           |
|----|-----------|-----------|-----------|---|-----------|-----------|-----------|
| C  | -3.021614 | 2.978111  | -1.931527 | H | -6.118799 | -0.625534 | 0.435711  |
| C  | -2.051461 | 2.474509  | -2.881480 | H | -4.283205 | 2.083575  | 2.333896  |
| Si | 0.533739  | 3.306177  | 0.302188  | H | -5.702581 | 1.017684  | 2.354871  |
| Si | 2.815137  | 2.719284  | 0.595056  | H | -5.596971 | 2.317878  | 1.164711  |
| C  | 3.603487  | 2.158268  | -1.030445 | H | 0.333456  | 0.264560  | -3.469390 |
| Si | 0.468025  | 5.447275  | -0.707521 | H | 1.738419  | 2.300945  | -3.181969 |
| C  | 1.758008  | 5.585931  | -2.087213 | H | 0.832079  | 3.102517  | -4.478987 |
| Si | -0.527354 | 3.417013  | 2.415568  | H | 1.824762  | 1.670441  | -4.834861 |
| C  | 0.590619  | 4.283136  | 3.677758  | H | -1.174293 | 1.898057  | -5.585748 |
| C  | -1.213369 | 5.896716  | -1.442596 | H | -1.718260 | 0.339591  | -4.935189 |
| C  | 0.885309  | 6.744353  | 0.612485  | H | -0.195237 | 0.450449  | -5.844736 |
| C  | 0.445201  | -3.763911 | -3.173931 | H | 3.621471  | -4.342321 | 1.957563  |
| C  | 1.299980  | -1.683091 | 3.005835  | H | 4.726191  | -4.618509 | -0.226400 |
| C  | -4.318730 | 0.578285  | 0.745088  | H | 3.644576  | -3.792600 | -2.285583 |
| C  | -5.352537 | -0.117012 | -0.161517 | H | 0.151631  | -3.381387 | 2.391590  |
| C  | -5.012051 | 1.565142  | 1.703579  | H | 2.774109  | -3.820427 | 3.905465  |
| C  | -0.837828 | 0.964224  | -5.120198 | H | 1.742166  | -5.129335 | 3.296964  |
| C  | -0.923055 | 1.695063  | 3.093738  | H | 1.123862  | -3.994020 | 4.510256  |
| C  | -2.140026 | 4.398717  | 2.271797  | H | 2.343462  | -1.396235 | 3.171292  |
| C  | 2.997222  | 1.285552  | 1.808547  | H | 0.754213  | -1.564040 | 3.948597  |
| C  | 3.796137  | 4.202208  | 1.258127  | H | 0.873130  | -0.993315 | 2.275685  |
| H  | -3.200633 | -1.955739 | 0.644396  | H | 0.486992  | -1.803072 | -2.308251 |
| H  | -1.239517 | -3.854285 | 0.601397  | H | 2.914171  | -2.676395 | -3.952638 |
| H  | -4.364837 | 3.015770  | -0.355714 | H | 2.714230  | -1.104975 | -3.144764 |
| H  | -3.547601 | 3.865300  | -2.284715 | H | 1.616342  | -1.590423 | -4.452585 |
| H  | -2.312923 | 2.730088  | -3.912838 | H | 1.130728  | -4.577581 | -3.438172 |
| H  | -3.850391 | -0.178610 | 1.383326  | H | -0.081586 | -3.449189 | -4.082517 |
| H  | -4.874772 | -0.854899 | -0.815166 | H | -0.291413 | -4.156123 | -2.465848 |
| H  | -5.850373 | 0.620780  | -0.801516 | H | -1.431859 | 5.281374  | -2.320761 |



H -1.208408 6.950272 -1.752882  
H -2.026582 5.752222 -0.724050  
H 1.844483 6.539422 1.099530  
H 0.115189 6.787244 1.391113  
H 0.946284 7.737237 0.147519  
H 2.773119 5.407293 -1.715750  
H 1.731797 6.594200 -2.521737  
H 1.562366 4.866697 -2.888912  
H -1.603017 1.149806 2.431926  
H -1.400673 1.783200 4.078819  
H -0.015180 1.094639 3.211028  
H -2.782730 3.981554 1.489780  
H -1.946149 5.448146 2.021651  
H -2.691447 4.373735 3.220842  
H 1.508120 3.709997 3.854066  
H 0.066282 4.379771 4.638022  
H 0.879244 5.286340 3.347545  
H 2.541294 0.391601 1.373100  
H 2.521359 1.481431 2.775491  
H 4.060401 1.077689 1.988798  
H 3.382069 4.573358 2.201854  
H 3.810962 5.035149 0.546120  
H 4.836522 3.901594 1.441206  
H 4.655516 1.894243 -0.857336  
H 3.574898 2.935171 -1.801860  
H 3.085359 1.268300 -1.404865  
H -3.577931 -6.214478 -0.159783  
H -3.388409 -4.967915 2.844183  
H -3.056896 -6.588847 3.461838

H -4.265402 -6.354593 2.181304  
H -0.594970 -6.199824 2.929066  
H 1.182631 -6.370865 1.212447  
H 0.590955 -6.462016 -1.193539  
H -1.804405 -6.397390 -1.874608

**KSiTMS<sub>3</sub>**

Si 13.816203 10.249893 17.506301  
Si 15.371062 10.608918 19.248883  
Si 13.341862 7.939513 17.648004  
Si 15.126357 10.441542 15.549302  
C 16.363726 12.226494 18.961735  
C 14.449822 10.841980 20.918238  
C 16.668395 9.229869 19.556054  
C 14.747218 6.737612 17.136635  
C 11.845670 7.495092 16.529947  
C 12.833637 7.451099 19.432853  
C 14.263851 9.598112 14.057294  
C 16.901074 9.716964 15.623128  
C 15.335014 12.289409 15.067825  
H 17.013724 12.139259 18.078190  
H 17.000491 12.454306 19.832085  
H 15.687979 13.079426 18.795917  
H 13.844375 9.955451 21.160065  
H 13.771636 11.708374 20.868786  
H 15.159932 11.010282 21.744333  
H 16.178052 8.288321 19.845430  
H 17.360402 9.517278 20.364801  
H 17.257184 9.035381 18.648139  
H 15.014523 6.876740 16.078338

|                            |           |           |           |   |           |           |           |
|----------------------------|-----------|-----------|-----------|---|-----------|-----------|-----------|
| H                          | 14.433976 | 5.689281  | 17.273697 | C | 14.719151 | 6.590305  | 17.247726 |
| H                          | 15.652753 | 6.909619  | 17.736238 | C | 11.870157 | 7.548952  | 16.519070 |
| H                          | 12.057644 | 7.733868  | 15.476680 | C | 14.162442 | 9.659092  | 14.017009 |
| H                          | 10.952315 | 8.064454  | 16.830062 | C | 16.913956 | 9.710519  | 15.421277 |
| H                          | 11.607080 | 6.420980  | 16.597386 | H | 16.976332 | 12.286486 | 18.160118 |
| H                          | 13.676706 | 7.564364  | 20.130722 | H | 16.823624 | 12.693693 | 19.879289 |
| H                          | 12.499838 | 6.401285  | 19.468736 | H | 15.520170 | 13.109886 | 18.749586 |
| H                          | 12.011013 | 8.086241  | 19.795793 | H | 13.933564 | 9.863385  | 21.161552 |
| H                          | 13.237867 | 9.975732  | 13.928182 | H | 13.556898 | 11.536099 | 20.716347 |
| H                          | 14.203818 | 8.508870  | 14.199779 | H | 14.972148 | 11.185671 | 21.730576 |
| H                          | 14.821273 | 9.789995  | 13.125927 | H | 16.366536 | 8.403281  | 19.889992 |
| H                          | 16.876513 | 8.646628  | 15.874134 | H | 17.457998 | 9.678078  | 20.459009 |
| H                          | 17.502117 | 10.226499 | 16.390894 | H | 17.429705 | 9.236481  | 18.742546 |
| H                          | 17.413498 | 9.835546  | 14.654025 | H | 15.030912 | 6.711538  | 16.203817 |
| H                          | 15.945259 | 12.393238 | 14.155897 | H | 14.379598 | 5.554563  | 17.377695 |
| H                          | 15.826803 | 12.852949 | 15.875139 | H | 15.601251 | 6.735770  | 17.881880 |
| H                          | 14.355040 | 12.755393 | 14.880158 | H | 12.169958 | 7.673737  | 15.473223 |
| K                          | 11.293117 | 12.287515 | 17.680461 | H | 11.072937 | 8.270473  | 16.729256 |
| <b>BrSiTMS<sub>3</sub></b> |           |           |           | H | 11.457202 | 6.538714  | 16.637219 |
| C                          | 16.270158 | 12.349951 | 18.995823 | H | 13.594009 | 7.514581  | 20.172925 |
| Si                         | 15.460383 | 10.677929 | 19.344654 | H | 12.309708 | 6.467070  | 19.541722 |
| C                          | 16.803779 | 9.374503  | 19.631544 | H | 12.005308 | 8.198863  | 19.782239 |
| Si                         | 14.146920 | 10.003565 | 17.497829 | H | 13.124059 | 10.008898 | 14.033635 |
| Br                         | 12.270430 | 11.353066 | 17.547201 | H | 14.152999 | 8.565990  | 14.094384 |
| Si                         | 13.327371 | 7.794320  | 17.694601 | H | 14.593895 | 9.924774  | 13.043312 |
| C                          | 12.757164 | 7.466684  | 19.466841 | H | 16.898329 | 8.632056  | 15.615915 |
| Si                         | 15.168503 | 10.444320 | 15.411502 | H | 17.540523 | 10.182107 | 16.187135 |
| C                          | 15.262590 | 12.309744 | 15.132065 | H | 17.397727 | 9.869116  | 14.448706 |
| C                          | 14.374723 | 10.826230 | 20.882687 | H | 15.695826 | 12.519961 | 14.145598 |

H 15.884215 12.800638 15.888319

H 14.265659 12.762686 15.170360

**KBr**

Br 0.000000 0.000000 -0.492015

K 0.000000 0.000000 2.492015

**Ts\_1**

C 4.119678 19.568773 9.603595

C 5.415419 19.168820 9.977282

C 6.543355 19.996845 9.844193

C 6.344706 21.264387 9.287682

C 5.077698 21.681267 8.887261

C 3.976682 20.844369 9.046597

N 5.588135 17.849709 10.526636

C 5.763506 17.585582 11.881674

N 5.813728 16.199137 11.956277

C 5.647727 15.641241 10.688581

C 5.513345 16.658954 9.806733

C 5.893882 15.437086 13.174532

C 7.159169 15.196617 13.740151

C 7.203524 14.407773 14.892532

C 6.036027 13.897587 15.458839

C 4.797618 14.180702 14.893678

C 4.698987 14.965722 13.738602

C 8.418667 15.788989 13.121616

C 9.555354 15.975966 14.137402

C 3.335438 15.311432 13.159348

C 2.592416 14.051354 12.677372

N 5.858685 18.464334 12.807460

Si 6.170199 19.308833 14.169920

Br 8.489135 19.557295 14.383627

C 7.923569 19.516545 10.271911

C 8.871721 20.663373 10.649928

C 2.911959 18.682520 9.877958

C 1.769462 18.864942 8.867824

C 8.555159 18.624713 9.182998

C 2.419353 18.924069 11.319448

Br 5.625438 21.445704 13.373786

Br 5.778997 17.815509 15.872332

C 2.494870 16.103146 14.178177

C 8.909152 14.945695 11.925708

Si 4.756923 21.099753 16.927281

Si 4.265136 23.418511 16.868591

C 5.824566 24.525160 16.659812

Si 2.606308 20.177984 16.646539

C 1.196667 21.203779 17.415744

K 7.771528 22.115404 16.228576

Si 5.238249 20.672719 19.193624

C 3.819293 20.941713 20.434247

C 2.212932 20.002346 14.799058

C 2.412755 18.458171 17.433762

C 6.676816 21.781094 19.797982

C 5.826906 18.885271 19.457327

C 3.190049 23.880718 15.371293

C 3.428467 24.150943 18.413929

H 5.646134 14.573246 10.544363

H 5.380279 16.655988 8.737188

H 8.157590 14.200695 15.365764

H 6.094316 13.290306 16.358244

|   |           |           |           |   |          |           |           |
|---|-----------|-----------|-----------|---|----------|-----------|-----------|
| H | 3.892717  | 13.801729 | 15.360992 | H | 1.305552 | 19.853867 | 8.953156  |
| H | 8.153317  | 16.784582 | 12.745530 | H | 0.988802 | 18.121037 | 9.059147  |
| H | 8.144301  | 14.862338 | 11.147903 | H | 2.120144 | 18.738873 | 7.837627  |
| H | 9.174699  | 13.935036 | 12.256069 | H | 1.407688 | 18.069810 | 17.217478 |
| H | 9.797368  | 15.406946 | 11.479174 | H | 0.235115 | 20.700875 | 17.240449 |
| H | 9.210954  | 16.520187 | 15.021432 | H | 2.524897 | 18.506033 | 18.523175 |
| H | 10.365945 | 16.550595 | 13.677101 | H | 1.329769 | 21.307739 | 18.498407 |
| H | 9.971775  | 15.013782 | 14.457538 | H | 3.143426 | 17.740889 | 17.049978 |
| H | 3.487524  | 15.958409 | 12.289733 | H | 1.228226 | 19.542486 | 14.640618 |
| H | 3.028801  | 16.996525 | 14.509645 | H | 1.128278 | 22.210662 | 16.990268 |
| H | 2.269620  | 15.496901 | 15.062648 | H | 4.083980 | 24.076352 | 19.289832 |
| H | 1.545596  | 16.413130 | 13.727856 | H | 2.960403 | 19.372061 | 14.305494 |
| H | 1.628985  | 14.326331 | 12.233626 | H | 2.226306 | 20.972981 | 14.290970 |
| H | 2.397831  | 13.367099 | 13.510977 | H | 5.523689 | 25.579929 | 16.708136 |
| H | 3.177845  | 13.510994 | 11.925791 | H | 2.494775 | 23.632010 | 18.652248 |
| H | 7.188168  | 21.936625 | 9.169267  | H | 3.199847 | 25.214095 | 18.254312 |
| H | 4.945985  | 22.670169 | 8.455920  | H | 5.053945 | 18.166731 | 19.163331 |
| H | 2.993352  | 21.191762 | 8.745409  | H | 6.307783 | 24.390098 | 15.681065 |
| H | 7.789985  | 18.907888 | 11.171993 | H | 6.717377 | 18.665252 | 18.857506 |
| H | 8.707556  | 19.195823 | 8.259807  | H | 6.566708 | 24.378154 | 17.457609 |
| H | 7.919233  | 17.764607 | 8.952105  | H | 2.976145 | 20.277332 | 20.212271 |
| H | 9.527891  | 18.247782 | 9.519101  | H | 6.070043 | 18.712236 | 20.514930 |
| H | 9.157056  | 21.261562 | 9.776586  | H | 3.070012 | 24.971015 | 15.310804 |
| H | 9.788921  | 20.250313 | 11.082174 | H | 3.650496 | 23.533247 | 14.440161 |
| H | 8.410829  | 21.322045 | 11.392608 | H | 3.445810 | 21.970460 | 20.408776 |
| H | 3.235408  | 17.637269 | 9.814992  | H | 7.617235 | 21.544782 | 19.279297 |
| H | 2.058303  | 19.951678 | 11.434655 | H | 4.157536 | 20.723910 | 21.457101 |
| H | 3.226900  | 18.776080 | 12.041057 | H | 2.191455 | 23.435814 | 15.432302 |
| H | 1.599935  | 18.239951 | 11.567341 | H | 6.464799 | 22.848143 | 19.654406 |

H 6.861937 21.622881 20.869063

**Int\_1**

C 6.028758 14.880880 17.824498

C 6.300431 13.739481 17.046834

C 5.679548 12.499076 17.266971

C 4.794691 12.405435 18.347681

C 4.530400 13.506854 19.153386

C 5.131125 14.734935 18.885100

N 7.313249 13.829458 16.024937

C 7.207504 14.429020 14.774368

N 8.483866 14.319750 14.237369

C 9.331539 13.652695 15.120596

C 8.611727 13.352993 16.222168

C 8.875754 14.790074 12.935183

C 8.913093 13.868849 11.874491

C 9.362785 14.337598 10.633555

C 9.745873 15.664322 10.467296

C 9.684206 16.557438 11.535725

C 9.243495 16.142530 12.795790

C 8.526947 12.408049 12.067329

C 7.673271 11.851523 10.915772

C 9.178841 17.099826 13.981695

C 10.411234 16.936935 14.897353

N 6.209268 15.022415 14.197726

Si 4.606283 14.804419 13.824147

Si 3.611601 16.363771 12.397043

Si 3.457689 18.395585 13.596833

C 2.068728 18.356217 14.878330

C 5.929304 11.294695 16.371175

C 4.614230 10.599435 15.973032

C 6.686667 16.220006 17.520054

C 8.083540 16.315308 18.167410

C 6.883935 10.285467 17.041486

C 5.819457 17.418622 17.936020

Br 4.371827 12.713053 12.876545

Br 3.223741 14.717811 15.662198

C 9.043455 18.575630 13.575448

C 9.789546 11.540755 12.256134

Si 1.487776 15.536819 11.747715

C 0.465490 16.998842 11.104958

C 1.672687 14.266302 10.357481

C 0.539210 14.726512 13.164105

Si 4.932991 16.675815 10.461903

C 3.880304 17.459427 9.094059

C 6.378376 17.829481 10.837526

C 5.638854 15.031729 9.865863

C 3.101626 19.812412 12.388808

C 5.105853 18.724480 14.463700

H 10.364741 13.470239 14.877570

H 8.891003 12.865712 17.140935

H 9.969374 17.592990 11.380504

H 10.087369 16.010428 9.495302

H 9.403987 13.657813 9.787812

H 8.284897 16.834787 14.558999

H 8.223307 18.732742 12.870541

H 9.965674 18.951986 13.118239

H 8.847823 19.180483 14.467140

|   |           |           |           |             |           |           |           |
|---|-----------|-----------|-----------|-------------|-----------|-----------|-----------|
| H | 10.496970 | 15.920951 | 15.289995 | H           | 2.283106  | 13.418634 | 10.687137 |
| H | 10.339646 | 17.622489 | 15.749314 | H           | 1.053460  | 13.829105 | 13.522435 |
| H | 11.327205 | 17.172175 | 14.343357 | H           | 2.141575  | 14.695695 | 9.465839  |
| H | 7.926459  | 12.339011 | 12.980420 | H           | -0.504682 | 16.642395 | 10.734632 |
| H | 10.393313 | 11.883332 | 13.102063 | H           | 0.423746  | 15.404693 | 14.015768 |
| H | 10.414636 | 11.578503 | 11.356796 | H           | 6.987750  | 17.405224 | 11.640592 |
| H | 9.509563  | 10.496755 | 12.436241 | H           | 0.970018  | 17.518925 | 10.283447 |
| H | 7.363785  | 10.828159 | 11.153301 | H           | 0.272854  | 17.729604 | 11.898746 |
| H | 8.235553  | 11.818199 | 9.975997  | H           | 6.339344  | 14.644568 | 10.612295 |
| H | 6.772898  | 12.450325 | 10.762588 | H           | 6.043913  | 18.825670 | 11.146004 |
| H | 4.889707  | 15.591798 | 19.505839 | H           | 7.022658  | 17.942606 | 9.956397  |
| H | 3.836952  | 13.415072 | 19.985228 | H           | 3.895014  | 19.917270 | 11.640498 |
| H | 4.295694  | 11.462205 | 18.548735 | H           | 6.189855  | 15.164816 | 8.925673  |
| H | 6.813327  | 16.278531 | 16.433406 | H           | 2.156146  | 19.656146 | 11.857280 |
| H | 5.751672  | 17.510850 | 19.025769 | H           | 4.859619  | 14.278847 | 9.708465  |
| H | 4.806234  | 17.332341 | 17.531628 | H           | 5.901896  | 18.911598 | 13.736289 |
| H | 6.264345  | 18.343312 | 17.554465 | H           | 3.027542  | 20.761613 | 12.935546 |
| H | 8.004392  | 16.240443 | 19.257595 | H           | 3.446529  | 18.412386 | 9.417636  |
| H | 8.550071  | 17.276263 | 17.921842 | H           | 4.505780  | 17.655690 | 8.213031  |
| H | 8.744955  | 15.517995 | 17.815005 | H           | 5.407895  | 17.862700 | 15.066968 |
| H | 6.403451  | 11.654836 | 15.451854 | H           | 1.093839  | 18.189036 | 14.405043 |
| H | 6.445802  | 9.905517  | 17.971395 | H           | 5.031174  | 19.597884 | 15.124037 |
| H | 7.849697  | 10.739677 | 17.284127 | H           | 3.058995  | 16.805427 | 8.781166  |
| H | 7.064529  | 9.434475  | 16.375154 | H           | 2.228356  | 17.557972 | 15.609836 |
| H | 4.155170  | 10.094355 | 16.830341 | H           | 2.024052  | 19.314312 | 15.413177 |
| H | 4.813799  | 9.842732  | 15.207328 | <b>Ts_2</b> |           |           |           |
| H | 3.898393  | 11.318592 | 15.567248 | C           | 1.218478  | 2.799379  | 3.040799  |
| H | 0.684408  | 13.884420 | 10.068594 | C           | 1.393800  | 1.400594  | 3.086665  |
| H | -0.460183 | 14.436936 | 12.812410 | C           | 0.381684  | 0.517271  | 3.503543  |

|    |           |           |           |    |           |           |           |
|----|-----------|-----------|-----------|----|-----------|-----------|-----------|
| C  | -0.869130 | 1.061309  | 3.814797  | Br | 0.734238  | -2.399206 | -1.331231 |
| C  | -1.082707 | 2.432157  | 3.747247  | Si | 1.149798  | 1.068118  | -2.514719 |
| C  | -0.046620 | 3.289923  | 3.382187  | Si | -0.825912 | 1.306863  | -3.781583 |
| C  | 0.644107  | -0.970032 | 3.710004  | C  | -1.972266 | 2.659847  | -3.119620 |
| C  | -0.273800 | -1.868101 | 2.868099  | Si | 2.728401  | -0.071562 | -3.849605 |
| N  | 2.664116  | 0.824990  | 2.732348  | C  | 4.022002  | -0.904985 | -2.764924 |
| C  | 3.648099  | 0.512372  | 3.676366  | C  | 3.610198  | 1.148781  | -5.007682 |
| C  | 4.511495  | -0.350152 | 3.104634  | C  | 1.908129  | -1.407470 | -4.916006 |
| N  | 4.056968  | -0.621451 | 1.812298  | Si | 1.859725  | 3.230481  | -1.935816 |
| C  | 2.872162  | 0.083913  | 1.552541  | C  | 0.598135  | 3.942289  | -0.718861 |
| C  | 4.751832  | -1.496982 | 0.907948  | C  | 3.565062  | 3.176518  | -1.110855 |
| C  | 5.912883  | -1.015736 | 0.276397  | C  | 1.952853  | 4.410601  | -3.418363 |
| C  | 6.621558  | -1.902448 | -0.543106 | C  | 1.879332  | 5.175771  | 2.346573  |
| C  | 6.178279  | -3.205493 | -0.734224 | Si | -4.697315 | -0.194121 | 0.314464  |
| C  | 5.023065  | -3.656297 | -0.097884 | Si | -5.520503 | -1.870937 | 1.738736  |
| C  | 4.288174  | -2.819067 | 0.746945  | C  | -4.307000 | -2.235810 | 3.149877  |
| C  | 6.424965  | 0.402111  | 0.496871  | Si | -5.917887 | -0.327547 | -1.687734 |
| C  | 6.829282  | 1.104508  | -0.811423 | C  | -5.370368 | -1.811330 | -2.754505 |
| C  | 3.063757  | -3.327159 | 1.500980  | C  | -5.675193 | 1.222157  | -2.747160 |
| C  | 2.472410  | -4.616488 | 0.913712  | C  | -7.780626 | -0.555742 | -1.390803 |
| N  | 2.182973  | 0.073761  | 0.472613  | Si | -5.107112 | 1.882543  | 1.325397  |
| Si | 0.757516  | -0.028665 | -0.419483 | C  | -6.899157 | 2.474976  | 1.116422  |
| Br | -2.013634 | -0.070708 | 0.119000  | C  | -3.959388 | 3.199085  | 0.593865  |
| K  | -2.412343 | -2.906844 | -1.180656 | C  | -4.758380 | 1.760826  | 3.186280  |
| C  | 2.354001  | 3.746134  | 2.655103  | C  | -5.785625 | -3.518011 | 0.815634  |
| C  | 3.438475  | 3.841888  | 3.752736  | C  | -7.195066 | -1.429320 | 2.519448  |
| C  | 7.618579  | 0.398309  | 1.475644  | C  | -0.392117 | 1.789566  | -5.565832 |
| C  | 0.530606  | -1.317736 | 5.208364  | C  | -1.817208 | -0.309551 | -3.814899 |
| C  | 3.382934  | -3.567097 | 2.993560  | H  | -6.048746 | 2.118028  | -2.238419 |

|   |           |           |           |   |           |           |           |
|---|-----------|-----------|-----------|---|-----------|-----------|-----------|
| H | -6.210411 | 1.127564  | -3.701079 | H | 1.203909  | -0.696990 | 5.809111  |
| H | -4.614448 | 1.381725  | -2.964984 | H | 8.455849  | -0.168837 | 1.052640  |
| H | -5.430479 | -2.757663 | -2.201565 | H | -0.491395 | -1.159782 | 5.571614  |
| H | -4.349444 | -1.677443 | -3.132985 | H | 5.405850  | -0.810683 | 3.489455  |
| H | -6.023617 | -1.908235 | -3.631719 | H | 3.616879  | 0.916688  | 4.674033  |
| H | -7.988470 | -1.491565 | -0.859440 | H | 6.010632  | 1.106390  | -1.534807 |
| H | -8.320584 | -0.583229 | -2.347268 | H | 5.616639  | 0.985218  | 0.949871  |
| H | -8.190108 | 0.264674  | -0.791790 | H | 7.102516  | 2.144663  | -0.603321 |
| H | -7.112086 | -0.542608 | 3.157363  | H | -0.055362 | -2.922063 | 3.077187  |
| H | -7.558936 | -2.258917 | 3.141205  | H | 1.672950  | -1.184706 | 3.410298  |
| H | -7.950256 | -1.219203 | 1.754561  | H | -1.676616 | 0.401248  | 4.119091  |
| H | -4.067699 | -1.329865 | 3.717544  | H | 7.521358  | -1.561801 | -1.047157 |
| H | -3.365277 | -2.639834 | 2.762004  | H | 4.326198  | 0.614880  | -5.647304 |
| H | -4.730794 | -2.971261 | 3.846610  | H | -1.327452 | -1.683363 | 3.096933  |
| H | -6.493909 | -3.410867 | -0.013589 | H | 3.717678  | -2.658549 | 3.499488  |
| H | -6.189783 | -4.272295 | 1.503800  | H | 2.903183  | 1.676644  | -5.657961 |
| H | -4.852699 | -3.929929 | 0.407418  | H | 4.165667  | 1.902367  | -4.436880 |
| H | -3.781155 | 1.301542  | 3.364843  | H | 7.694374  | 0.619151  | -1.275964 |
| H | -5.513642 | 1.154768  | 3.698844  | H | 4.347062  | 2.954661  | -1.845775 |
| H | -4.757295 | 2.757120  | 3.647815  | H | 3.808521  | 4.138365  | -0.640583 |
| H | -7.606697 | 1.751725  | 1.537880  | H | -0.128560 | -1.686165 | 1.799425  |
| H | -7.155688 | 2.617391  | 0.060260  | H | 6.732129  | -3.876422 | -1.385728 |
| H | -7.047688 | 3.434834  | 1.630015  | H | 4.166654  | -4.326865 | 3.095926  |
| H | -4.132199 | 4.171370  | 1.074885  | H | -2.059105 | 2.842931  | 3.985106  |
| H | -4.127124 | 3.319193  | -0.482734 | H | 2.487422  | -3.929962 | 3.511513  |
| H | -2.909539 | 2.922250  | 0.739160  | H | 0.972817  | 4.526652  | -3.895549 |
| H | 7.959052  | 1.422432  | 1.665356  | H | 2.294946  | -2.548885 | 1.428376  |
| H | 7.353160  | -0.057486 | 2.434413  | H | 3.597302  | 2.394570  | -0.344406 |
| H | 0.791525  | -2.369464 | 5.372685  | H | 2.673304  | -1.938540 | -5.498589 |



H 2.656605 4.054666 -4.178521  
H 4.479256 -0.191434 -2.075449  
H 4.693635 -4.677131 -0.259795  
H 3.570802 -1.691420 -2.153150  
H 1.178848 -0.993238 -5.620725  
H 2.284207 5.404577 -3.088138  
H -0.234903 4.357556 3.352899  
H 1.040360 5.198141 1.649013  
H 2.824216 3.334254 1.753783  
H 1.394490 -2.136699 -4.280364  
H 3.132741 -5.474322 1.090097  
H 4.820664 -1.350743 -3.371704  
H 1.516074 -4.828871 1.404166  
H 0.859548 4.976188 -0.462452  
H 2.286923 -4.524694 -0.158902  
H 1.575753 5.693699 3.264683  
H 3.976622 2.903651 3.890257  
H 0.556958 3.354466 0.204339  
H -0.408402 3.948297 -1.147844  
H 2.705207 5.744228 1.906039  
H 2.987044 4.130413 4.708965  
H 0.195989 1.018334 -6.074237  
H 0.185449 2.720518 -5.593742  
H 4.171774 4.608609 3.478171  
H -1.188210 -1.167326 -4.074823  
H -2.231035 -0.462840 -2.811008  
H -1.487912 3.642187 -3.147931  
H -1.312878 1.946767 -6.143718  
H -2.277576 2.457433 -2.087675

H -2.650897 -0.250770 -4.526330  
H -2.876316 2.719625 -3.739084

**Int\_2**

Si 13.009846 9.450661 15.684621  
Si 15.341713 9.779868 15.149703  
Si 16.394967 10.689973 17.055059  
Si 16.143061 7.573340 14.892084  
Si 15.752042 11.014133 13.191354  
N 12.260659 10.876432 15.152499  
N 10.167851 11.578208 14.198874  
N 10.381259 11.775776 16.385355  
C 11.059791 11.353782 15.243030  
C 9.115395 12.257821 16.034441  
C 8.980343 12.123023 14.696264  
C 11.036018 11.964948 17.652772  
C 11.060060 10.906213 18.579368  
C 11.769525 11.111274 19.767993  
C 12.424614 12.315998 20.015439  
C 12.366590 13.352031 19.088477  
C 11.664881 13.201012 17.886877  
C 10.294752 9.616752 18.320534  
C 8.842807 9.755004 18.827091  
C 10.964680 8.376659 18.929427  
C 11.617622 14.334009 16.870850  
C 12.981188 14.512018 16.179137  
C 11.134501 15.652308 17.502008  
C 10.527752 11.445264 12.812358  
C 10.623740 10.156676 12.255837

|   |           |           |           |   |           |           |           |
|---|-----------|-----------|-----------|---|-----------|-----------|-----------|
| C | 11.006145 | 10.059232 | 10.913937 | H | 10.422090 | 7.477853  | 18.617661 |
| C | 11.274140 | 11.198269 | 10.158859 | H | 10.954424 | 8.404299  | 20.024910 |
| C | 11.163210 | 12.460774 | 10.732398 | H | 10.891450 | 14.064330 | 16.097941 |
| C | 10.796756 | 12.614455 | 12.074606 | H | 13.296852 | 13.580487 | 15.702471 |
| C | 10.264479 | 8.915212  | 13.058461 | H | 13.748237 | 14.809410 | 16.901966 |
| C | 8.775044  | 8.567567  | 12.854766 | H | 12.917606 | 15.289925 | 15.409879 |
| C | 11.161182 | 7.711099  | 12.734421 | H | 11.044996 | 16.424357 | 16.729532 |
| C | 10.661450 | 14.007227 | 12.676844 | H | 11.838169 | 16.017319 | 18.258131 |
| C | 11.858457 | 14.920462 | 12.359259 | H | 10.156655 | 15.527446 | 17.979591 |
| C | 9.350001  | 14.670800 | 12.206376 | H | 11.096164 | 9.080599  | 10.452664 |
| C | 15.588837 | 10.001986 | 18.627494 | H | 11.573603 | 11.099980 | 9.118779  |
| C | 18.246475 | 10.279138 | 17.086825 | H | 11.375585 | 13.341651 | 10.133349 |
| C | 16.212866 | 12.573258 | 17.112888 | H | 10.408592 | 9.145222  | 14.118454 |
| C | 14.968242 | 6.580322  | 13.781425 | H | 8.574544  | 8.331711  | 11.803273 |
| C | 16.211144 | 6.683969  | 16.566532 | H | 8.131344  | 9.404775  | 13.145531 |
| C | 17.869209 | 7.515819  | 14.108231 | H | 8.501222  | 7.696556  | 13.461075 |
| C | 15.105442 | 10.049339 | 11.692706 | H | 10.984077 | 7.329848  | 11.722363 |
| C | 17.596953 | 11.375814 | 12.934877 | H | 10.955393 | 6.897015  | 13.436771 |
| C | 14.813757 | 12.651870 | 13.249937 | H | 12.219783 | 7.974102  | 12.821417 |
| H | 8.436379  | 12.641746 | 16.777686 | H | 10.611351 | 13.901163 | 13.765050 |
| H | 8.150937  | 12.343925 | 14.045871 | H | 11.932986 | 15.127607 | 11.286236 |
| H | 11.822548 | 10.316037 | 20.504846 | H | 12.798097 | 14.472405 | 12.689133 |
| H | 12.984597 | 12.445492 | 20.937762 | H | 11.733500 | 15.880823 | 12.871925 |
| H | 12.881336 | 14.286462 | 19.293926 | H | 9.367229  | 14.823928 | 11.121329 |
| H | 10.260967 | 9.469305  | 17.235131 | H | 9.223376  | 15.647069 | 12.687842 |
| H | 8.334179  | 10.601369 | 18.354723 | H | 8.477682  | 14.054324 | 12.444398 |
| H | 8.828813  | 9.911956  | 19.911966 | H | 14.533968 | 10.295906 | 18.683723 |
| H | 8.274243  | 8.845220  | 18.604073 | H | 16.094141 | 10.395729 | 19.519801 |
| H | 12.000037 | 8.285484  | 18.586587 | H | 15.636218 | 8.908399  | 18.665057 |

|             |           |           |           |    |           |           |           |
|-------------|-----------|-----------|-----------|----|-----------|-----------|-----------|
| H           | 18.750550 | 10.665805 | 16.193319 | C  | 12.737759 | 12.999038 | 10.345340 |
| H           | 18.419477 | 9.197816  | 17.125888 | C  | 11.498306 | 12.386185 | 10.509548 |
| H           | 18.723408 | 10.729403 | 17.967819 | N  | 11.089515 | 12.594349 | 14.191263 |
| H           | 16.650263 | 13.056953 | 16.232227 | C  | 11.486074 | 11.695735 | 15.162061 |
| H           | 16.715248 | 12.972247 | 18.004448 | N  | 10.563997 | 11.835214 | 16.206196 |
| H           | 15.156885 | 12.855550 | 17.165608 | C  | 9.649872  | 12.845299 | 15.891259 |
| H           | 13.965498 | 6.529700  | 14.222598 | C  | 9.959003  | 13.292909 | 14.650077 |
| H           | 15.334377 | 5.552826  | 13.654279 | C  | 10.859730 | 11.013943 | 17.339593 |
| H           | 14.873224 | 7.031062  | 12.787078 | Si | 12.499433 | 10.221881 | 16.826498 |
| H           | 15.228732 | 6.694479  | 17.053411 | Si | 13.321045 | 8.047485  | 16.892347 |
| H           | 16.928634 | 7.154223  | 17.248496 | Si | 14.655463 | 7.491560  | 18.761912 |
| H           | 16.511456 | 5.636395  | 16.431721 | C  | 13.774632 | 7.683137  | 20.419527 |
| H           | 17.849857 | 7.915279  | 13.087436 | N  | 12.508467 | 10.888411 | 15.211417 |
| H           | 18.232689 | 6.480701  | 14.056329 | C  | 13.698669 | 13.809235 | 13.968524 |
| H           | 18.595087 | 8.102003  | 14.682793 | C  | 13.141444 | 15.160548 | 14.462846 |
| H           | 14.034440 | 9.841132  | 11.798554 | C  | 9.651713  | 11.435226 | 11.989271 |
| H           | 15.627969 | 9.094558  | 11.563455 | C  | 9.993807  | 9.978336  | 12.370519 |
| H           | 15.242651 | 10.635980 | 10.774547 | C  | 9.869724  | 10.641137 | 18.311309 |
| H           | 18.185869 | 10.453515 | 12.882742 | C  | 8.384854  | 10.668752 | 17.943246 |
| H           | 17.995165 | 11.978741 | 13.759800 | C  | 7.720787  | 9.295298  | 18.159944 |
| H           | 17.755379 | 11.934404 | 12.002337 | C  | 10.265720 | 10.241060 | 19.566397 |
| H           | 14.910718 | 13.184891 | 12.295132 | C  | 11.547143 | 10.508023 | 20.131261 |
| H           | 15.182146 | 13.306859 | 14.046640 | C  | 12.528884 | 11.244209 | 19.512531 |
| H           | 13.753137 | 12.454015 | 13.436763 | C  | 12.614682 | 11.570950 | 18.119907 |
| <b>Ts_3</b> |           |           |           | C  | 13.139698 | 12.946662 | 17.719585 |
| C           | 10.943081 | 12.217025 | 11.782984 | C  | 12.551242 | 14.084660 | 18.567275 |
| C           | 11.670828 | 12.714540 | 12.881540 | C  | 15.215189 | 13.903203 | 13.748013 |
| C           | 12.936085 | 13.315796 | 12.746897 | C  | 8.702058  | 11.473511 | 10.783581 |
| C           | 13.453409 | 13.445712 | 11.453428 | Si | 11.412649 | 6.683745  | 16.633837 |

|    |           |           |           |   |           |           |           |
|----|-----------|-----------|-----------|---|-----------|-----------|-----------|
| C  | 10.214646 | 7.505436  | 15.422313 | H | 11.456620 | 14.055767 | 18.539732 |
| Si | 14.643960 | 8.076449  | 14.917584 | H | 10.964014 | 12.021723 | 9.637702  |
| C  | 13.550339 | 8.049481  | 13.378707 | H | 13.153828 | 13.119057 | 9.348432  |
| C  | 10.560192 | 6.470339  | 18.307674 | H | 14.426256 | 13.904349 | 11.309222 |
| C  | 11.899852 | 4.982774  | 15.958859 | H | 9.117375  | 11.875714 | 12.838562 |
| C  | 7.623122  | 11.757570 | 18.724918 | H | 9.116582  | 10.936757 | 9.922573  |
| C  | 14.679944 | 12.949207 | 17.731298 | H | 8.485269  | 12.501651 | 10.474329 |
| C  | 15.773589 | 6.554036  | 14.886971 | H | 7.756462  | 10.987040 | 11.046235 |
| C  | 15.719382 | 9.631167  | 14.861729 | H | 10.513676 | 9.481040  | 11.543471 |
| C  | 15.163396 | 5.673367  | 18.597084 | H | 9.080176  | 9.415816  | 12.594284 |
| C  | 16.199366 | 8.585487  | 18.762488 | H | 10.644676 | 9.941594  | 13.248040 |
| H  | 8.876567  | 13.164977 | 16.568423 | H | 13.541736 | 13.062486 | 14.754036 |
| H  | 9.498255  | 14.057071 | 14.045188 | H | 15.479363 | 14.699458 | 13.042247 |
| H  | 9.511137  | 9.841891  | 20.240406 | H | 15.622216 | 12.958514 | 13.373185 |
| H  | 11.675112 | 10.277139 | 21.186829 | H | 15.706830 | 14.131685 | 14.699644 |
| H  | 13.290866 | 11.696565 | 20.151452 | H | 13.272258 | 15.932993 | 13.696119 |
| H  | 8.302964  | 10.891522 | 16.873193 | H | 13.672984 | 15.481304 | 15.366200 |
| H  | 8.086073  | 12.742994 | 18.602341 | H | 12.076494 | 15.091554 | 14.704054 |
| H  | 7.630150  | 11.526438 | 19.795774 | H | 13.510786 | 8.727239  | 20.607680 |
| H  | 6.579989  | 11.820581 | 18.392291 | H | 14.436631 | 7.337794  | 21.225055 |
| H  | 8.226596  | 8.517876  | 17.581004 | H | 12.852763 | 7.093579  | 20.459667 |
| H  | 6.670559  | 9.332714  | 17.848006 | H | 15.681802 | 5.466598  | 17.655683 |
| H  | 7.746303  | 9.002878  | 19.215025 | H | 14.286118 | 5.017615  | 18.649266 |
| H  | 12.829833 | 13.120896 | 16.682262 | H | 15.834016 | 5.399568  | 19.422173 |
| H  | 15.072953 | 12.176156 | 17.062167 | H | 16.802476 | 8.430083  | 17.861271 |
| H  | 15.063829 | 12.757309 | 18.740171 | H | 16.828093 | 8.360575  | 19.633695 |
| H  | 15.066961 | 13.919784 | 17.400526 | H | 15.924607 | 9.645768  | 18.805888 |
| H  | 12.881440 | 15.058198 | 18.186551 | H | 9.949982  | 8.516975  | 15.750874 |
| H  | 12.863542 | 14.005588 | 19.614339 | H | 9.289742  | 6.919300  | 15.343672 |

|             |           |           |           |    |           |           |           |
|-------------|-----------|-----------|-----------|----|-----------|-----------|-----------|
| H           | 10.653235 | 7.587266  | 14.422895 | Si | -0.190605 | 0.493551  | 0.748685  |
| H           | 10.357766 | 7.444102  | 18.767621 | Si | 1.171908  | -0.285014 | 2.450953  |
| H           | 11.184913 | 5.891374  | 18.997721 | Si | 1.275560  | 1.044998  | 4.401272  |
| H           | 9.605946  | 5.939870  | 18.191231 | C  | -0.381382 | 1.257282  | 5.280964  |
| H           | 12.362551 | 5.064925  | 14.968666 | N  | 0.409004  | 0.142141  | -0.844582 |
| H           | 11.013233 | 4.342184  | 15.864134 | C  | 0.870948  | 2.326527  | -3.460407 |
| H           | 12.612100 | 4.477309  | 16.620832 | C  | -0.307910 | 3.037739  | -4.156852 |
| H           | 12.900776 | 8.930401  | 13.372852 | C  | -0.097519 | -2.634297 | -4.040685 |
| H           | 12.927036 | 7.149420  | 13.331172 | C  | 0.472199  | -3.165483 | -2.706743 |
| H           | 14.176271 | 8.074636  | 12.476612 | C  | -3.266029 | -0.187694 | 0.944348  |
| H           | 15.206018 | 5.622076  | 14.989284 | C  | -4.001828 | -1.385462 | 0.352095  |
| H           | 16.517951 | 6.587094  | 15.690991 | C  | -4.004104 | -2.588767 | 1.315269  |
| H           | 16.315856 | 6.516207  | 13.932769 | C  | -3.633136 | 0.336992  | 2.141821  |
| H           | 16.377858 | 9.598909  | 13.983281 | C  | -2.988377 | 1.509377  | 2.690756  |
| H           | 16.349720 | 9.732799  | 15.752219 | C  | -2.056657 | 2.212394  | 2.004363  |
| H           | 15.080244 | 10.517006 | 14.780428 | C  | -1.531346 | 1.826150  | 0.680072  |
| <b>B'''</b> |           |           |           | C  | -1.483438 | 2.942679  | -0.376309 |
| C           | 0.683911  | -1.396632 | -4.462206 | C  | -2.867589 | 3.576265  | -0.589157 |
| C           | 0.407096  | -0.142156 | -3.887231 | C  | 2.077911  | 3.269421  | -3.357296 |
| C           | 1.190047  | 1.000909  | -4.137160 | C  | -0.123392 | -3.743555 | -5.101994 |
| C           | 2.259041  | 0.865936  | -5.029767 | Si | 0.428873  | -2.492963 | 2.826335  |
| C           | 2.531607  | -0.354329 | -5.643828 | C  | -0.042683 | -3.279306 | 1.172023  |
| C           | 1.756335  | -1.475253 | -5.357943 | Si | 3.246358  | -0.236759 | 1.287431  |
| N           | -0.718003 | -0.030267 | -3.000720 | C  | 3.334361  | -1.632908 | 0.018292  |
| C           | -0.634259 | 0.074925  | -1.625157 | C  | -1.085565 | -2.455476 | 3.960416  |
| N           | -1.947558 | 0.138843  | -1.168089 | C  | 1.788034  | -3.535936 | 3.633557  |
| C           | -2.823255 | 0.094343  | -2.255838 | C  | -5.449004 | -1.019671 | -0.035728 |
| C           | -2.070021 | -0.030940 | -3.376296 | C  | -0.417123 | 3.991132  | -0.030095 |
| C           | -2.098035 | 0.381866  | 0.253584  | C  | 4.674269  | -0.440429 | 2.518828  |

|   |           |           |           |   |           |           |           |
|---|-----------|-----------|-----------|---|-----------|-----------|-----------|
| C | 3.446537  | 1.413977  | 0.386870  | H | 1.506419  | -3.501563 | -2.843854 |
| C | 2.448404  | 0.190176  | 5.618902  | H | -0.122438 | -4.012490 | -2.345477 |
| C | 1.955585  | 2.753420  | 3.954832  | H | 0.470791  | -2.387744 | -1.937787 |
| H | -3.892080 | 0.160728  | -2.145286 | H | 0.570658  | 2.089331  | -2.433922 |
| H | -2.358725 | -0.108690 | -4.411942 | H | 2.388145  | 3.647841  | -4.338356 |
| H | -4.444554 | -0.115575 | 2.705461  | H | 2.934616  | 2.772162  | -2.891505 |
| H | -3.311355 | 1.863882  | 3.666508  | H | 1.809454  | 4.134467  | -2.741329 |
| H | -1.678859 | 3.145644  | 2.418717  | H | -0.045868 | 3.292775  | -5.190063 |
| H | -3.471976 | -1.700327 | -0.553168 | H | -0.556287 | 3.964563  | -3.627321 |
| H | -5.485100 | -0.151875 | -0.702596 | H | -1.202651 | 2.408227  | -4.173537 |
| H | -6.028248 | -0.765619 | 0.859572  | H | -1.089572 | 1.820650  | 4.668127  |
| H | -5.941598 | -1.861550 | -0.536437 | H | -0.225375 | 1.801322  | 6.222072  |
| H | -2.986618 | -2.880924 | 1.583493  | H | -0.839824 | 0.291534  | 5.518672  |
| H | -4.498462 | -3.447344 | 0.845195  | H | 3.441988  | 0.017521  | 5.192949  |
| H | -4.544130 | -2.352526 | 2.238838  | H | 2.044138  | -0.778620 | 5.933845  |
| H | -1.182775 | 2.483131  | -1.324356 | H | 2.565870  | 0.810258  | 6.517088  |
| H | 0.562724  | 3.515182  | 0.085774  | H | 2.972305  | 2.687417  | 3.550633  |
| H | -0.655822 | 4.516708  | 0.902512  | H | 1.986516  | 3.397312  | 4.842918  |
| H | -0.343281 | 4.743435  | -0.823743 | H | 1.325657  | 3.242198  | 3.201804  |
| H | -2.836065 | 4.318238  | -1.396485 | H | -0.759755 | -2.656094 | 0.625675  |
| H | -3.211588 | 4.075227  | 0.323588  | H | -0.496990 | -4.265993 | 1.331763  |
| H | -3.606995 | 2.813296  | -0.853229 | H | 0.834354  | -3.406876 | 0.529760  |
| H | 1.997494  | -2.424000 | -5.826432 | H | -1.846330 | -1.764402 | 3.580577  |
| H | 3.361069  | -0.434531 | -6.341060 | H | -0.810827 | -2.133980 | 4.971849  |
| H | 2.886169  | 1.723637  | -5.249510 | H | -1.535550 | -3.454030 | 4.035337  |
| H | -1.135368 | -2.333808 | -3.855438 | H | 2.671318  | -3.599405 | 2.988233  |
| H | 0.869623  | -4.180952 | -5.255585 | H | 1.429293  | -4.557549 | 3.815247  |
| H | -0.486254 | -3.370865 | -6.065883 | H | 2.103632  | -3.113413 | 4.594079  |
| H | -0.786974 | -4.550574 | -4.773188 | H | 2.517705  | -1.525691 | -0.702607 |

|          |           |           |           |   |           |           |           |
|----------|-----------|-----------|-----------|---|-----------|-----------|-----------|
| H        | 3.265975  | -2.620923 | 0.486944  | C | 13.390899 | 14.409408 | 16.483662 |
| H        | 4.288120  | -1.581903 | -0.524560 | C | 14.735079 | 15.087026 | 16.809042 |
| H        | 4.564448  | -1.349697 | 3.120336  | C | 12.283944 | 15.459129 | 16.260622 |
| H        | 4.743470  | 0.413030  | 3.203324  | C | 10.269099 | 10.651462 | 13.095214 |
| H        | 5.625228  | -0.508832 | 1.974270  | C | 10.250655 | 9.373821  | 12.501021 |
| H        | 4.437475  | 1.467616  | -0.082968 | C | 10.524477 | 9.289103  | 11.131082 |
| H        | 3.345729  | 2.268586  | 1.065248  | C | 10.831411 | 10.425104 | 10.387818 |
| H        | 2.687259  | 1.500581  | -0.397967 | C | 10.867605 | 11.671605 | 11.005477 |
| <b>B</b> |           |           |           | C | 10.582631 | 11.814186 | 12.368023 |
| Si       | 12.567129 | 11.636265 | 17.127182 | C | 9.946945  | 8.109688  | 13.292692 |
| Si       | 14.210041 | 10.019461 | 17.637173 | C | 8.561426  | 7.542203  | 12.924348 |
| Si       | 15.696844 | 10.511589 | 19.410755 | C | 11.034364 | 7.037371  | 13.092589 |
| Si       | 13.095166 | 7.971916  | 18.011372 | C | 10.596968 | 13.197872 | 12.999544 |
| Si       | 15.365659 | 9.898603  | 15.567665 | C | 11.974149 | 13.864207 | 12.832905 |
| N        | 12.079315 | 11.404251 | 15.455272 | C | 9.471621  | 14.078086 | 12.421265 |
| N        | 9.936687  | 10.769734 | 14.486749 | C | 14.841769 | 10.636705 | 21.092845 |
| N        | 10.061640 | 11.033460 | 16.698922 | C | 16.982063 | 9.126834  | 19.571766 |
| C        | 10.827219 | 11.083766 | 15.498733 | C | 16.587538 | 12.144391 | 19.062833 |
| C        | 8.732269  | 10.715323 | 16.379041 | C | 11.625763 | 7.781737  | 16.835323 |
| C        | 8.665864  | 10.551391 | 15.038417 | C | 12.456207 | 7.890621  | 19.791702 |
| C        | 10.821406 | 11.392005 | 17.828773 | C | 14.271792 | 6.513769  | 17.724041 |
| C        | 10.400868 | 11.559485 | 19.120595 | C | 14.338304 | 8.955317  | 14.291932 |
| C        | 11.310251 | 12.105190 | 20.102284 | C | 17.036068 | 9.021929  | 15.759041 |
| C        | 12.322452 | 13.026187 | 19.984237 | C | 15.678289 | 11.634120 | 14.881066 |
| C        | 12.827983 | 13.776492 | 18.855126 | H | 7.956000  | 10.606784 | 17.115015 |
| C        | 12.966762 | 13.406067 | 17.552672 | H | 7.828696  | 10.293822 | 14.411078 |
| C        | 8.990008  | 11.175705 | 19.582092 | H | 11.084212 | 11.834931 | 21.132460 |
| C        | 8.539735  | 11.833875 | 20.897094 | H | 12.739992 | 13.350177 | 20.938369 |
| C        | 8.837191  | 9.643294  | 19.670942 | H | 13.162891 | 14.780571 | 19.136497 |

|   |           |           |           |   |           |           |           |
|---|-----------|-----------|-----------|---|-----------|-----------|-----------|
| H | 8.301859  | 11.545538 | 18.811764 | H | 9.468765  | 15.057992 | 12.911851 |
| H | 8.692511  | 12.917919 | 20.874604 | H | 8.491272  | 13.613607 | 12.573729 |
| H | 9.078719  | 11.430024 | 21.761211 | H | 14.030205 | 11.369001 | 21.081850 |
| H | 7.473273  | 11.638889 | 21.056283 | H | 15.574967 | 10.940776 | 21.851900 |
| H | 9.131362  | 9.153689  | 18.736962 | H | 14.421146 | 9.672806  | 21.398578 |
| H | 7.799651  | 9.368482  | 19.894993 | H | 17.562939 | 8.982639  | 18.655806 |
| H | 9.474914  | 9.246684  | 20.468550 | H | 16.501527 | 8.173042  | 19.819251 |
| H | 13.512965 | 13.861995 | 15.542372 | H | 17.681312 | 9.367495  | 20.383474 |
| H | 15.526940 | 14.344270 | 16.942568 | H | 17.139267 | 12.107724 | 18.116643 |
| H | 14.668652 | 15.681344 | 17.727270 | H | 17.303258 | 12.369168 | 19.864427 |
| H | 15.026651 | 15.758607 | 15.993499 | H | 15.870141 | 12.970203 | 19.003303 |
| H | 12.564686 | 16.154550 | 15.460888 | H | 10.850497 | 8.523919  | 17.049620 |
| H | 12.113432 | 16.037864 | 17.176113 | H | 11.178396 | 6.784324  | 16.938922 |
| H | 11.340941 | 14.975719 | 15.984481 | H | 11.933230 | 7.909965  | 15.793871 |
| H | 10.508115 | 8.318002  | 10.643607 | H | 11.912647 | 8.804896  | 20.053898 |
| H | 11.047680 | 10.337993 | 9.326278  | H | 13.280500 | 7.770931  | 20.503859 |
| H | 11.111838 | 12.553221 | 10.418463 | H | 11.774688 | 7.039431  | 19.917670 |
| H | 9.933502  | 8.369193  | 14.355077 | H | 14.610671 | 6.475728  | 16.682561 |
| H | 8.532694  | 7.252022  | 11.867806 | H | 13.762798 | 5.566634  | 17.946890 |
| H | 7.768087  | 8.277703  | 13.092544 | H | 15.159894 | 6.578197  | 18.362396 |
| H | 8.340203  | 6.654663  | 13.528144 | H | 13.373654 | 9.456122  | 14.155286 |
| H | 11.038074 | 6.661722  | 12.063481 | H | 14.159930 | 7.918140  | 14.597264 |
| H | 10.848121 | 6.188250  | 13.759168 | H | 14.859583 | 8.936815  | 13.325386 |
| H | 12.028197 | 7.437171  | 13.312228 | H | 16.928899 | 8.036863  | 16.227875 |
| H | 10.416030 | 13.089146 | 14.071781 | H | 17.732580 | 9.610299  | 16.367104 |
| H | 12.218749 | 14.013454 | 11.775040 | H | 17.493295 | 8.878040  | 14.771119 |
| H | 12.748304 | 13.240837 | 13.288845 | H | 16.279506 | 11.577306 | 13.963988 |
| H | 11.980960 | 14.843637 | 13.321364 | H | 16.208684 | 12.274243 | 15.594464 |
| H | 9.607937  | 14.237205 | 11.345354 | H | 14.723736 | 12.109998 | 14.631176 |



**CO<sub>2</sub>**

C -0.000001 -0.000001 -0.006571  
O 0.000001 0.000001 1.162265  
O 0.000001 0.000001 -1.175695

**Ts'\_5**

C -0.297418 0.528633 1.429890  
C -0.658101 0.202795 2.750053  
C 0.251094 0.232002 3.823264  
C 1.572315 0.589350 3.532285  
C 1.959163 0.916199 2.234061  
C 1.033216 0.893423 1.195659  
N -2.028173 -0.160549 2.995691  
C -2.521594 -1.458496 2.894862  
N -3.899899 -1.307073 2.885277  
C -4.237122 0.046072 2.980693  
C -3.088706 0.751230 3.038774  
C -4.862065 -2.364672 2.707870  
C -5.501579 -2.891996 3.841723  
C -6.496411 -3.855191 3.632022  
C -6.823502 -4.276327 2.347625  
C -6.152864 -3.754919 1.243295  
C -5.153550 -2.789823 1.397072  
C -5.152522 -2.422583 5.246379  
C -5.133681 -3.574906 6.265123  
C -4.411454 -2.216923 0.195158  
C -4.375504 -3.173146 -1.006880  
N -1.852870 -2.568070 2.786176  
Si -0.743934 -3.374221 3.763680  
Si 0.059607 -5.259060 2.541546

Si 0.679558 -4.502513 0.404046  
C 1.647418 -2.882990 0.563617  
C -0.205413 -0.051177 5.247294  
C 0.898790 -0.635463 6.138526  
C -1.309767 0.518435 0.292615  
C -0.829363 -0.307163 -0.912416  
C -0.797822 1.225741 5.881673  
C -1.665790 1.957177 -0.131621  
O -1.870328 -4.178968 5.247255  
C -1.553518 -4.207143 6.438738  
O -0.768111 -3.724255 7.201732  
C -5.003749 -0.860082 -0.241150  
C -6.124462 -1.316622 5.709899  
Si 1.928636 -6.094586 3.711108  
C 2.378124 -7.828362 3.090344  
Si -1.692593 -6.840756 2.462603  
C -1.355264 -8.123866 1.107148  
C 3.420322 -4.956608 3.441064  
C 1.581235 -6.180331 5.568794  
C -1.834021 -7.739482 4.122834  
C -3.329900 -5.974923 2.100420  
C 1.763902 -5.768938 -0.498325  
C -0.884182 -4.200063 -0.614318  
H -5.264826 0.367196 2.986379  
H -2.913645 1.811803 3.094221  
H -7.014045 -4.284676 4.484448  
H -7.595701 -5.027596 2.204588  
H -6.404003 -4.113781 0.250495  
H -4.144926 -1.993857 5.210543

|   |           |           |           |   |           |           |           |
|---|-----------|-----------|-----------|---|-----------|-----------|-----------|
| H | -7.149661 | -1.703212 | 5.745219  | H | 0.063960  | 0.130806  | -1.370313 |
| H | -6.110596 | -0.455919 | 5.034915  | H | -4.149510 | -6.702935 | 2.037986  |
| H | -5.852872 | -0.969521 | 6.713227  | H | -3.290806 | -5.427786 | 1.153501  |
| H | -6.142920 | -3.955705 | 6.458365  | H | -3.576478 | -5.248242 | 2.880883  |
| H | -4.728457 | -3.218668 | 7.218159  | H | -2.147856 | -8.884295 | 1.094305  |
| H | -4.510331 | -4.402172 | 5.916457  | H | -0.398754 | -8.633679 | 1.269965  |
| H | -3.374548 | -2.050034 | 0.510990  | H | -1.321603 | -7.655710 | 0.116622  |
| H | -6.049951 | -0.982870 | -0.543737 | H | -2.028124 | -7.031207 | 4.935424  |
| H | -4.443840 | -0.463445 | -1.096190 | H | -0.918969 | -8.292003 | 4.364857  |
| H | -4.966111 | -0.119744 | 0.561220  | H | -2.663138 | -8.459127 | 4.091909  |
| H | -5.364101 | -3.273360 | -1.469431 | H | -1.560975 | -3.533580 | -0.070159 |
| H | -4.025113 | -4.169013 | -0.722132 | H | -1.420252 | -5.136934 | -0.804257 |
| H | -3.693820 | -2.778451 | -1.767425 | H | -0.650551 | -3.742741 | -1.584574 |
| H | 2.308478  | 0.612349  | 4.329367  | H | 1.072066  | -2.125959 | 1.107413  |
| H | 2.991760  | 1.188171  | 2.031651  | H | 1.890709  | -2.475731 | -0.426560 |
| H | 1.348997  | 1.148894  | 0.188014  | H | 2.587604  | -3.035864 | 1.105082  |
| H | -1.006503 | -0.798856 | 5.191210  | H | 1.249081  | -6.730936 | -0.604227 |
| H | -1.640466 | 1.609296  | 5.297184  | H | 2.700862  | -5.948380 | 0.041819  |
| H | -0.036840 | 2.012524  | 5.941784  | H | 2.019676  | -5.408322 | -1.503659 |
| H | -1.153780 | 1.012185  | 6.895555  | H | 1.369305  | -5.186275 | 5.978502  |
| H | 0.469491  | -0.951081 | 7.094275  | H | 2.452352  | -6.587632 | 6.098985  |
| H | 1.682939  | 0.101619  | 6.347507  | H | 0.720695  | -6.820949 | 5.791017  |
| H | 1.351170  | -1.515876 | 5.672707  | H | 1.566718  | -8.540927 | 3.279977  |
| H | -2.227766 | 0.051453  | 0.659327  | H | 3.277032  | -8.198989 | 3.600370  |
| H | -2.428493 | 1.942283  | -0.918626 | H | 2.575952  | -7.827167 | 2.012193  |
| H | -0.782837 | 2.478029  | -0.519313 | H | 3.193954  | -3.928911 | 3.748758  |
| H | -2.056946 | 2.532940  | 0.713717  | H | 3.722409  | -4.933371 | 2.387812  |
| H | -1.614295 | -0.342806 | -1.676698 | H | 4.278715  | -5.305646 | 4.030064  |
| H | -0.593857 | -1.330626 | -0.614726 | H | -7.291118 | 2.102917  | 5.005318  |

C -5.110900 3.722392 4.732494  
H -5.766377 4.157941 5.493792  
H -4.477579 4.516409 4.325922  
H -4.459004 2.999285 5.239837  
C -5.907887 3.043050 3.644590  
C -5.557082 3.181339 2.295460  
C -6.261432 2.508564 1.294974  
C -7.336165 1.683813 1.628175  
C -7.705361 1.544957 2.968718  
C -6.999293 2.221577 3.964187  
H -4.716283 3.816840 2.025446  
H -5.963056 2.621519 0.256316  
H -7.878366 1.150138 0.853101  
H -8.540001 0.904156 3.239762

**Int'\_3**

C -0.411304 0.440979 1.357583  
C -0.750693 0.178364 2.693242  
C 0.239021 0.339610 3.670819  
C 1.533281 0.736690 3.327997  
C 1.860329 0.982665 1.994464  
C 0.880325 0.836700 1.008875  
C -2.134590 -0.305921 3.054472  
C 1.151613 -2.713758 2.270684  
N 1.910423 -3.742140 1.707712  
C 1.796250 -4.889517 2.467923  
N 0.963243 -4.539634 3.513016  
C 0.571127 -3.203942 3.388572  
C 0.745767 -5.372129 4.664805

C 1.535480 -5.134561 5.801925  
C 1.313459 -5.946431 6.920751  
C 0.360522 -6.958960 6.887938  
C -0.392757 -7.183223 5.736252  
C -0.219634 -6.392350 4.596064  
C 2.616324 -4.062487 5.828253  
C 2.321674 -2.991978 6.895451  
C -1.055206 -6.593220 3.340323  
C -2.270190 -5.640672 3.346147  
N 2.388098 -6.039263 2.284477  
Si 2.002335 -7.333495 1.303877  
O 0.749582 -7.432388 0.389380  
C 2.746259 -3.618121 0.542006  
C 2.157079 -3.749656 -0.725498  
C 2.986694 -3.563049 -1.838986  
C 4.338189 -3.274287 -1.683515  
C 4.899705 -3.182520 -0.411044  
C 4.117497 -3.358369 0.733373  
C 0.674198 -4.048789 -0.891396  
C -0.104809 -2.746022 -1.167611  
C 4.714662 -3.269497 2.132704  
C 4.485724 -1.875334 2.753374  
C 0.401210 -5.096171 -1.983363  
C 6.209441 -3.620586 2.177257  
Si 3.570831 -9.040552 1.470398  
Si 4.942445 -8.689226 -0.421663  
C 5.310147 -6.845242 -0.609484  
Si 4.693869 -8.715002 3.517261  
C 5.796876 -7.186800 3.380864

|    |           |            |           |   |           |            |           |
|----|-----------|------------|-----------|---|-----------|------------|-----------|
| Si | 2.391654  | -11.079864 | 1.340819  | H | -1.121836 | -7.987488  | 5.725259  |
| C  | 1.090726  | -10.990272 | -0.023179 | H | 0.208853  | -7.587209  | 7.761689  |
| C  | 3.432529  | -8.452928  | 4.898656  | H | 1.907142  | -5.794773  | 7.818299  |
| C  | 5.767241  | -10.224414 | 3.919500  | H | -0.435786 | -6.333135  | 2.475486  |
| C  | -1.504947 | -8.046417  | 3.134987  | H | -1.953623 | -4.594460  | 3.415767  |
| C  | 4.011063  | -4.684587  | 6.027443  | H | -2.926644 | -5.857839  | 4.196619  |
| C  | 3.605154  | -12.491690 | 0.987045  | H | -2.847568 | -5.761659  | 2.423008  |
| C  | 1.540722  | -11.427285 | 2.996950  | H | -1.949276 | -8.151207  | 2.140995  |
| C  | 6.572612  | -9.634918  | -0.230640 | H | -2.251494 | -8.354229  | 3.876437  |
| C  | 4.052591  | -9.288892  | -1.979048 | H | -0.654696 | -8.732989  | 3.193327  |
| H  | 1.109566  | -1.735719  | 1.822122  | H | 2.622996  | -3.558476  | 4.857477  |
| H  | -0.073522 | -2.737937  | 4.114319  | H | 3.089212  | -2.210136  | 6.869546  |
| H  | 2.568817  | -3.653940  | -2.837067 | H | 2.314351  | -3.426795  | 7.901195  |
| H  | 4.966004  | -3.137702  | -2.560021 | H | 1.347042  | -2.522684  | 6.722037  |
| H  | 5.962489  | -2.986510  | -0.311402 | H | 4.780412  | -3.904630  | 5.988887  |
| H  | 0.311494  | -4.471716  | 0.050595  | H | 4.223146  | -5.417659  | 5.245349  |
| H  | 0.225488  | -2.292045  | -2.109459 | H | 4.086237  | -5.188480  | 6.997444  |
| H  | 0.043611  | -2.012561  | -0.369041 | H | 5.963019  | -6.668578  | -1.474405 |
| H  | -1.177665 | -2.955836  | -1.246231 | H | 5.807166  | -6.441096  | 0.278009  |
| H  | 0.693090  | -4.734839  | -2.976215 | H | 4.392381  | -6.266437  | -0.759472 |
| H  | -0.670470 | -5.320017  | -2.011927 | H | 7.195123  | -9.507538  | -1.125774 |
| H  | 0.928656  | -6.027150  | -1.761156 | H | 6.398336  | -10.707577 | -0.088126 |
| H  | 4.190099  | -4.005883  | 2.752700  | H | 7.144435  | -9.270985  | 0.631241  |
| H  | 4.990219  | -1.106228  | 2.157165  | H | 3.071877  | -8.809597  | -2.077585 |
| H  | 4.894624  | -1.844452  | 3.770084  | H | 3.897042  | -10.373601 | -1.961934 |
| H  | 3.424426  | -1.621578  | 2.807065  | H | 4.643651  | -9.046034  | -2.871771 |
| H  | 6.820105  | -2.845011  | 1.700972  | H | 5.194656  | -6.324919  | 3.076306  |
| H  | 6.414774  | -4.573325  | 1.681170  | H | 6.589476  | -7.329224  | 2.636800  |
| H  | 6.534750  | -3.703062  | 3.219448  | H | 6.273904  | -6.954680  | 4.341909  |

|              |           |            |           |    |          |           |           |
|--------------|-----------|------------|-----------|----|----------|-----------|-----------|
| H            | 2.780222  | -7.606003  | 4.664791  | C  | 6.982755 | 8.648936  | 10.083408 |
| H            | 3.938842  | -8.241430  | 5.849555  | N  | 5.559941 | 9.939848  | 6.901149  |
| H            | 2.800635  | -9.336194  | 5.041260  | C  | 5.244535 | 11.274120 | 6.721202  |
| H            | 6.497513  | -10.416828 | 3.125158  | N  | 4.967116 | 11.394636 | 5.369902  |
| H            | 5.156872  | -11.127256 | 4.039913  | C  | 5.125364 | 10.155449 | 4.741706  |
| H            | 6.318735  | -10.065317 | 4.855652  | C  | 5.489446 | 9.259887  | 5.684839  |
| H            | 0.475285  | -10.091590 | 0.096765  | C  | 4.430079 | 12.572740 | 4.732330  |
| H            | 0.443403  | -11.876685 | 0.004731  | C  | 3.055677 | 12.845919 | 4.895364  |
| H            | 1.557667  | -10.941088 | -1.013157 | C  | 2.544014 | 13.967164 | 4.235741  |
| H            | 4.103480  | -12.353839 | 0.020304  | C  | 3.364098 | 14.771559 | 3.447027  |
| H            | 3.076900  | -13.453676 | 0.958944  | C  | 4.716266 | 14.478384 | 3.310357  |
| H            | 4.381590  | -12.555198 | 1.758572  | C  | 5.284957 | 13.374568 | 3.957462  |
| H            | 0.854361  | -10.618731 | 3.271298  | C  | 2.154887 | 11.941450 | 5.730692  |
| H            | 2.271363  | -11.537402 | 3.806813  | C  | 0.900816 | 12.651694 | 6.263254  |
| H            | 0.960565  | -12.357481 | 2.938157  | C  | 6.763085 | 13.053421 | 3.794367  |
| H            | -1.164646 | 0.321906   | 0.582091  | C  | 7.643824 | 14.313912 | 3.773795  |
| H            | -2.907635 | 0.298889   | 2.568582  | N  | 5.177884 | 12.173313 | 7.666363  |
| H            | -2.298165 | -0.271745  | 4.135553  | Si | 5.740250 | 13.715474 | 7.895845  |
| H            | -2.278307 | -1.342895  | 2.724390  | Si | 4.972523 | 14.756857 | 9.821278  |
| H            | -0.003712 | 0.142523   | 4.713020  | Si | 3.848180 | 16.635080 | 8.916982  |
| H            | 2.287827  | 0.843910   | 4.102656  | C  | 2.805619 | 16.110404 | 7.429459  |
| H            | 2.869147  | 1.280104   | 1.723317  | C  | 3.203564 | 8.650831  | 7.961039  |
| H            | 1.124525  | 1.023764   | -0.033352 | C  | 2.086562 | 9.253129  | 8.830949  |
| <b>Ts'_6</b> |           |            |           | C  | 8.119538 | 10.010443 | 8.247344  |
| C            | 6.911378  | 9.314526   | 8.855993  | C  | 9.150055 | 10.460665 | 9.291878  |
| C            | 5.677161  | 9.291513   | 8.183259  | C  | 2.833704 | 7.237145  | 7.474109  |
| C            | 4.538442  | 8.644937   | 8.692277  | C  | 8.788746 | 9.107748  | 7.189007  |
| C            | 4.665881  | 7.984598   | 9.920273  | O  | 8.176424 | 13.364344 | 8.385617  |
| C            | 5.873830  | 7.986999   | 10.608540 | C  | 8.399158 | 14.144199 | 7.488449  |

|    |          |           |           |   |          |           |           |
|----|----------|-----------|-----------|---|----------|-----------|-----------|
| O  | 9.128690 | 14.779361 | 6.810829  | H | 2.593242 | 10.095892 | 4.614560  |
| O  | 6.576212 | 14.557525 | 6.844862  | H | 0.193494 | 12.877015 | 5.457032  |
| C  | 7.001201 | 12.220623 | 2.515883  | H | 1.151157 | 13.586437 | 6.771669  |
| C  | 1.731495 | 10.688215 | 4.933724  | H | 0.388112 | 12.000227 | 6.978136  |
| Si | 3.536850 | 13.260650 | 10.948277 | H | 7.914707 | 8.648691  | 10.638912 |
| C  | 1.965946 | 13.041671 | 9.918196  | H | 5.952884 | 7.477289  | 11.565155 |
| Si | 6.775779 | 15.446582 | 11.191885 | H | 3.804732 | 7.475334  | 10.344510 |
| C  | 8.143111 | 16.356009 | 10.258532 | H | 7.755508 | 10.910889 | 7.742398  |
| C  | 4.382874 | 11.590037 | 11.178549 | H | 8.089990 | 8.829938  | 6.395295  |
| C  | 3.057845 | 13.956910 | 12.644160 | H | 9.161336 | 8.186431  | 7.651929  |
| C  | 6.070067 | 16.635159 | 12.488987 | H | 9.636376 | 9.630021  | 6.731002  |
| C  | 7.524355 | 13.944788 | 12.063302 | H | 9.913110 | 11.078270 | 8.808991  |
| C  | 2.702869 | 17.397481 | 10.218778 | H | 9.654376 | 9.604975  | 9.755250  |
| C  | 5.109028 | 17.918062 | 8.340901  | H | 8.682863 | 11.059695 | 10.078944 |
| H  | 4.956244 | 10.038507 | 3.685578  | H | 3.301576 | 9.283885  | 7.075142  |
| H  | 5.706186 | 8.206562  | 5.617485  | H | 1.890768 | 7.262101  | 6.916420  |
| H  | 5.345841 | 15.123675 | 2.706013  | H | 2.710988 | 6.551209  | 8.320290  |
| H  | 2.945085 | 15.639737 | 2.945190  | H | 3.611543 | 6.833947  | 6.818251  |
| H  | 1.494742 | 14.220864 | 4.342898  | H | 1.153951 | 9.313205  | 8.258457  |
| H  | 7.064633 | 12.451439 | 4.658604  | H | 2.353705 | 10.259133 | 9.162456  |
| H  | 6.706926 | 12.794240 | 1.629298  | H | 1.896437 | 8.640331  | 9.719016  |
| H  | 6.428182 | 11.289091 | 2.520414  | H | 2.299988 | 16.982594 | 6.994225  |
| H  | 8.063416 | 11.967806 | 2.423009  | H | 2.038108 | 15.385265 | 7.717995  |
| H  | 7.490250 | 14.892382 | 2.855369  | H | 3.420714 | 15.655129 | 6.644844  |
| H  | 8.699132 | 14.022913 | 3.806521  | H | 2.203968 | 18.286437 | 9.811026  |
| H  | 7.432952 | 14.940121 | 4.641840  | H | 3.253579 | 17.700665 | 11.116291 |
| H  | 2.735845 | 11.613264 | 6.600924  | H | 1.925526 | 16.688208 | 10.527038 |
| H  | 1.165242 | 10.981797 | 4.042629  | H | 5.830549 | 17.460222 | 7.654432  |
| H  | 1.091356 | 10.048077 | 5.551431  | H | 5.661461 | 18.349028 | 9.183435  |

|   |          |           |           |    |          |           |           |
|---|----------|-----------|-----------|----|----------|-----------|-----------|
| H | 4.603506 | 18.738146 | 7.814304  | C  | 5.129683 | 6.359581  | 3.555080  |
| H | 2.214340 | 12.694320 | 8.910480  | H  | 8.201403 | 7.726620  | 3.097327  |
| H | 1.417022 | 13.985721 | 9.823661  | H  | 8.655822 | 6.425406  | 5.149602  |
| H | 1.293584 | 12.305791 | 10.377944 | H  | 6.847196 | 5.079791  | 6.203847  |
| H | 4.713233 | 11.190320 | 10.214806 | H  | 4.584772 | 5.041344  | 5.167882  |
| H | 3.692993 | 10.867321 | 11.633413 | C' |          |           |           |
| H | 5.262134 | 11.671125 | 11.826885 | C  | 5.225927 | 5.603068  | 4.943259  |
| H | 2.609121 | 14.953530 | 12.563053 | C  | 5.080060 | 6.389729  | 3.791114  |
| H | 3.930024 | 14.032836 | 13.303705 | C  | 6.221957 | 7.005416  | 3.262058  |
| H | 2.327992 | 13.296142 | 13.130440 | C  | 7.468526 | 6.858580  | 3.873790  |
| H | 8.745859 | 15.668871 | 9.658771  | C  | 7.595953 | 6.086998  | 5.029483  |
| H | 8.809048 | 16.839823 | 10.985551 | C  | 6.468766 | 5.455422  | 5.561218  |
| H | 7.749313 | 17.130312 | 9.593088  | C  | 3.720515 | 6.605080  | 3.171137  |
| H | 5.701069 | 17.555332 | 12.021068 | C  | 5.530904 | 9.140338  | 5.902705  |
| H | 6.853595 | 16.914651 | 13.205553 | N  | 5.571048 | 9.883575  | 7.083126  |
| H | 5.241889 | 16.188658 | 13.049847 | C  | 5.204733 | 11.196072 | 6.836564  |
| H | 7.877669 | 13.211983 | 11.330055 | N  | 4.927632 | 11.234531 | 5.479773  |
| H | 6.796062 | 13.451241 | 12.716475 | C  | 5.138468 | 9.972282  | 4.914294  |
| H | 8.378992 | 14.250465 | 12.681024 | C  | 5.709808 | 9.313775  | 8.398607  |
| H | 4.133670 | 6.348578  | 3.117750  | C  | 6.953031 | 9.384854  | 9.051159  |
| C | 5.868125 | 7.903154  | 1.686150  | C  | 7.041446 | 8.808804  | 10.322553 |
| H | 6.039564 | 7.279008  | 0.800075  | C  | 5.942062 | 8.180725  | 10.905321 |
| H | 6.527979 | 8.772550  | 1.607507  | C  | 4.727566 | 8.118913  | 10.230445 |
| H | 4.829743 | 8.248327  | 1.645000  | C  | 4.582078 | 8.693007  | 8.962259  |
| C | 6.138341 | 7.122465  | 2.950699  | C  | 8.159802 | 10.013919 | 8.371994  |
| C | 7.408747 | 7.129582  | 3.542625  | C  | 8.857215 | 8.978705  | 7.463611  |
| C | 7.666527 | 6.396647  | 4.701847  | C  | 3.246215 | 8.625460  | 8.235588  |
| C | 6.652387 | 5.641750  | 5.294941  | C  | 2.916066 | 7.175832  | 7.832827  |
| C | 5.382284 | 5.623487  | 4.714186  | N  | 5.084776 | 12.147459 | 7.716070  |

|    |          |           |           |   |          |           |           |
|----|----------|-----------|-----------|---|----------|-----------|-----------|
| Si | 5.895696 | 13.497570 | 8.202694  | C | 7.816321 | 14.212996 | 7.363297  |
| O  | 6.551704 | 14.552133 | 6.958940  | O | 8.861913 | 14.633040 | 6.937246  |
| C  | 4.383807 | 12.369582 | 4.776244  | O | 7.632477 | 13.299292 | 8.366100  |
| C  | 3.009305 | 12.648067 | 4.925568  | H | 4.984910 | 9.795653  | 3.864066  |
| C  | 2.492560 | 13.727994 | 4.204716  | H | 5.784976 | 8.093525  | 5.889746  |
| C  | 3.308000 | 14.490487 | 3.370552  | H | 5.286354 | 14.803053 | 2.602161  |
| C  | 4.660292 | 14.193068 | 3.246007  | H | 2.885074 | 15.328128 | 2.822311  |
| C  | 5.232584 | 13.126879 | 3.951554  | H | 1.442471 | 13.983403 | 4.299263  |
| C  | 2.115738 | 11.787055 | 5.812044  | H | 7.016287 | 12.213446 | 4.669050  |
| C  | 1.718351 | 10.478565 | 5.094443  | H | 6.645053 | 12.482228 | 1.637445  |
| C  | 6.710164 | 12.797378 | 3.793512  | H | 6.368339 | 11.000159 | 2.567567  |
| C  | 6.942669 | 11.930423 | 2.536566  | H | 8.004031 | 11.673891 | 2.446340  |
| C  | 0.847918 | 12.511538 | 6.289460  | H | 7.443725 | 14.598820 | 2.790575  |
| C  | 7.596447 | 14.053783 | 3.729059  | H | 8.650525 | 13.761655 | 3.773733  |
| Si | 4.947262 | 14.730471 | 9.920659  | H | 7.394062 | 14.725721 | 4.564616  |
| Si | 6.681656 | 15.413155 | 11.377104 | H | 2.696656 | 11.525835 | 6.704565  |
| C  | 7.237827 | 13.945460 | 12.433803 | H | 1.147741 | 10.703667 | 4.186301  |
| Si | 3.969231 | 16.575608 | 8.811401  | H | 1.090922 | 9.864730  | 5.750792  |
| C  | 5.312981 | 17.807152 | 8.313206  | H | 2.593230 | 9.886005  | 4.812440  |
| Si | 3.378538 | 13.343071 | 11.002489 | H | 0.143911 | 12.676254 | 5.465618  |
| C  | 2.802752 | 14.144371 | 12.619195 | H | 1.081256 | 13.479888 | 6.740630  |
| C  | 3.074383 | 15.992018 | 7.251780  | H | 0.338657 | 11.899433 | 7.040675  |
| C  | 2.729040 | 17.431325 | 9.959228  | H | 7.980804 | 8.850535  | 10.864428 |
| C  | 2.110944 | 9.247969  | 9.066089  | H | 6.033945 | 7.741259  | 11.894989 |
| C  | 9.162016 | 10.628718 | 9.358657  | H | 3.875912 | 7.631102  | 10.696983 |
| C  | 1.888266 | 13.111495 | 9.863582  | H | 7.794992 | 10.824935 | 7.734965  |
| C  | 4.158115 | 11.664848 | 11.377585 | H | 8.172033 | 8.578378  | 6.710233  |
| C  | 8.180956 | 16.091612 | 10.450841 | H | 9.235529 | 8.139542  | 8.059046  |
| C  | 6.002782 | 16.769733 | 12.512540 | H | 9.703468 | 9.442585  | 6.944549  |



|   |          |           |           |             |           |           |           |
|---|----------|-----------|-----------|-------------|-----------|-----------|-----------|
| H | 9.914758 | 11.199025 | 8.806262  | H           | 8.905266  | 16.487883 | 11.174988 |
| H | 9.682821 | 9.858785  | 9.939717  | H           | 7.912495  | 16.901488 | 9.764828  |
| H | 8.665655 | 11.315969 | 10.049262 | H           | 5.736382  | 17.666570 | 11.940586 |
| H | 3.329492 | 9.207464  | 7.313811  | H           | 6.759672  | 17.057476 | 13.253854 |
| H | 1.978664 | 7.142890  | 7.266257  | H           | 5.108346  | 16.439669 | 13.053150 |
| H | 2.802723 | 6.540146  | 8.718466  | H           | 7.566615  | 13.110288 | 11.804896 |
| H | 3.710415 | 6.753334  | 7.209683  | H           | 6.429356  | 13.585658 | 13.080262 |
| H | 1.177122 | 9.239674  | 8.492668  | H           | 8.078942  | 14.236975 | 13.076086 |
| H | 2.344891 | 10.282307 | 9.328018  | H           | 4.354015  | 5.106503  | 5.363113  |
| H | 1.940289 | 8.691186  | 9.994156  | H           | 3.108033  | 5.699824  | 3.227944  |
| H | 2.615786 | 16.845715 | 6.735426  | H           | 3.802846  | 6.904495  | 2.122083  |
| H | 2.281385 | 15.275814 | 7.489262  | H           | 3.179979  | 7.399356  | 3.702778  |
| H | 3.762952 | 15.506653 | 6.551335  | H           | 6.133154  | 7.613331  | 2.364086  |
| H | 2.308145 | 18.319777 | 9.470832  | H           | 8.338522  | 7.353472  | 3.450778  |
| H | 3.202785 | 17.752688 | 10.894082 | H           | 8.562761  | 5.978672  | 5.512039  |
| H | 1.898812 | 16.763383 | 10.216893 | H           | 6.556847  | 4.849781  | 6.459107  |
| H | 6.063193 | 17.324493 | 7.676969  | <b>Ts_5</b> |           |           |           |
| H | 5.822832 | 18.224345 | 9.188675  | C           | -2.460375 | 2.524866  | -1.585085 |
| H | 4.871805 | 18.640400 | 7.750526  | C           | -2.190514 | 2.547606  | -0.202244 |
| H | 2.211572 | 12.713526 | 8.897008  | C           | -3.191650 | 2.405513  | 0.773442  |
| H | 1.373569 | 14.061888 | 9.681678  | C           | -4.513509 | 2.283493  | 0.327369  |
| H | 1.162192 | 12.412502 | 10.298328 | C           | -4.813609 | 2.290671  | -1.030676 |
| H | 4.539797 | 11.198789 | 10.463265 | C           | -3.796647 | 2.399901  | -1.976121 |
| H | 3.419339 | 10.985547 | 11.822445 | N           | -0.830457 | 2.764403  | 0.223724  |
| H | 4.994183 | 11.759811 | 12.078852 | C           | 0.153726  | 1.789151  | 0.302910  |
| H | 2.382490 | 15.141950 | 12.446672 | N           | 1.312812  | 2.486540  | 0.635105  |
| H | 3.629801 | 14.247251 | 13.331202 | C           | 1.031846  | 3.850957  | 0.754734  |
| H | 2.027256 | 13.527672 | 13.092205 | C           | -0.285134 | 4.020222  | 0.510541  |
| H | 8.677088 | 15.307399 | 9.870516  | C           | 2.639107  | 1.929600  | 0.575307  |

|    |           |           |           |   |           |           |           |
|----|-----------|-----------|-----------|---|-----------|-----------|-----------|
| C  | 3.343972  | 2.049699  | -0.636846 | C | 2.752061  | 0.033979  | 3.891053  |
| C  | 4.640903  | 1.526162  | -0.684364 | C | 2.903115  | 1.925400  | -3.141489 |
| C  | 5.196777  | 0.897003  | 0.425280  | C | 0.024964  | -6.228676 | -0.237070 |
| C  | 4.472220  | 0.786363  | 1.610170  | C | 2.525496  | -4.720084 | 0.727881  |
| C  | 3.177245  | 1.306023  | 1.716253  | C | -2.656440 | -3.952502 | -2.548753 |
| C  | 2.745013  | 2.746856  | -1.850863 | C | -3.342366 | -3.623518 | 0.435446  |
| C  | 3.352073  | 4.153707  | -2.023813 | H | -0.895800 | 4.907502  | 0.509340  |
| C  | 2.403398  | 1.253390  | 3.026421  | H | 1.802359  | 4.561332  | 1.003873  |
| C  | 2.608875  | 2.559992  | 3.822409  |   |           |           |           |
| N  | 0.019069  | 0.518846  | 0.071639  | H | -5.314437 | 2.173253  | 1.051793  |
| Si | 0.222463  | -0.889734 | 0.971204  | H | -5.845549 | 2.192485  | -1.356831 |
| O  | -1.392964 | -0.958940 | 2.201047  | H | -4.046238 | 2.373938  | -3.031599 |
| C  | -1.345564 | -1.267981 | 3.393240  | H | -1.819008 | 2.093733  | 2.367103  |
| O  | -0.558544 | -1.425849 | 4.280386  | H | -4.042193 | 4.169992  | 2.755488  |
| C  | -2.865259 | 2.402477  | 2.259861  | H | -2.353937 | 4.537172  | 2.358158  |
| C  | -3.009165 | 3.817669  | 2.857868  | H | -2.753925 | 3.806687  | 3.923296  |
| C  | -1.341094 | 2.629592  | -2.614397 | H | -4.771377 | 1.742755  | 3.114453  |
| C  | -0.939235 | 4.097352  | -2.871373 | H | -3.350278 | 1.321190  | 4.074978  |
| C  | -3.730277 | 1.406788  | 3.051435  | H | -3.711676 | 0.413726  | 2.595661  |
| C  | -1.682734 | 1.951193  | -3.950456 | H | -0.472822 | 2.107548  | -2.195821 |
| Si | -0.087343 | -2.742914 | -0.497352 | H | -1.788930 | 4.658083  | -3.277247 |
| Si | -2.388038 | -2.869143 | -1.015259 | H | -0.120679 | 4.141276  | -3.599332 |
| C  | -3.069578 | -1.142893 | -1.354768 | H | -0.603599 | 4.593310  | -1.956867 |
| Si | 1.238609  | -2.348550 | -2.396268 | H | -2.447003 | 2.511965  | -4.500382 |
| C  | 0.406173  | -1.024233 | -3.458111 | H | -2.042010 | 0.928825  | -3.805984 |
| Si | 0.632496  | -4.670119 | 0.654151  | H | -0.787168 | 1.910303  | -4.578345 |
| C  | -0.023685 | -4.682190 | 2.428517  | H | 4.919966  | 0.288550  | 2.464152  |
| C  | 2.945733  | -1.737912 | -1.849779 | H | 6.200601  | 0.484821  | 0.366698  |
| C  | 1.461972  | -3.917688 | -3.435668 | H | 5.214946  | 1.600205  | -1.603428 |

H 1.338156 1.178064 2.775046  
H 2.293759 3.435005 3.245269  
H 3.665659 2.685961 4.084813  
H 2.024293 2.532756 4.748472  
H 2.059110 -0.025433 4.735788  
H 3.769850 0.100554 4.292859  
H 2.654508 -0.892957 3.317945  
H 1.672463 2.870847 -1.673987  
H 2.886197 4.666069 -2.872964  
H 4.429842 4.087376 -2.211327  
H 3.200249 4.764797 -1.128867  
H 2.371960 2.419661 -3.962575  
H 2.492455 0.921365 -3.020942  
H 3.954759 1.833053 -3.433683  
H -4.134087 -1.189056 -1.619106  
H -2.536258 -0.660737 -2.179591  
H -2.961903 -0.494019 -0.479919  
H -3.728702 -4.047106 -2.767425  
H -2.249697 -4.959695 -2.402867  
H -2.170823 -3.518795 -3.430677  
H -3.205646 -3.027340 1.344189  
H -3.016140 -4.647826 0.648328  
H -4.415846 -3.653221 0.205610  
H 0.217023 -0.127925 -2.858797  
H -0.556899 -1.376572 -3.844455  
H 1.031627 -0.743949 -4.315354  
H 2.868487 -0.839873 -1.226858  
H 3.570934 -1.492549 -2.718419  
H 3.468256 -2.502992 -1.265076

H 0.496237 -4.323401 -3.758540  
H 1.982723 -4.700046 -2.871203  
H 2.055829 -3.700944 -4.333954  
H 0.352242 -3.822449 2.994781  
H 0.298175 -5.595738 2.945871  
H -1.118424 -4.646089 2.458382  
H -1.070235 -6.275422 -0.251564  
H 0.393355 -7.131007 0.268777  
H 0.373840 -6.256681 -1.275860  
H 2.927356 -3.815778 1.199434  
H 2.965196 -4.801122 -0.272881  
H 2.861312 -5.585637 1.314140  
**Int\_3**  
C 5.496094 13.636768 8.073555  
C 5.052391 14.332761 9.211133  
C 4.347197 15.547821 9.144866  
C 4.076328 16.059441 7.871217  
C 4.492800 15.387279 6.723949  
C 5.194524 14.189704 6.823496  
N 5.371932 13.786948 10.503842  
C 6.460552 14.193531 11.249902  
N 6.483021 13.343511 12.339211  
C 5.418959 12.440958 12.263053  
C 4.733942 12.713416 11.128511  
C 7.495508 13.367073 13.364111  
C 7.220045 14.027480 14.573313  
C 8.207016 13.978234 15.566777  
C 9.410036 13.314977 15.350423  
C 9.667524 12.701266 14.125889

|    |           |           |           |   |           |           |           |
|----|-----------|-----------|-----------|---|-----------|-----------|-----------|
| C  | 8.719057  | 12.720602 | 13.099829 | H | 5.259813  | 11.695374 | 13.023911 |
| N  | 7.308319  | 15.140579 | 10.947138 | H | 3.858889  | 12.253628 | 10.699595 |
| Si | 7.410813  | 16.706484 | 11.520826 | H | 8.031696  | 14.473809 | 16.516743 |
| C  | 5.899365  | 14.742434 | 14.816987 | H | 10.163573 | 13.292776 | 16.133358 |
| C  | 6.080374  | 16.092685 | 15.530188 | H | 10.624871 | 12.216276 | 13.964350 |
| C  | 8.990307  | 12.073167 | 11.747974 | H | 5.450908  | 14.957684 | 13.841667 |
| C  | 10.481955 | 12.043052 | 11.381115 | H | 5.353721  | 13.602375 | 16.597506 |
| C  | 3.872846  | 16.253657 | 10.406927 | H | 4.757165  | 12.885505 | 15.090742 |
| C  | 3.831353  | 17.782472 | 10.267985 | H | 3.973377  | 14.333768 | 15.751781 |
| C  | 6.341896  | 12.375253 | 8.186014  | H | 6.473680  | 15.967253 | 16.546004 |
| C  | 7.830537  | 12.728994 | 7.996756  | H | 5.109153  | 16.592352 | 15.609359 |
| Si | 9.185695  | 17.895348 | 10.609692 | H | 6.742338  | 16.742729 | 14.954071 |
| Si | 8.405232  | 20.101324 | 10.293093 | H | 8.486354  | 12.685445 | 10.992572 |
| C  | 7.355184  | 20.182181 | 8.718703  | H | 8.871821  | 10.002566 | 12.424965 |
| O  | 6.432475  | 17.349799 | 12.542245 | H | 8.576892  | 10.216018 | 10.686195 |
| Si | 10.808456 | 17.764273 | 12.320991 | H | 7.320659  | 10.651563 | 11.857582 |
| C  | 10.269113 | 18.835776 | 13.782537 | H | 11.038003 | 11.334644 | 12.005401 |
| Si | 9.800361  | 16.810816 | 8.609599  | H | 10.940388 | 13.030042 | 11.488460 |
| C  | 11.000138 | 17.898729 | 7.625204  | H | 10.596097 | 11.725634 | 10.339377 |
| C  | 10.973346 | 15.976681 | 12.911688 | H | 3.538503  | 16.997161 | 7.774993  |
| C  | 12.487302 | 18.361344 | 11.679505 | H | 4.276472  | 15.806432 | 5.744942  |
| C  | 10.647068 | 15.169557 | 9.014053  | H | 5.528943  | 13.687180 | 5.920673  |
| C  | 8.254326  | 16.491255 | 7.571466  | H | 4.584943  | 16.035566 | 11.209916 |
| C  | 7.358769  | 20.645306 | 11.765357 | H | 2.534374  | 14.626135 | 11.013115 |
| C  | 9.881074  | 21.271256 | 10.086279 | H | 1.743149  | 15.903448 | 10.068207 |
| C  | 4.937417  | 13.832686 | 15.609758 | H | 2.174018  | 16.190033 | 11.769184 |
| C  | 8.399493  | 10.649871 | 11.677298 | H | 3.646729  | 18.229467 | 11.249102 |
| C  | 2.496201  | 15.706681 | 10.840240 | H | 3.037806  | 18.111895 | 9.587042  |
| C  | 5.901799  | 11.270638 | 7.211459  | H | 4.786984  | 18.170156 | 9.903034  |

H 6.227575 11.976529 9.199430  
H 6.494054 10.365324 7.384444  
H 6.051410 11.568036 6.167965  
H 4.843826 11.021915 7.346185  
H 8.457215 11.841631 8.142111  
H 8.138119 13.496728 8.711101  
H 8.010047 13.115961 6.987297  
H 11.700299 15.909023 13.731737  
H 11.312454 15.319642 12.104117  
H 10.019344 15.582437 13.278652  
H 13.236009 18.334111 12.482057  
H 12.430197 19.389125 11.303671  
H 12.846494 17.724514 10.862357  
H 9.259642 18.563209 14.110985  
H 10.261123 19.899986 13.521013  
H 10.954846 18.700955 14.629382  
H 10.020211 14.576286 9.686621  
H 11.614532 15.329982 9.504085  
H 10.822128 14.583998 8.102237  
H 7.517853 15.913257 8.139135  
H 8.507413 15.925100 6.665376  
H 7.779895 17.428783 7.261281  
H 11.905257 18.118935 8.203506  
H 10.538086 18.854106 7.349602  
H 11.304942 17.394125 6.698851  
H 6.592668 19.893971 11.986783  
H 6.873155 21.607362 11.554147  
H 7.971836 20.763570 12.665671  
H 10.497785 21.291473 10.992521

H 9.533753 22.294750 9.893740  
H 10.522327 20.969129 9.249988  
H 6.512704 19.482849 8.760162  
H 7.948528 19.941544 7.829149  
H 6.948001 21.193437 8.589490  
**Ts\_6**  
C 6.881168 9.322654 8.812302  
C 5.648819 9.289936 8.135480  
C 4.512189 8.638639 8.644637  
C 4.640818 7.983309 9.875343  
C 5.846586 7.995379 10.567062  
C 6.952836 8.661860 10.042376  
N 5.529762 9.942237 6.854544  
C 5.209974 11.277754 6.685383  
N 4.925250 11.408565 5.335447  
C 5.082780 10.175906 4.696772  
C 5.454602 9.273351 5.631653  
C 4.375112 12.590492 4.713075  
C 2.998160 12.847542 4.882269  
C 2.473280 13.970753 4.236603  
C 3.283072 14.793767 3.456909  
C 4.638402 14.518144 3.316669  
C 5.220497 13.412658 3.948966  
C 2.106875 11.927568 5.710813  
C 0.852464 12.625549 6.259341  
C 6.702580 13.113761 3.780374  
C 7.564843 14.387248 3.764884  
N 5.146424 12.167834 7.637267  
Si 5.694536 13.713796 7.881433

|    |          |           |           |   |          |           |           |
|----|----------|-----------|-----------|---|----------|-----------|-----------|
| Si | 4.928300 | 14.733172 | 9.818840  | H | 1.421484 | 14.211521 | 4.348425  |
| Si | 3.807843 | 16.620041 | 8.926301  | H | 7.015291 | 12.511106 | 4.640314  |
| C  | 2.807031 | 16.114759 | 7.403889  | H | 6.641422 | 12.869474 | 1.614527  |
| C  | 3.175905 | 8.636878  | 7.915607  | H | 6.395601 | 11.351710 | 2.494044  |
| C  | 2.064863 | 9.260395  | 8.778602  | H | 8.016702 | 12.063260 | 2.395794  |
| C  | 8.088501 | 10.022566 | 8.206594  | H | 7.404096 | 14.965573 | 2.847604  |
| C  | 9.109317 | 10.486391 | 9.254858  | H | 8.624038 | 14.111265 | 3.797993  |
| C  | 2.793856 | 7.216406  | 7.458564  | H | 7.344289 | 15.008279 | 4.634204  |
| C  | 8.772729 | 9.115842  | 7.160879  | H | 2.694188 | 11.590707 | 6.573439  |
| O  | 8.131163 | 13.374476 | 8.342927  | H | 1.107753 | 10.986178 | 4.018485  |
| C  | 8.342938 | 14.172184 | 7.458773  | H | 1.051136 | 10.031583 | 5.514657  |
| O  | 9.061736 | 14.826735 | 6.788888  | H | 2.544452 | 10.099859 | 4.564985  |
| O  | 6.510201 | 14.577255 | 6.832331  | H | 0.138149 | 12.853713 | 5.460242  |
| C  | 6.950203 | 12.294427 | 2.495233  | H | 1.100348 | 13.557267 | 6.774513  |
| C  | 1.683013 | 10.683302 | 4.900593  | H | 0.348743 | 11.964610 | 6.971909  |
| Si | 3.483718 | 13.230581 | 10.924720 | H | 7.883217 | 8.669261  | 10.600300 |
| C  | 1.923308 | 13.023567 | 9.876848  | H | 5.925925 | 7.489844  | 11.525774 |
| Si | 6.725346 | 15.407392 | 11.204858 | H | 3.781353 | 7.471226  | 10.299498 |
| C  | 8.099365 | 16.322794 | 10.287814 | H | 7.722620 | 10.916965 | 7.692480  |
| C  | 4.326795 | 11.557404 | 11.147096 | H | 8.080585 | 8.826222  | 6.364580  |
| C  | 2.990282 | 13.912376 | 12.621994 | H | 9.151075 | 8.202772  | 7.634886  |
| C  | 6.010483 | 16.583829 | 12.507819 | H | 9.618052 | 9.641287  | 6.702807  |
| C  | 7.466896 | 13.896817 | 12.067039 | H | 9.870449 | 11.107183 | 8.773186  |
| C  | 2.627574 | 17.344213 | 10.218602 | H | 9.617290 | 9.637195  | 9.725909  |
| C  | 5.068081 | 17.926913 | 8.405434  | H | 8.632720 | 11.086069 | 10.035603 |
| H  | 4.906430 | 10.066561 | 3.640105  | H | 3.273765 | 9.253285  | 7.017860  |
| H  | 5.670161 | 8.220462  | 5.555634  | H | 1.850236 | 7.237670  | 6.902218  |
| H  | 5.260365 | 15.178423 | 2.720882  | H | 2.666515 | 6.549105  | 8.318643  |
| H  | 2.853822 | 15.663183 | 2.966056  | H | 3.566695 | 6.789284  | 6.810690  |

|   |          |           |           |    |           |           |           |
|---|----------|-----------|-----------|----|-----------|-----------|-----------|
| H | 1.129945 | 9.313525  | 8.209342  | H  | 8.318022  | 14.195753 | 12.692806 |
| H | 2.337619 | 10.270941 | 9.090514  | C  |           |           |           |
| H | 1.877011 | 8.664944  | 9.678866  |    |           |           |           |
| H | 2.294513 | 16.987912 | 6.978796  | C  | 1.524290  | -2.123056 | 2.871167  |
| H | 2.047638 | 15.367554 | 7.654876  | C  | 0.406249  | -2.620183 | 2.177896  |
| H | 3.449951 | 15.692252 | 6.623153  | C  | -0.804193 | -2.949100 | 2.812196  |
| H | 2.132062 | 18.239507 | 9.820697  | C  | -0.870720 | -2.784996 | 4.200936  |
| H | 3.155775 | 17.629648 | 11.135391 | C  | 0.218326  | -2.297109 | 4.914430  |
| H | 1.848387 | 16.623038 | 10.492260 | C  | 1.400615  | -1.965245 | 4.255150  |
| H | 5.803445 | 17.492632 | 7.718423  | N  | 0.492268  | -2.818388 | 0.753098  |
| H | 5.603546 | 18.339327 | 9.267916  | C  | 0.230616  | -1.838885 | -0.191685 |
| H | 4.564761 | 18.756769 | 7.892282  | N  | 0.164398  | -2.520870 | -1.397979 |
| H | 2.182718 | 12.682739 | 8.869759  | C  | 0.393507  | -3.883866 | -1.188103 |
| H | 1.379069 | 13.970237 | 9.781979  | C  | 0.593136  | -4.067218 | 0.135098  |
| H | 1.242893 | 12.286685 | 10.322775 | C  | -0.255708 | -1.938652 | -2.650075 |
| H | 4.668511 | 11.168003 | 10.183113 | C  | -1.635251 | -1.722286 | -2.849331 |
| H | 3.632041 | 10.829612 | 11.585965 | C  | -2.028895 | -1.194459 | -4.082261 |
| H | 5.198480 | 11.631665 | 11.806414 | C  | -1.090835 | -0.899810 | -5.069385 |
| H | 2.544394 | 14.910571 | 12.545683 | C  | 0.263085  | -1.117152 | -4.840254 |
| H | 3.856124 | 13.980112 | 13.290676 | C  | 0.714661  | -1.636723 | -3.620587 |
| H | 2.254325 | 13.248610 | 13.094803 | C  | -2.661856 | -2.074008 | -1.777440 |
| H | 8.697424 | 15.641461 | 9.676807  | C  | -3.968433 | -1.274366 | -1.895493 |
| H | 8.768313 | 16.789096 | 11.023463 | C  | 2.198354  | -1.881386 | -3.384079 |
| H | 7.711303 | 17.111511 | 9.636074  | C  | 3.089858  | -0.799844 | -4.018772 |
| H | 5.638507 | 17.505590 | 12.045296 | N  | 0.025812  | -0.576878 | 0.036893  |
| H | 6.789990 | 16.861888 | 13.229273 | Si | 0.745015  | 0.888237  | -0.198226 |
| H | 5.182469 | 16.129117 | 13.062292 | Si | -0.436728 | 2.767080  | 0.469441  |
| H | 7.824162 | 13.169928 | 11.329745 | Si | -1.346548 | 3.683705  | -1.511921 |
| H | 6.733985 | 13.398170 | 12.711035 | C  | -2.062906 | 2.312416  | -2.595880 |

|    |           |           |           |   |           |           |           |
|----|-----------|-----------|-----------|---|-----------|-----------|-----------|
| C  | -2.014858 | -3.458157 | 2.043148  | H | 2.045900  | -4.077947 | -3.443146 |
| C  | -3.235062 | -2.542377 | 2.245685  | H | 3.678446  | -3.444896 | -3.720793 |
| C  | 2.823152  | -1.814950 | 2.142928  | H | 3.096922  | -0.884424 | -5.111612 |
| C  | 3.659375  | -0.724223 | 2.826480  | H | 4.120425  | -0.923812 | -3.671728 |
| C  | -2.344291 | -4.914387 | 2.422241  | H | 2.757733  | 0.202196  | -3.742935 |
| C  | 3.656168  | -3.102015 | 1.963634  | H | -2.217783 | -1.826660 | -0.806221 |
| O  | 2.437045  | 0.944021  | 0.268770  | H | -3.417837 | -3.868006 | -2.757506 |
| C  | 2.772365  | 1.186810  | -1.037054 | H | -3.714009 | -3.819605 | -1.007258 |
| O  | 3.872342  | 1.386909  | -1.485130 | H | -2.095587 | -4.194363 | -1.620671 |
| O  | 1.582485  | 1.162782  | -1.717098 | H | -4.547716 | -1.576570 | -2.775450 |
| C  | 2.614154  | -3.270926 | -3.914086 | H | -3.780156 | -0.199648 | -1.961669 |
| C  | -2.985734 | -3.583745 | -1.791494 | H | -4.589227 | -1.458597 | -1.013190 |
| Si | -2.090030 | 2.040822  | 1.986658  | H | 2.238052  | -1.577707 | 4.826254  |
| C  | -3.463783 | 1.175291  | 1.017824  | H | 0.145536  | -2.166100 | 5.990797  |
| Si | 1.116944  | 4.245611  | 1.467403  | H | -1.791600 | -3.028994 | 4.723992  |
| C  | 2.643223  | 4.512820  | 0.387655  | H | 2.562645  | -1.443334 | 1.147457  |
| C  | -1.340290 | 0.835481  | 3.230710  | H | 3.101393  | -3.863970 | 1.407113  |
| C  | -2.824194 | 3.522371  | 2.909265  | H | 3.929575  | -3.521265 | 2.938832  |
| C  | 0.267112  | 5.917819  | 1.734136  | H | 4.577342  | -2.881168 | 1.412870  |
| C  | 1.671245  | 3.551818  | 3.137654  | H | 4.488569  | -0.437521 | 2.173008  |
| C  | -2.725117 | 4.901542  | -1.060184 | H | 4.083407  | -1.074200 | 3.774886  |
| C  | -0.010940 | 4.592956  | -2.492010 | H | 3.061294  | 0.170674  | 3.019685  |
| H  | 0.383703  | -4.585649 | -2.004393 | H | -1.772742 | -3.445024 | 0.977019  |
| H  | 0.794627  | -4.958673 | 0.705522  | H | -3.189411 | -5.279309 | 1.827533  |
| H  | 0.983581  | -0.868418 | -5.612759 | H | -2.614797 | -4.991365 | 3.481221  |
| H  | -1.419414 | -0.486491 | -6.019228 | H | -1.487499 | -5.572252 | 2.242685  |
| H  | -3.079514 | -1.002381 | -4.272798 | H | -4.072489 | -2.889005 | 1.629581  |
| H  | 2.367892  | -1.866465 | -2.301130 | H | -2.999480 | -1.514461 | 1.961662  |
| H  | 2.448395  | -3.326479 | -4.996332 | H | -3.563928 | -2.540793 | 3.290632  |



|          |           |           |           |   |          |           |           |
|----------|-----------|-----------|-----------|---|----------|-----------|-----------|
| H        | -2.477688 | 2.734936  | -3.520527 | H | 1.156537 | 0.996196  | 1.459878  |
| H        | -2.868763 | 1.782596  | -2.077828 | C | 2.191345 | 0.720312  | 1.222105  |
| H        | -1.301750 | 1.575822  | -2.873847 | H | 2.843391 | 1.203024  | 1.959920  |
| H        | -3.131391 | 5.370529  | -1.965754 | C | 2.341598 | -0.778722 | 1.233309  |
| H        | -2.356213 | 5.697457  | -0.403337 | C | 2.004205 | -1.538336 | 0.123900  |
| H        | -3.549980 | 4.396835  | -0.543948 | H | 1.664599 | -1.037856 | -0.779872 |
| H        | 0.830295  | 3.927290  | -2.714784 | C | 2.088119 | -2.941529 | 0.139189  |
| H        | 0.373703  | 5.461195  | -1.945067 | H | 1.893249 | -3.190706 | -1.992854 |
| H        | -0.424211 | 4.951614  | -3.443859 | C | 1.679814 | -3.735780 | -1.068941 |
| H        | -3.049806 | 0.355284  | 0.422640  | H | 2.179416 | -4.707441 | -1.095925 |
| H        | -3.969369 | 1.865318  | 0.332579  | H | 0.597186 | -3.918081 | -1.038222 |
| H        | -4.219956 | 0.759712  | 1.696173  | C | 2.532670 | -3.593713 | 1.301511  |
| H        | -0.872669 | -0.011896 | 2.719177  | H | 2.604556 | -4.678737 | 1.306712  |
| H        | -2.112430 | 0.442151  | 3.904483  | C | 2.889850 | -2.885624 | 2.439409  |
| H        | -0.573294 | 1.321101  | 3.844265  | C | 3.419401 | -3.595528 | 3.658214  |
| H        | -3.225877 | 4.269795  | 2.215755  | H | 3.301024 | -2.993464 | 4.567144  |
| H        | -2.070757 | 4.014559  | 3.535138  | H | 4.488584 | -3.808519 | 3.535350  |
| H        | -3.641593 | 3.195436  | 3.565439  | H | 2.907756 | -4.549846 | 3.810486  |
| H        | 3.238191  | 3.598141  | 0.301543  | C | 2.792350 | -1.457790 | 2.410138  |
| H        | 3.278121  | 5.285760  | 0.841246  | B | 3.159449 | -0.689899 | 3.597932  |
| H        | 2.381103  | 4.843388  | -0.622435 | C | 3.524011 | 0.059949  | 4.797986  |
| H        | -0.009099 | 6.376868  | 0.777516  | C | 4.872917 | 0.014911  | 5.273566  |
| H        | 0.946360  | 6.607263  | 2.252412  | C | 5.184970 | 0.705595  | 6.434856  |
| H        | -0.643430 | 5.823799  | 2.335844  | H | 6.204087 | 0.676682  | 6.813411  |
| H        | 2.122917  | 2.561105  | 3.014347  | H | 6.881190 | -0.299922 | 4.554716  |
| H        | 0.833107  | 3.459360  | 3.837370  | C | 5.912809 | -0.808021 | 4.558655  |
| H        | 2.421465  | 4.211536  | 3.592729  | H | 6.046251 | -1.771392 | 5.065867  |
| <b>D</b> |           |           |           | H | 5.629438 | -1.013610 | 3.519515  |
| H        | 2.425680  | 1.131403  | 0.236434  | C | 4.212698 | 1.434062  | 7.140674  |

|                       |           |           |           |   |           |           |           |
|-----------------------|-----------|-----------|-----------|---|-----------|-----------|-----------|
| H                     | 3.733457  | 2.294201  | 9.059398  | C | 10.425134 | -3.612149 | 2.038436  |
| C                     | 4.587329  | 2.189223  | 8.384435  | C | 11.309412 | -3.459143 | 3.134703  |
| H                     | 4.921569  | 3.199720  | 8.113479  | C | 12.683173 | -3.393378 | 2.897033  |
| H                     | 5.410741  | 1.701023  | 8.912804  | C | 13.205653 | -3.484081 | 1.603920  |
| C                     | 2.892440  | 1.470424  | 6.659825  | C | 12.315141 | -3.614907 | 0.525644  |
| H                     | 2.143436  | 2.035093  | 7.210192  | C | 10.938212 | -3.671481 | 0.711873  |
| C                     | 2.523878  | 0.804500  | 5.500890  | C | 10.785426 | -3.305712 | 4.545742  |
| C                     | 1.119472  | 0.898322  | 4.963728  | C | 10.009126 | -3.809179 | -0.472133 |
| H                     | 1.006164  | 1.811938  | 4.367266  | C | 14.692926 | -3.456635 | 1.364286  |
| H                     | 0.870017  | 0.047027  | 4.318790  | H | 8.710009  | 0.186012  | 1.993231  |
| H                     | 0.388558  | 0.939855  | 5.775773  | H | 9.428004  | -1.096227 | 2.980008  |
| <b>CO<sub>2</sub></b> |           |           |           | H | 9.645609  | -1.109546 | 1.231212  |
| C                     | 0.440212  | 0.000000  | 0.311399  | H | 6.514971  | 0.104368  | 1.551051  |
| O                     | -0.234929 | 0.000000  | 1.265194  | H | 4.102057  | 0.196565  | 1.412894  |
| O                     | 1.114651  | 0.000000  | -0.643256 | H | 3.784077  | -0.929919 | 0.083117  |
| <b>Ts_a</b>           |           |           |           | H | 3.133301  | -1.276932 | 1.686416  |
| C                     | 6.476482  | -0.979646 | 1.626419  | H | 4.259152  | -3.541013 | 1.466862  |
| C                     | 5.247191  | -1.631202 | 1.474336  | H | 6.244246  | -5.633761 | 2.972944  |
| C                     | 5.209824  | -3.027911 | 1.592537  | H | 6.934212  | -5.815625 | 1.352746  |
| C                     | 6.345716  | -3.781829 | 1.856910  | H | 5.195187  | -5.564749 | 1.555066  |
| C                     | 7.606569  | -3.110742 | 2.002139  | H | 12.712038 | -3.676255 | -0.485505 |
| C                     | 7.653210  | -1.677835 | 1.872658  | H | 10.572221 | -3.829898 | -1.408035 |
| B                     | 8.926338  | -3.758381 | 2.254508  | H | 9.419050  | -4.731831 | -0.413050 |
| O                     | 8.708458  | -5.280213 | 3.086885  | H | 9.300675  | -2.973441 | -0.518289 |
| C                     | 9.617074  | -6.040033 | 3.246422  | H | 15.231149 | -3.077484 | 2.237098  |
| O                     | 10.465818 | -6.794232 | 3.412790  | H | 14.940782 | -2.836194 | 0.497034  |
| C                     | 6.178626  | -5.282025 | 1.937168  | H | 15.059338 | -4.469625 | 1.154361  |
| C                     | 3.996812  | -0.860812 | 1.158193  | H | 13.360269 | -3.259957 | 3.738152  |
| C                     | 8.930359  | -0.883156 | 2.028492  | H | 11.152075 | -2.373157 | 4.987604  |

H 9.689767 -3.272132 4.581557  
H 11.125711 -4.122419 5.193016  
E  
C -2.735878 0.000554 1.031287  
C -1.614686 -0.000277 0.123965  
C -1.882014 -0.003310 -1.298276  
C -3.198493 -0.003501 -1.745555  
C -4.284081 -0.000357 -0.864447  
C -4.023483 -0.000249 0.513578  
B -0.167548 -0.001616 0.472160  
O 0.097193 0.003218 2.228202  
C 1.198184 0.007112 2.691808  
O 2.240802 0.011804 3.172315  
C -0.801482 -0.007188 -2.355299  
C -5.697336 0.018002 -1.371500  
C -2.613712 -0.000319 2.536825  
C 1.245838 -0.000180 -0.101743  
C 1.901956 1.229727 -0.364500  
C 3.199032 1.203932 -0.872972  
C 3.869712 -0.001783 -1.120536  
C 3.207750 -1.205750 -0.849665  
C 1.909071 -1.229313 -0.342134  
C 1.195048 2.541289 -0.110508  
C 1.202373 -2.541805 -0.093487  
C 5.287043 -0.000977 -1.633697  
H -1.259490 -0.017024 -3.346742  
H -0.160861 0.877420 -2.287611  
H -0.152256 -0.883829 -2.273332  
H -3.386678 -0.008224 -2.816170

H -5.743693 -0.191083 -2.442935  
H -6.312772 -0.711382 -0.834511  
H -6.143175 1.005593 -1.194969  
H -4.862546 -0.002813 1.205041  
H -2.084389 0.885454 2.901674  
H -2.080056 -0.883959 2.900465  
H -3.610395 -0.002608 2.983090  
H 3.717578 -2.148503 -1.037091  
H 1.911721 -3.371849 -0.049589  
H 0.636415 -2.532688 0.846371  
H 0.487009 -2.754999 -0.897559  
H 5.991583 0.031281 -0.792473  
H 5.481629 0.874202 -2.260477  
H 5.501234 -0.905664 -2.209976  
H 3.703291 2.145942 -1.078506  
H 1.847922 3.390192 -0.326185  
H 0.299169 2.634424 -0.737150  
H 0.868082 2.629310 0.933746  
**Ts\_b**  
C -2.640162 -0.033244 1.155104  
C -1.546936 -0.013859 0.217627  
C -1.852744 -0.006218 -1.190943  
C -3.180894 -0.014937 -1.602576  
C -4.242040 -0.031848 -0.691933  
C -3.944846 -0.042922 0.679032  
B -0.097432 -0.006046 0.592287  
O 0.249558 -0.010834 2.139499  
C 1.462483 -0.000146 2.326911  
O 2.510339 0.011835 2.791955

|   |           |           |           |   |          |           |           |
|---|-----------|-----------|-----------|---|----------|-----------|-----------|
| C | -0.801029 | 0.007795  | -2.275880 | H | 5.444907 | -0.870095 | -2.416255 |
| C | -5.666505 | -0.022579 | -1.169254 | H | 3.695109 | 2.168504  | -1.184543 |
| C | -2.451907 | -0.047150 | 2.654653  | H | 1.862623 | 3.402669  | -0.342891 |
| C | 1.291231  | 0.007435  | -0.104584 | H | 0.313721 | 2.640287  | -0.743500 |
| C | 1.927743  | 1.243181  | -0.402026 | H | 0.899139 | 2.626252  | 0.919966  |
| C | 3.201990  | 1.224501  | -0.962740 | F |          |           |           |
| C | 3.864615  | 0.021319  | -1.246375 | C | 5.483015 | -2.184897 | 4.983032  |
| C | 3.219227  | -1.188193 | -0.957203 | C | 5.050276 | -0.892169 | 4.427238  |
| C | 1.943313  | -1.219999 | -0.397796 | C | 6.005167 | -0.103010 | 3.639911  |
| C | 1.217105  | 2.548267  | -0.127893 | C | 7.236366 | -0.645776 | 3.353435  |
| C | 1.241252  | -2.533411 | -0.143213 | C | 7.620318 | -1.908951 | 3.849995  |
| C | 5.254826  | 0.031236  | -1.826638 | C | 6.729938 | -2.658914 | 4.652832  |
| H | -1.283212 | 0.008664  | -3.255916 | B | 3.495697 | -1.002867 | 3.745424  |
| H | -0.161290 | 0.893367  | -2.215226 | C | 2.777174 | -1.660841 | 2.591945  |
| H | -0.147511 | -0.868020 | -2.222894 | C | 1.339481 | -1.615532 | 2.554706  |
| H | -3.399307 | -0.011405 | -2.667496 | C | 0.666588 | -2.235911 | 1.507255  |
| H | -5.729834 | -0.229455 | -2.240554 | C | 1.340169 | -2.899221 | 0.473519  |
| H | -6.267007 | -0.758596 | -0.624781 | C | 2.737706 | -2.934772 | 0.510164  |
| H | -6.116585 | 0.961397  | -0.984217 | C | 3.464047 | -2.337161 | 1.536484  |
| H | -4.763552 | -0.061604 | 1.394587  | C | 0.504520 | -0.930960 | 3.611457  |
| H | -1.912680 | 0.839941  | 3.003471  | C | 4.967171 | -2.414136 | 1.466516  |
| H | -1.891405 | -0.928281 | 2.984507  | C | 0.573363 | -3.543489 | -0.648836 |
| H | -3.424992 | -0.063866 | 3.150167  | C | 5.625762 | 1.271255  | 3.183106  |
| H | 3.724105  | -2.126962 | -1.174749 | C | 8.959970 | -2.471041 | 3.511724  |
| H | 1.945491  | -3.368631 | -0.151101 | C | 4.557116 | -2.952276 | 5.877003  |
| H | 0.719208  | -2.541577 | 0.822159  | O | 2.947700 | -0.201549 | 4.786665  |
| H | 0.484914  | -2.723271 | -0.915155 | C | 4.167889 | -0.044380 | 5.394701  |
| H | 5.998902  | 0.064189  | -1.020249 | O | 4.416116 | 0.581043  | 6.379065  |
| H | 5.413704  | 0.910355  | -2.457868 | H | 5.277941 | -3.054759 | 0.638098  |

|             |           |           |           |   |           |           |           |
|-------------|-----------|-----------|-----------|---|-----------|-----------|-----------|
| H           | 5.405948  | -1.424452 | 1.303444  | O | 3.767997  | -0.620013 | -1.418180 |
| H           | 5.393550  | -2.826727 | 2.384925  | C | 4.645863  | 1.908870  | 1.277902  |
| H           | 3.275244  | -3.444608 | -0.285882 | C | 0.179566  | 1.893027  | 3.580288  |
| H           | 1.227004  | -4.137941 | -1.291922 | C | 0.643468  | -0.523587 | -0.819122 |
| H           | -0.221254 | -4.187980 | -0.257036 | O | 3.718248  | 1.664458  | -1.664095 |
| H           | 0.089305  | -2.775476 | -1.265162 | B | 3.034011  | 2.592723  | -0.967164 |
| H           | -0.420649 | -2.205509 | 1.495205  | C | 2.833498  | 4.070733  | -0.882849 |
| H           | 0.715066  | 0.142409  | 3.655150  | C | 3.944907  | 4.868289  | -1.324515 |
| H           | 0.698974  | -1.338150 | 4.609100  | C | 3.836324  | 6.250208  | -1.239563 |
| H           | -0.556699 | -1.062955 | 3.388469  | C | 2.677339  | 6.882395  | -0.761248 |
| H           | 7.051641  | -3.624955 | 5.031534  | C | 1.599983  | 6.088907  | -0.355811 |
| H           | 4.978525  | -3.925229 | 6.132783  | C | 1.655447  | 4.698095  | -0.402681 |
| H           | 4.373762  | -2.396070 | 6.805149  | C | 5.213355  | 4.258360  | -1.871975 |
| H           | 3.581858  | -3.111429 | 5.398455  | C | 0.453584  | 3.905749  | 0.034401  |
| H           | 9.665948  | -1.691577 | 3.218691  | C | 2.595008  | 8.383869  | -0.718266 |
| H           | 8.843170  | -3.156740 | 2.659130  | H | -0.454730 | 4.298272  | -0.433613 |
| H           | 9.364470  | -3.058911 | 4.340444  | H | 0.538322  | 2.849626  | -0.231322 |
| H           | 7.939623  | -0.083303 | 2.745946  | H | 0.320277  | 3.980036  | 1.118648  |
| H           | 6.300099  | 1.626065  | 2.402055  | H | 0.690822  | 6.567502  | 0.001012  |
| H           | 4.596011  | 1.308479  | 2.809023  | H | 1.743228  | 8.721386  | -0.122530 |
| H           | 5.686006  | 1.968104  | 4.030202  | H | 3.513382  | 8.814334  | -0.306101 |
| <b>Ts_c</b> |           |           |           | H | 2.479420  | 8.781522  | -1.734647 |
| C           | 1.222845  | 0.342681  | 0.264939  | H | 4.678734  | 6.859441  | -1.559340 |
| C           | 2.561039  | 0.837648  | 0.165794  | H | 5.661712  | 3.545433  | -1.170995 |
| C           | 3.170125  | 1.584304  | 1.227054  | H | 5.949626  | 5.038896  | -2.073926 |
| C           | 2.354821  | 1.940146  | 2.307565  | H | 5.020943  | 3.720440  | -2.806899 |
| C           | 1.032737  | 1.509954  | 2.405468  | H | 2.790151  | 2.523474  | 3.114234  |
| C           | 0.490614  | 0.704220  | 1.380563  | H | 4.806637  | 2.991842  | 1.308551  |
| C           | 3.408519  | 0.429800  | -0.995628 | H | 5.058912  | 1.493618  | 2.202461  |

H 5.210892 1.488553 0.443354  
H -0.331270 1.014756 3.988366  
H -0.599418 2.596789 3.260268  
H 0.768438 2.366574 4.368547  
H -0.537073 0.361215 1.467392  
H -0.427296 -0.666490 -0.664222  
H 0.796753 -0.078464 -1.808822  
H 1.130956 -1.504794 -0.825698

**G**

C -0.425191 3.238167 0.579982  
C 0.465814 2.586755 -0.300801  
C -0.018754 1.664356 -1.265405  
C -1.385415 1.410100 -1.319533  
C -2.287975 2.043157 -0.449119  
C -1.791422 2.954039 0.486275  
B 1.951546 2.867724 -0.214870  
O 3.154890 3.081029 -0.154865  
C 0.930926 0.986659 -2.223809  
C -3.760999 1.725395 -0.516820  
C 0.067680 4.218458 1.617147  
H -0.106920 3.830192 2.627164  
H 1.139408 4.420065 1.515758  
H -0.466087 5.171261 1.535252  
H -2.482212 3.455649 1.161361  
H -4.353483 2.461726 0.033192  
H -4.110240 1.695738 -1.554450  
H -3.958973 0.738198 -0.080172  
H -1.762100 0.703843 -2.056791  
H 1.377547 1.716559 -2.910434

H 0.413199 0.231935 -2.821026  
H 1.753329 0.497386 -1.688875

**g**

H -0.440047 3.222929 0.569002  
C 0.271182 2.721696 -0.096948  
H -0.283153 2.051230 -0.755893  
H 0.941914 2.114185 0.523440  
C 1.067965 3.707040 -0.899547  
C 1.328977 3.531500 -2.246837  
H 0.919444 2.658209 -2.746486  
C 2.106356 4.444086 -2.981761  
C 2.378346 4.215651 -4.437078  
H 2.043435 5.079461 -5.023514  
H 1.882585 3.316516 -4.807270  
H 3.458498 4.120681 -4.602997  
C 2.638689 5.583985 -2.344675  
H 3.234120 6.285739 -2.922281  
C 2.425763 5.841915 -1.005542  
C 2.976176 7.053094 -0.311457  
H 3.588869 6.765903 0.551208  
H 3.594385 7.637437 -0.994497  
H 2.163137 7.692882 0.052661  
C 1.629593 4.879589 -0.293860  
O 1.207014 5.275554 2.147982  
C 1.397945 5.093491 1.037640

**D'**

H 1.248491 0.154478 3.468971  
C 0.354316 -0.254972 3.011586  
C -0.251305 -1.374350 3.585546

|    |           |           |          |              |           |           |          |
|----|-----------|-----------|----------|--------------|-----------|-----------|----------|
| Cl | 0.452736  | -2.070998 | 5.017911 | B            | -3.175180 | 2.851185  | 3.834573 |
| C  | -1.402677 | -1.921811 | 3.004056 | H            | -2.055275 | 2.508738  | 1.700055 |
| Cl | -2.175825 | -3.324407 | 3.685988 | C            | -4.587268 | 4.847863  | 5.419068 |
| C  | -1.943038 | -1.344667 | 1.853248 | H            | -5.388584 | 4.102599  | 5.346596 |
| H  | -2.832203 | -1.781266 | 1.411383 | H            | -4.992663 | 5.736231  | 5.908328 |
| H  | -1.755744 | 0.203778  | 0.380686 | C            | -3.367009 | 4.186480  | 3.271502 |
| C  | -1.333697 | -0.229829 | 1.281926 | H            | -2.758514 | 3.224967  | 0.239905 |
| C  | -0.185544 | 0.314775  | 1.860680 | C            | -2.179349 | 3.444843  | 1.143783 |
| H  | 0.298953  | 1.179051  | 1.417451 | H            | -1.188657 | 3.786921  | 0.827445 |
| C  | -2.010567 | 0.241198  | 6.259338 | H            | -3.806551 | 4.429159  | 6.065635 |
| H  | -1.229611 | 0.089548  | 7.000038 | C            | -4.046568 | 5.183184  | 4.052240 |
| C  | -1.992060 | 1.384858  | 5.481008 | C            | -4.194340 | 6.447454  | 3.511639 |
| C  | -0.888227 | 2.400475  | 5.613493 | H            | -4.701518 | 7.215735  | 4.090453 |
| H  | -1.262739 | 3.427401  | 5.523423 | C            | -3.703836 | 6.767742  | 2.229133 |
| H  | -0.148736 | 2.253112  | 4.816679 | C            | -3.887490 | 8.156465  | 1.686687 |
| H  | -0.374511 | 2.304079  | 6.572626 | H            | -4.952553 | 8.414498  | 1.655078 |
| H  | -3.218863 | -1.652504 | 8.037176 | H            | -3.402200 | 8.887481  | 2.344315 |
| H  | -3.757985 | -2.677461 | 6.688201 | H            | -3.470563 | 8.256194  | 0.682133 |
| H  | -2.022505 | -2.421285 | 6.992860 | C            | -3.050169 | 5.783158  | 1.476987 |
| C  | -3.014526 | -0.734813 | 6.114774 | H            | -2.674485 | 6.032227  | 0.487436 |
| C  | -3.009324 | -1.946779 | 7.001034 | C            | -2.871204 | 4.495888  | 1.969825 |
| C  | -4.008758 | -0.560438 | 5.141397 |              |           |           |          |
| H  | -4.769255 | -1.326898 | 5.016600 | <b>Ts_a'</b> |           |           |          |
| C  | -4.041815 | 0.566747  | 4.332389 | C            | 5.911316  | 0.080267  | 3.982522 |
| H  | -4.780296 | 0.162677  | 2.364329 | C            | 5.092268  | -1.022747 | 4.322217 |
| H  | -6.051011 | 0.317429  | 3.584835 | C            | 5.601921  | -2.063834 | 5.145601 |
| C  | -5.087001 | 0.717345  | 3.259832 | C            | 6.910440  | -1.967582 | 5.608505 |
| H  | -5.225663 | 1.764409  | 2.963576 | C            | 7.737071  | -0.881622 | 5.276974 |
| C  | -3.040293 | 1.569797  | 4.519468 | C            | 7.222283  | 0.127821  | 4.458600 |

|    |           |           |           |    |           |           |           |
|----|-----------|-----------|-----------|----|-----------|-----------|-----------|
| B  | 3.655685  | -1.085330 | 3.814734  | H  | 0.756951  | -5.779717 | 1.014883  |
| O  | 2.796259  | 0.128880  | 4.785511  | H  | -0.536508 | -4.614941 | 0.658474  |
| C  | 3.333601  | 0.654931  | 5.713785  | H  | -0.450814 | -2.872883 | 2.271947  |
| O  | 3.816509  | 1.177157  | 6.615278  | H  | 0.685009  | 0.114827  | 3.541114  |
| C  | 4.746810  | -3.257314 | 5.502472  | H  | 0.609560  | -1.064200 | 4.857047  |
| C  | 9.141672  | -0.799879 | 5.816784  | H  | -0.596252 | -1.105495 | 3.565143  |
| C  | 5.389403  | 1.182031  | 3.088412  | H  | 7.302573  | -2.757241 | 6.246079  |
| C  | 2.742197  | -1.829967 | 2.907436  | H  | 5.224444  | -3.863233 | 6.276206  |
| C  | 1.305988  | -1.876625 | 2.965774  | H  | 3.759421  | -2.953785 | 5.869152  |
| C  | 0.633970  | -2.837153 | 2.219855  | H  | 4.582957  | -3.897764 | 4.626821  |
| C  | 1.298063  | -3.742703 | 1.383657  | H  | 9.750618  | -0.099735 | 5.238750  |
| C  | 2.689036  | -3.636004 | 1.258877  | H  | 9.625364  | -1.781706 | 5.809139  |
| C  | 3.422570  | -2.705986 | 1.980775  | H  | 9.125361  | -0.452433 | 6.857722  |
| C  | 0.541647  | -4.782862 | 0.609538  | H  | 7.857046  | 0.967018  | 4.181572  |
| C  | 0.459855  | -0.928735 | 3.780767  | H  | 6.062322  | 1.346388  | 2.240766  |
| C  | 4.908846  | -2.631582 | 1.715783  | H  | 4.400616  | 0.940544  | 2.678173  |
| Cl | -0.415551 | -1.464499 | -0.895929 | H  | 5.310660  | 2.132901  | 3.628540  |
| C  | 1.088241  | -0.638535 | -0.601543 | H  | 2.265517  | 2.073409  | 1.067651  |
| C  | 1.088466  | 0.498231  | 0.208484  | H  | 4.397440  | 1.272905  | 0.038709  |
| C  | 2.277485  | 1.184827  | 0.443697  | H  | 4.395496  | -0.763695 | -1.376534 |
| C  | 3.468905  | 0.736777  | -0.129049 | H  | 0.153700  | 0.837491  | 0.642063  |
| C  | 3.475583  | -0.402792 | -0.929506 | E' |           |           |           |
| C  | 2.286834  | -1.093909 | -1.166968 | C  | -0.904604 | -0.953755 | 1.488850  |
| Cl | 2.325315  | -2.515342 | -2.172345 | C  | 0.118848  | -0.861307 | 0.479457  |
| H  | 5.144013  | -3.181341 | 0.801162  | C  | -0.096637 | -1.541494 | -0.777497 |
| H  | 5.247029  | -1.599408 | 1.591176  | C  | -1.230425 | -2.325583 | -0.945265 |
| H  | 5.493918  | -3.072766 | 2.529621  | C  | -2.183595 | -2.478741 | 0.067241  |
| H  | 3.208842  | -4.283284 | 0.557575  | C  | -2.007169 | -1.765204 | 1.259737  |
| H  | 0.855544  | -4.785194 | -0.439204 | B  | 1.464897  | -0.241112 | 0.626828  |



|    |           |           |           |   |              |           |           |
|----|-----------|-----------|-----------|---|--------------|-----------|-----------|
| O  | 1.661471  | 0.584325  | 2.134438  | H | -4.251036    | -2.979668 | 0.393317  |
| C  | 2.738115  | 1.005173  | 2.450121  | H | -2.771747    | -1.834857 | 2.028900  |
| O  | 3.746237  | 1.423595  | 2.801341  | H | -0.708505    | 0.862979  | 2.655419  |
| C  | 0.849490  | -1.435116 | -1.950934 | H | -0.082189    | -0.581399 | 3.462389  |
| C  | -3.369580 | -3.380692 | -0.114702 | H | -1.826455    | -0.336820 | 3.316379  |
| C  | -0.872111 | -0.208316 | 2.801544  | H | 5.749008     | -1.875351 | -0.345454 |
| C  | 2.838469  | -0.132519 | -0.043468 | H | 4.268206     | -3.049614 | 1.090516  |
| C  | 3.204791  | 1.037175  | -0.756387 | H | 2.862301     | -2.230987 | 1.787648  |
| C  | 4.478399  | 1.119189  | -1.314653 | H | 2.713216     | -3.075789 | 0.245585  |
| C  | 5.406939  | 0.077845  | -1.182918 | H | 7.235851     | 1.158636  | -1.554911 |
| C  | 5.032012  | -1.066484 | -0.469200 | H | 6.709635     | 0.136666  | -2.893440 |
| C  | 3.765306  | -1.194784 | 0.102254  | H | 7.438422     | -0.605712 | -1.457326 |
| C  | 2.209770  | 2.157110  | -0.949339 | H | 4.758194     | 2.018377  | -1.859774 |
| C  | 3.385226  | -2.452714 | 0.849070  | H | 2.706678     | 3.090170  | -1.225495 |
| C  | 6.777358  | 0.194512  | -1.800239 | H | 1.500625     | 1.905516  | -1.746131 |
| Cl | -4.526931 | -0.321700 | -1.586651 | H | 1.616849     | 2.345358  | -0.045550 |
| C  | -3.348071 | 0.871309  | -1.122019 | H | -2.384363    | 2.787766  | 1.514440  |
| C  | -3.328550 | 1.406031  | 0.172775  | H | -0.737532    | 3.572606  | -0.169512 |
| C  | -2.383368 | 2.376299  | 0.510718  | H | -2.443691    | 0.879608  | -3.066515 |
| C  | -1.461103 | 2.809717  | -0.438988 | H | -0.769592    | 2.612526  | -2.476082 |
| C  | -1.478079 | 2.273099  | -1.727408 |   | <b>Ts_b'</b> |           |           |
| C  | -2.417007 | 1.302933  | -2.068243 | C | -2.774011    | 0.370244  | 0.607578  |
| Cl | -4.472653 | 0.887704  | 1.379137  | C | -1.600219    | 0.301104  | -0.221675 |
| H  | 0.390036  | -1.883689 | -2.834505 | C | -1.777295    | 0.121776  | -1.640799 |
| H  | 1.095492  | -0.395386 | -2.183474 | C | -3.055602    | -0.059608 | -2.154268 |
| H  | 1.792914  | -1.958391 | -1.762811 | C | -4.190024    | -0.071923 | -1.334589 |
| H  | -1.383804 | -2.828308 | -1.896773 | C | -4.023214    | 0.168680  | 0.035447  |
| H  | -3.599304 | -3.529894 | -1.172536 | B | -0.194715    | 0.273766  | 0.291267  |
| H  | -3.153701 | -4.363886 | 0.324953  | O | 0.004870     | 0.462988  | 1.857894  |

|    |           |           |           |           |           |           |           |
|----|-----------|-----------|-----------|-----------|-----------|-----------|-----------|
| C  | 1.176659  | 0.288660  | 2.175897  | H         | -4.903724 | 0.216437  | 0.670490  |
| O  | 2.165284  | 0.172190  | 2.744830  | H         | -2.166276 | 1.576007  | 2.301370  |
| C  | -0.630897 | 0.136219  | -2.624922 | H         | -2.276983 | -0.153562 | 2.654609  |
| C  | -5.553914 | -0.336554 | -1.904663 | H         | -3.750120 | 0.805226  | 2.462577  |
| C  | -2.733967 | 0.665335  | 2.087794  | H         | 3.336661  | -2.622887 | -0.865061 |
| C  | 1.241402  | -0.007871 | -0.236881 | H         | 1.276331  | -3.443519 | -0.014074 |
| C  | 2.132534  | 1.062307  | -0.524852 | H         | 0.150092  | -2.350379 | 0.806145  |
| C  | 3.433114  | 0.771110  | -0.925643 | H         | 0.016223  | -2.604276 | -0.932978 |
| C  | 3.882896  | -0.549838 | -1.059730 | H         | 6.013348  | -0.249939 | -0.929576 |
| C  | 2.994510  | -1.594407 | -0.774360 | H         | 5.416369  | -0.540342 | -2.563717 |
| C  | 1.681686  | -1.352030 | -0.373479 | H         | 5.536485  | -1.892242 | -1.421556 |
| C  | 1.657915  | 2.492717  | -0.438769 | H         | 4.115559  | 1.591041  | -1.139754 |
| C  | 0.734610  | -2.499635 | -0.110128 | H         | 2.497956  | 3.190789  | -0.412856 |
| C  | 5.291617  | -0.831267 | -1.513353 | H         | 1.038957  | 2.740870  | -1.308853 |
| Cl | -5.237068 | 3.202007  | -2.388095 | H         | 1.040292  | 2.673243  | 0.449454  |
| C  | -3.823604 | 3.648141  | -1.476435 | H         | -2.774130 | 4.245399  | 1.700705  |
| C  | -3.868412 | 3.769428  | -0.081433 | H         | -0.657965 | 4.711211  | 0.489994  |
| C  | -2.723526 | 4.148509  | 0.621526  | H         | -2.611492 | 3.799337  | -3.239521 |
| C  | -1.539436 | 4.405764  | -0.064988 | H         | -0.577702 | 4.488763  | -1.997514 |
| C  | -1.494019 | 4.280400  | -1.454345 | <b>F'</b> |           |           |           |
| C  | -2.632236 | 3.898506  | -2.159579 | C         | -0.902651 | -1.237302 | 1.260617  |
| Cl | -5.336956 | 3.461888  | 0.802955  | C         | 0.126894  | -0.795356 | 0.363768  |
| H  | -1.020534 | 0.147679  | -3.645535 | C         | 0.099904  | -1.254343 | -0.987420 |
| H  | 0.006241  | 1.014834  | -2.493641 | C         | -0.889698 | -2.139750 | -1.396605 |
| H  | 0.007437  | -0.747393 | -2.521749 | C         | -1.867335 | -2.614251 | -0.513656 |
| H  | -3.177710 | -0.189715 | -3.226780 | C         | -1.857396 | -2.141105 | 0.802459  |
| H  | -5.594675 | -0.098198 | -2.970560 | B         | 1.233642  | 0.071485  | 0.908932  |
| H  | -5.800171 | -1.400510 | -1.788089 | O         | 1.291248  | 0.791332  | 2.131265  |
| H  | -6.320500 | 0.238259  | -1.377506 | C         | 2.630022  | 1.071234  | 1.982387  |

|    |           |           |           |              |           |           |           |
|----|-----------|-----------|-----------|--------------|-----------|-----------|-----------|
| O  | 3.331092  | 1.676550  | 2.733364  | H            | -1.130567 | 0.303138  | 2.761379  |
| C  | 1.102247  | -0.780741 | -2.006821 | H            | -0.094577 | -1.028727 | 3.264751  |
| C  | -2.898150 | -3.612148 | -0.964029 | H            | -1.850043 | -1.259936 | 3.183478  |
| C  | -0.998005 | -0.781491 | 2.696751  | H            | 4.962958  | -2.174988 | -0.373551 |
| C  | 2.891966  | 0.387918  | 0.609452  | H            | 3.966954  | -2.738065 | 1.695173  |
| C  | 3.184376  | 1.323847  | -0.481837 | H            | 3.824550  | -1.319475 | 2.756198  |
| C  | 4.039257  | 0.929015  | -1.483258 | H            | 2.379132  | -2.014471 | 2.016998  |
| C  | 4.682356  | -0.327865 | -1.453545 | H            | 6.543051  | -0.106998 | -2.446944 |
| C  | 4.453114  | -1.216018 | -0.380074 | H            | 5.197183  | -0.446099 | -3.527465 |
| C  | 3.625695  | -0.884445 | 0.669101  | H            | 5.888101  | -1.757959 | -2.522992 |
| C  | 2.563626  | 2.685544  | -0.469023 | H            | 4.234541  | 1.600708  | -2.314108 |
| C  | 3.440788  | -1.794496 | 1.844750  | H            | 2.651429  | 3.169451  | -1.442817 |
| C  | 5.623488  | -0.699776 | -2.551224 | H            | 1.507055  | 2.641805  | -0.184712 |
| Cl | -4.159698 | -0.282198 | -1.673554 | H            | 3.069595  | 3.314638  | 0.275191  |
| C  | -3.049212 | 0.882014  | -1.013390 | H            | -2.318552 | 2.537962  | 1.864471  |
| C  | -3.122543 | 1.271132  | 0.331285  | H            | -0.622920 | 3.564318  | 0.377365  |
| C  | -2.241972 | 2.233930  | 0.826188  | H            | -2.030125 | 1.124337  | -2.884439 |
| C  | -1.286433 | 2.799697  | -0.014890 | H            | -0.463127 | 2.839744  | -2.012641 |
| C  | -1.201947 | 2.399777  | -1.349763 |              |           |           |           |
| C  | -2.080632 | 1.441059  | -1.848354 | <b>Ts_c'</b> |           |           |           |
| Cl | -4.302101 | 0.577643  | 1.406288  | C            | 1.210716  | 0.360269  | 0.237730  |
| H  | 0.849486  | -1.157729 | -3.000572 | C            | 2.518709  | 0.842007  | 0.175883  |
| H  | 1.136588  | 0.311643  | -2.060050 | C            | 3.065467  | 1.519345  | 1.264224  |
| H  | 2.107297  | -1.139811 | -1.762463 | C            | 2.302061  | 1.723214  | 2.414859  |
| H  | -0.909505 | -2.465416 | -2.433890 | C            | 0.994382  | 1.243478  | 2.482014  |
| H  | -3.068433 | -3.548597 | -2.042101 | C            | 0.447039  | 0.557026  | 1.397855  |
| H  | -2.554841 | -4.630317 | -0.738362 | Cl           | -1.182547 | -0.038994 | 1.514209  |
| H  | -3.847398 | -3.461321 | -0.442073 | Cl           | 0.553192  | -0.471937 | -1.139699 |
| H  | -2.628185 | -2.477912 | 1.491040  | C            | 0.754187  | -3.229848 | 1.863926  |
|    |           |           |           | C            | 1.368017  | -2.460776 | 2.843257  |

|   |           |           |           |           |           |           |           |
|---|-----------|-----------|-----------|-----------|-----------|-----------|-----------|
| C | 2.696029  | -1.969647 | 2.593242  | H         | -0.336351 | -2.688873 | 4.125712  |
| C | 3.335268  | -2.258501 | 1.359654  | H         | 0.423219  | -1.093070 | 4.222599  |
| C | 2.663667  | -3.024674 | 0.412027  | H         | 6.342247  | -3.931756 | 4.024577  |
| C | 1.378058  | -3.522221 | 0.642361  | H         | 3.623977  | -3.553847 | 4.994738  |
| C | 4.713843  | -1.753339 | 1.035317  | H         | 4.968983  | -3.725311 | 6.117277  |
| B | 3.284554  | -1.155780 | 3.696030  | H         | 3.841552  | -2.373314 | 6.306545  |
| O | 2.930280  | -0.443662 | 4.788070  | H         | 9.308169  | -2.421155 | 2.674197  |
| C | 4.183000  | -0.032259 | 5.348145  | H         | 8.143439  | -2.813111 | 1.411004  |
| C | 5.212365  | -0.762086 | 4.549588  | H         | 8.369186  | -3.935743 | 2.767197  |
| C | 5.273877  | -2.192372 | 4.667938  | H         | 7.972390  | -0.201588 | 2.651858  |
| C | 6.284582  | -2.848714 | 3.960504  | H         | 6.893325  | 1.866745  | 3.091721  |
| C | 7.252350  | -2.150917 | 3.236872  | H         | 5.209613  | 1.877333  | 3.656841  |
| C | 7.208243  | -0.740701 | 3.205544  | H         | 6.523568  | 1.867931  | 4.828644  |
| C | 6.224788  | -0.022301 | 3.860180  | H         | 4.081171  | 1.896856  | 1.200268  |
| C | 0.621537  | -2.165810 | 4.120876  | H         | 0.390556  | 1.401222  | 3.368983  |
| C | 0.654572  | -4.318734 | -0.407508 | H         | 3.097563  | 0.684031  | -0.727353 |
| C | 4.365525  | -2.992349 | 5.575471  | H         | 2.708479  | 2.268677  | 3.261032  |
| C | 8.331462  | -2.880086 | 2.490455  | <b>G'</b> |           |           |           |
| C | 6.211482  | 1.481488  | 3.851889  | H         | -3.157559 | 0.504347  | -1.411253 |
| O | 4.247835  | 0.773527  | 6.220036  | C         | -2.324851 | 0.541735  | -2.121452 |
| H | 4.759105  | -1.393805 | 0.003438  | H         | -1.657543 | 1.359798  | -1.837516 |
| H | 5.017282  | -0.934557 | 1.690536  | H         | -1.768248 | -0.398166 | -2.019463 |
| H | 5.445128  | -2.562756 | 1.132257  | C         | -2.821408 | 0.701058  | -3.536257 |
| H | 3.149273  | -3.226740 | -0.539613 | C         | -3.915464 | -0.050284 | -3.991319 |
| H | 1.336719  | -4.668980 | -1.186027 | H         | -4.413670 | -0.736132 | -3.309663 |
| H | 0.142028  | -5.178600 | 0.035326  | C         | -4.374931 | 0.048362  | -5.300289 |
| H | -0.111751 | -3.693105 | -0.882604 | C         | -5.541555 | -0.783225 | -5.773903 |
| H | -0.249298 | -3.604681 | 2.050745  | H         | -6.349509 | -0.148215 | -6.156996 |
| H | 1.184833  | -2.477882 | 5.007272  | H         | -5.238600 | -1.455297 | -6.586305 |

|    |           |           |           |   |           |           |           |
|----|-----------|-----------|-----------|---|-----------|-----------|-----------|
| H  | -5.940727 | -1.395826 | -4.962172 | N | 12.148678 | 10.729738 | 15.032896 |
| Cl | -0.275379 | -1.746854 | -4.482769 | N | 10.201311 | 11.875338 | 14.168364 |
| C  | -0.893868 | -1.506239 | -6.092876 | N | 10.418128 | 11.805845 | 16.360389 |
| C  | -2.003281 | -2.223474 | -6.558232 | C | 11.036647 | 11.383294 | 15.175720 |
| Cl | -2.818753 | -3.381617 | -5.544222 | C | 9.274031  | 12.551671 | 16.067455 |
| C  | -2.477457 | -2.009147 | -7.853380 | C | 9.132657  | 12.577486 | 14.729098 |
| H  | -3.339460 | -2.568534 | -8.201311 | C | 11.022287 | 11.853467 | 17.665106 |
| C  | -1.848906 | -1.080317 | -8.680231 | C | 10.793283 | 10.806775 | 18.577742 |
| H  | -2.232268 | -0.911877 | -9.680912 | C | 11.325622 | 10.957721 | 19.863337 |
| H  | -0.255220 | 0.365132  | -8.852335 | C | 12.041143 | 12.097810 | 20.222004 |
| C  | -0.744610 | -0.365104 | -8.216002 | C | 12.255802 | 13.112390 | 19.296247 |
| H  | 0.584541  | -0.022225 | -6.547105 | C | 11.759383 | 13.006308 | 17.992983 |
| C  | -0.267735 | -0.577022 | -6.924702 | C | 9.801837  | 9.671198  | 18.359481 |
| C  | -3.716785 | 0.934759  | -6.190782 | C | 8.358239  | 10.147608 | 18.621531 |
| C  | -2.615740 | 1.701920  | -5.752445 | C | 10.087989 | 8.506438  | 19.316238 |
| C  | -1.914505 | 2.666697  | -6.677680 | C | 12.027155 | 14.109539 | 16.979365 |
| H  | -0.829438 | 2.615593  | -6.544200 | C | 13.533908 | 14.340725 | 16.765440 |
| H  | -2.137906 | 2.456485  | -7.729331 | C | 11.307399 | 15.412472 | 17.373947 |
| H  | -2.227357 | 3.696832  | -6.466935 | C | 10.463417 | 11.833672 | 12.753563 |
| C  | -2.188556 | 1.569853  | -4.428287 | C | 10.054579 | 10.715243 | 11.999062 |
| H  | -1.333882 | 2.151539  | -4.088981 | C | 10.345511 | 10.740637 | 10.628667 |
| B  | -4.189548 | 1.036807  | -7.624849 | C | 11.008313 | 11.815208 | 10.042113 |
| O  | -4.595050 | 1.121448  | -8.777154 | C | 11.365586 | 12.919610 | 10.804745 |
| a  |           |           |           | C | 11.089644 | 12.957773 | 12.174667 |
| Si | 12.742020 | 9.296395  | 15.751194 | C | 9.326242  | 9.516623  | 12.616108 |
| Si | 15.153545 | 9.353890  | 15.233981 | C | 8.037878  | 9.897465  | 13.386592 |
| Si | 16.055636 | 10.416057 | 17.170573 | C | 8.943669  | 8.468313  | 11.558994 |
| Si | 16.289612 | 7.276545  | 15.121428 | C | 11.415613 | 14.205280 | 12.982532 |
| Si | 15.604896 | 10.535458 | 13.249666 | C | 12.636482 | 14.984592 | 12.467103 |

|   |           |           |           |   |           |           |           |
|---|-----------|-----------|-----------|---|-----------|-----------|-----------|
| C | 10.218198 | 15.180982 | 12.996165 | H | 10.053126 | 9.907026  | 10.001713 |
| C | 17.019671 | 11.986518 | 16.730348 | H | 11.236901 | 11.790881 | 8.980123  |
| C | 14.626439 | 10.886471 | 18.307555 | H | 11.862618 | 13.761630 | 10.333400 |
| C | 17.201376 | 9.370185  | 18.266282 | H | 10.024033 | 9.053669  | 13.326328 |
| C | 16.080515 | 6.224231  | 13.555892 | H | 7.442380  | 10.612409 | 12.806677 |
| C | 16.473777 | 6.184512  | 16.666015 | H | 8.241510  | 10.327240 | 14.368864 |
| C | 18.172264 | 7.532385  | 15.023937 | H | 7.426226  | 9.000404  | 13.533528 |
| C | 14.684680 | 9.692549  | 11.817869 | H | 8.208388  | 8.890877  | 10.864087 |
| C | 17.448015 | 10.580668 | 12.792743 | H | 8.476851  | 7.601140  | 12.037791 |
| C | 14.968910 | 12.312852 | 13.354180 | H | 9.799122  | 8.111381  | 10.977178 |
| H | 8.676029  | 12.986430 | 16.849544 | H | 11.621004 | 13.887657 | 14.010351 |
| H | 8.347712  | 12.985513 | 14.117956 | H | 12.396453 | 15.501382 | 11.529757 |
| H | 11.195952 | 10.165310 | 20.592421 | H | 13.503973 | 14.343442 | 12.301950 |
| H | 12.454818 | 12.182385 | 21.223272 | H | 12.903080 | 15.748638 | 13.205360 |
| H | 12.842891 | 13.982893 | 19.576784 | H | 9.993894  | 15.499629 | 11.971669 |
| H | 9.876488  | 9.372790  | 17.306799 | H | 10.473770 | 16.069016 | 13.585646 |
| H | 8.073356  | 10.957900 | 17.943464 | H | 9.316304  | 14.738275 | 13.420204 |
| H | 8.252694  | 10.509765 | 19.650582 | H | 17.844537 | 11.770604 | 16.042731 |
| H | 7.652867  | 9.321036  | 18.474757 | H | 17.444158 | 12.424494 | 17.643599 |
| H | 11.109290 | 8.139112  | 19.180865 | H | 16.380754 | 12.741243 | 16.260145 |
| H | 9.406053  | 7.681444  | 19.094695 | H | 14.108707 | 9.996638  | 18.683400 |
| H | 9.944185  | 8.782129  | 20.367596 | H | 17.505383 | 9.999383  | 19.116072 |
| H | 11.616767 | 13.792222 | 16.016566 | H | 18.111342 | 9.024510  | 17.766573 |
| H | 14.018153 | 13.428967 | 16.405992 | H | 15.070530 | 5.816786  | 13.453669 |
| H | 14.033684 | 14.654995 | 17.688751 | H | 16.777899 | 5.376666  | 13.612366 |
| H | 13.684836 | 15.123670 | 16.013720 | H | 16.310243 | 6.785283  | 12.643891 |
| H | 11.476273 | 16.184418 | 16.614358 | H | 15.524507 | 6.121419  | 17.210197 |
| H | 11.672992 | 15.792335 | 18.334675 | H | 17.013333 | 6.696172  | 17.470101 |
| H | 10.228502 | 15.247311 | 17.461200 | H | 17.041145 | 5.280039  | 16.403892 |

|          |           |           |           |    |           |           |           |
|----------|-----------|-----------|-----------|----|-----------|-----------|-----------|
| H        | 18.470704 | 7.915462  | 14.042034 | Si | 15.359690 | 9.891155  | 15.320106 |
| H        | 18.673259 | 6.564363  | 15.170135 | Si | 16.472227 | 10.933299 | 17.128438 |
| H        | 18.554487 | 8.226341  | 15.779578 | Si | 15.962852 | 7.612173  | 15.274793 |
| H        | 13.598054 | 9.760567  | 11.948545 | Si | 15.769527 | 10.982444 | 13.278172 |
| H        | 14.954141 | 8.633176  | 11.739256 | N  | 12.352491 | 11.181154 | 15.311389 |
| H        | 14.942136 | 10.174256 | 10.864361 | N  | 10.345516 | 12.039576 | 14.309994 |
| H        | 17.794349 | 9.599415  | 12.447537 | N  | 10.495035 | 12.190519 | 16.502059 |
| H        | 18.073273 | 10.875481 | 13.643273 | C  | 11.185016 | 11.738597 | 15.379019 |
| H        | 17.615369 | 11.302823 | 11.981949 | C  | 9.279244  | 12.764969 | 16.117054 |
| H        | 15.074474 | 12.814498 | 12.382819 | C  | 9.182208  | 12.659034 | 14.773257 |
| H        | 15.516454 | 12.906390 | 14.093264 | C  | 11.052183 | 12.242000 | 17.826961 |
| H        | 13.909550 | 12.311297 | 13.631127 | C  | 10.858710 | 11.151121 | 18.694175 |
| H        | 10.422038 | 6.012704  | 14.876076 | C  | 11.424772 | 11.239030 | 19.971199 |
| C        | 12.831713 | 5.239822  | 13.801997 | C  | 12.149723 | 12.362927 | 20.359527 |
| H        | 11.960356 | 4.710774  | 13.411375 | C  | 12.320155 | 13.429838 | 19.481413 |
| H        | 13.664599 | 4.529738  | 13.854021 | C  | 11.771274 | 13.394128 | 18.194501 |
| H        | 13.102430 | 6.012828  | 13.070451 | C  | 10.012687 | 9.955649  | 18.282257 |
| C        | 12.550214 | 5.850258  | 15.154707 | C  | 8.539733  | 10.189897 | 18.681336 |
| C        | 13.596804 | 6.110244  | 16.048722 | C  | 10.521805 | 8.624106  | 18.851275 |
| C        | 13.359642 | 6.705549  | 17.284499 | C  | 11.993105 | 14.539726 | 17.216639 |
| C        | 12.062052 | 7.050826  | 17.661643 | C  | 13.395119 | 14.431061 | 16.585680 |
| C        | 11.009211 | 6.798402  | 16.785527 | C  | 11.777916 | 15.919944 | 17.859948 |
| C        | 11.254700 | 6.205746  | 15.546050 | C  | 10.720482 | 11.882726 | 12.931557 |
| H        | 14.613660 | 5.857461  | 15.767670 | C  | 10.735942 | 10.591480 | 12.373822 |
| H        | 14.188646 | 6.899883  | 17.958390 | C  | 11.101066 | 10.473579 | 11.028767 |
| H        | 11.872514 | 7.512750  | 18.626485 | C  | 11.436578 | 11.595042 | 10.274722 |
| H        | 9.991213  | 7.056111  | 17.065412 | C  | 11.416706 | 12.860018 | 10.853669 |
| <b>b</b> |           |           |           | C  | 11.065795 | 13.033582 | 12.197317 |
| Si       | 13.008463 | 9.731182  | 15.904221 | C  | 10.323133 | 9.367784  | 13.177560 |

|   |           |           |           |   |           |           |           |
|---|-----------|-----------|-----------|---|-----------|-----------|-----------|
| C | 8.836812  | 9.040006  | 12.928582 | H | 13.539227 | 15.212668 | 15.831198 |
| C | 11.211220 | 8.145740  | 12.898844 | H | 11.862951 | 16.702071 | 17.097350 |
| C | 11.025471 | 14.430338 | 12.805084 | H | 12.528726 | 16.127923 | 18.629756 |
| C | 12.304489 | 15.241915 | 12.533205 | H | 10.786989 | 15.993593 | 18.320754 |
| C | 9.789454  | 15.201587 | 12.296708 | H | 11.126588 | 9.491438  | 10.566309 |
| C | 16.911868 | 12.735114 | 16.736642 | H | 11.720550 | 11.480602 | 9.231979  |
| C | 15.335575 | 10.913371 | 18.644934 | H | 11.685445 | 13.726862 | 10.256526 |
| C | 18.097179 | 10.070705 | 17.591435 | H | 10.434565 | 9.606630  | 14.238914 |
| C | 14.914044 | 6.682939  | 13.995888 | H | 8.666797  | 8.794704  | 11.873753 |
| C | 15.586210 | 6.835192  | 16.965150 | H | 8.196412  | 9.890107  | 13.188433 |
| C | 17.786751 | 7.308872  | 14.854478 | H | 8.531484  | 8.180100  | 13.536075 |
| C | 14.899649 | 10.081165 | 11.856672 | H | 11.054093 | 7.747913  | 11.889571 |
| C | 17.616618 | 11.096856 | 12.857589 | H | 10.978945 | 7.351151  | 13.613309 |
| C | 15.034637 | 12.721918 | 13.352195 | H | 12.270744 | 8.396647  | 13.005274 |
| H | 8.604834  | 13.186521 | 16.843803 | H | 10.931480 | 14.324563 | 13.890509 |
| H | 8.396490  | 12.950940 | 14.096833 | H | 12.441564 | 15.430312 | 11.462711 |
| H | 11.303677 | 10.415832 | 20.667865 | H | 13.190281 | 14.723127 | 12.905743 |
| H | 12.589832 | 12.404767 | 21.352358 | H | 12.235431 | 16.213936 | 13.034240 |
| H | 12.895499 | 14.295807 | 19.795755 | H | 9.854255  | 15.356764 | 11.213768 |
| H | 10.059596 | 9.879603  | 17.189748 | H | 9.727929  | 16.182970 | 12.779877 |
| H | 8.144592  | 11.105979 | 18.231445 | H | 8.861560  | 14.658186 | 12.501820 |
| H | 8.447439  | 10.277951 | 19.770173 | H | 17.621792 | 12.799395 | 15.903816 |
| H | 7.918804  | 9.349487  | 18.350401 | H | 17.377014 | 13.205698 | 17.613392 |
| H | 11.561640 | 8.449561  | 18.559262 | H | 16.027091 | 13.320122 | 16.469558 |
| H | 9.918036  | 7.804634  | 18.450426 | H | 15.072732 | 9.887339  | 18.928722 |
| H | 10.443617 | 8.590682  | 19.944101 | H | 14.399870 | 11.448917 | 18.446034 |
| H | 11.259283 | 14.440200 | 16.409688 | H | 15.818493 | 11.390388 | 19.508227 |
| H | 13.529699 | 13.456784 | 16.107075 | H | 17.939229 | 9.027436  | 17.886598 |
| H | 14.166650 | 14.549922 | 17.355105 | H | 18.570593 | 10.592054 | 18.434564 |



|   |           |           |           |    |           |           |           |
|---|-----------|-----------|-----------|----|-----------|-----------|-----------|
| H | 18.802120 | 10.079025 | 16.751743 | C  | 10.137577 | 5.099355  | 15.071106 |
| H | 13.849193 | 6.759708  | 14.241331 | H  | 13.368053 | 4.076510  | 15.210356 |
| H | 15.179385 | 5.617571  | 13.986892 | H  | 12.996781 | 4.518989  | 17.610895 |
| H | 15.059034 | 7.075632  | 12.983531 | H  | 10.787392 | 5.339847  | 18.404722 |
| H | 14.526898 | 6.966059  | 17.215633 | H  | 8.954493  | 5.713465  | 16.762755 |
| H | 16.181844 | 7.287836  | 17.766037 | c  |           |           |           |
| H | 15.799473 | 5.757837  | 16.950755 | Si | 13.012684 | 9.454171  | 15.678420 |
| H | 18.035449 | 7.704468  | 13.862662 | Si | 15.359395 | 9.772571  | 15.149171 |
| H | 18.002132 | 6.231865  | 14.851262 | Si | 16.414611 | 10.692792 | 17.066239 |
| H | 18.452541 | 7.786290  | 15.581080 | Si | 16.159339 | 7.551095  | 14.891524 |
| H | 13.819082 | 10.038568 | 12.027345 | Si | 15.767912 | 11.015516 | 13.178035 |
| H | 15.268121 | 9.057490  | 11.727700 | N  | 12.273835 | 10.913924 | 15.138119 |
| H | 15.065123 | 10.620697 | 10.914379 | N  | 10.157471 | 11.577751 | 14.195549 |
| H | 18.065751 | 10.101590 | 12.761511 | N  | 10.377587 | 11.779812 | 16.385261 |
| H | 18.170927 | 11.638414 | 13.632485 | C  | 11.063627 | 11.369245 | 15.237359 |
| H | 17.760676 | 11.626522 | 11.906008 | C  | 9.101639  | 12.237534 | 16.040327 |
| H | 15.087365 | 13.205654 | 12.367959 | C  | 8.962840  | 12.100424 | 14.697426 |
| H | 15.550748 | 13.360483 | 14.076242 | C  | 11.025855 | 11.972531 | 17.652506 |
| H | 13.983167 | 12.648833 | 13.650018 | C  | 11.040838 | 10.916830 | 18.588322 |
| H | 9.333125  | 5.269892  | 14.358492 | C  | 11.743267 | 11.125773 | 19.783352 |
| C | 11.618008 | 4.382598  | 13.140120 | C  | 12.403079 | 12.330211 | 20.030616 |
| H | 10.719096 | 4.584003  | 12.549975 | C  | 12.354657 | 13.363367 | 19.096866 |
| H | 11.918129 | 3.343300  | 12.962215 | C  | 11.658370 | 13.210697 | 17.889426 |
| H | 12.423404 | 5.023339  | 12.761932 | C  | 10.276955 | 9.626236  | 18.334012 |
| C | 11.375668 | 4.636371  | 14.609316 | C  | 8.832032  | 9.755545  | 18.854100 |
| C | 12.396350 | 4.428795  | 15.547906 | C  | 10.960295 | 8.386129  | 18.921849 |
| C | 12.187801 | 4.678096  | 16.902990 | C  | 11.621466 | 14.344425 | 16.874280 |
| C | 10.948108 | 5.139829  | 17.349288 | C  | 12.985756 | 14.517937 | 16.188253 |
| C | 9.922969  | 5.350393  | 16.428084 | C  | 11.135804 | 15.661186 | 17.500785 |

|   |           |           |           |   |           |           |           |
|---|-----------|-----------|-----------|---|-----------|-----------|-----------|
| C | 10.511427 | 11.447352 | 12.809762 | H | 8.260797  | 8.841151  | 18.633465 |
| C | 10.607471 | 10.157199 | 12.247464 | H | 11.994048 | 8.297937  | 18.557394 |
| C | 10.986652 | 10.062155 | 10.901859 | H | 10.415371 | 7.481774  | 18.613625 |
| C | 11.253726 | 11.203923 | 10.146455 | H | 10.971949 | 8.402843  | 20.022197 |
| C | 11.144327 | 12.467154 | 10.723845 | H | 10.894778 | 14.074794 | 16.093771 |
| C | 10.780007 | 12.619180 | 12.069496 | H | 13.306200 | 13.582118 | 15.710344 |
| C | 10.250434 | 8.912722  | 13.045318 | H | 13.756935 | 14.817082 | 16.913671 |
| C | 8.766514  | 8.558567  | 12.833682 | H | 12.928726 | 15.296886 | 15.412377 |
| C | 11.156449 | 7.715701  | 12.732897 | H | 11.047019 | 16.437243 | 16.725626 |
| C | 10.648289 | 14.011938 | 12.671607 | H | 11.839159 | 16.031756 | 18.261651 |
| C | 11.854200 | 14.914959 | 12.370042 | H | 10.152686 | 15.539508 | 17.979273 |
| C | 9.343686  | 14.680421 | 12.197710 | H | 11.076879 | 9.079338  | 10.436828 |
| C | 15.597381 | 9.998279  | 18.646506 | H | 11.551767 | 11.106818 | 9.100272  |
| C | 18.279447 | 10.280863 | 17.104530 | H | 11.357779 | 13.353396 | 10.123037 |
| C | 16.224085 | 12.588792 | 17.110108 | H | 10.386874 | 9.145484  | 14.111569 |
| C | 14.975687 | 6.560628  | 13.764557 | H | 8.570573  | 8.317361  | 11.777366 |
| C | 16.226214 | 6.649919  | 16.575063 | H | 8.111273  | 9.395318  | 13.117915 |
| C | 17.901179 | 7.498248  | 14.110245 | H | 8.488354  | 7.684570  | 13.442201 |
| C | 15.105289 | 10.046120 | 11.672508 | H | 10.995050 | 7.328405  | 11.715353 |
| C | 17.625607 | 11.373714 | 12.912229 | H | 10.948899 | 6.895665  | 13.435411 |
| C | 14.821201 | 12.662774 | 13.257685 | H | 12.218466 | 7.982566  | 12.832760 |
| H | 8.413405  | 12.612115 | 16.788053 | H | 10.589893 | 13.902174 | 13.764646 |
| H | 8.120506  | 12.308899 | 14.049741 | H | 11.936549 | 15.140265 | 11.296123 |
| H | 11.789159 | 10.329137 | 20.526980 | H | 12.793620 | 14.450432 | 12.695811 |
| H | 12.959416 | 12.462537 | 20.960947 | H | 11.742161 | 15.873891 | 12.898195 |
| H | 12.873436 | 14.301643 | 19.303118 | H | 9.358624  | 14.827253 | 11.106785 |
| H | 10.231728 | 9.484159  | 17.242647 | H | 9.220669  | 15.665724 | 12.672532 |
| H | 8.309365  | 10.603783 | 18.389349 | H | 8.461362  | 14.070966 | 12.440448 |
| H | 8.824470  | 9.909380  | 19.944414 | H | 14.542152 | 10.305995 | 18.703237 |

|   |           |           |           |          |           |           |           |
|---|-----------|-----------|-----------|----------|-----------|-----------|-----------|
| H | 16.111737 | 10.379472 | 19.543599 | H        | 9.915949  | 16.165586 | 21.670160 |
| H | 15.634283 | 8.899684  | 18.668718 | H        | 11.082070 | 14.814167 | 21.780329 |
| H | 18.783005 | 10.663615 | 16.204408 | C        | 9.032143  | 14.204854 | 21.572146 |
| H | 18.449078 | 9.195312  | 17.151271 | C        | 8.459453  | 14.381358 | 20.312370 |
| H | 18.753640 | 10.740199 | 17.986930 | C        | 7.505717  | 13.490061 | 19.830893 |
| H | 16.669021 | 13.063573 | 16.223492 | C        | 7.109859  | 12.404842 | 20.607159 |
| H | 16.718701 | 12.997934 | 18.005863 | C        | 7.677832  | 12.216462 | 21.863707 |
| H | 15.161135 | 12.862845 | 17.148587 | C        | 8.631107  | 13.111172 | 22.339736 |
| H | 13.970334 | 6.509270  | 14.209494 | H        | 8.767850  | 15.235991 | 19.699591 |
| H | 15.344485 | 5.531482  | 13.627209 | H        | 7.063555  | 13.647258 | 18.842293 |
| H | 14.882416 | 7.027379  | 12.772892 | H        | 6.354209  | 11.707289 | 20.234108 |
| H | 15.241405 | 6.666605  | 17.065558 | H        | 7.371716  | 11.366958 | 22.481918 |
| H | 16.952511 | 7.119454  | 17.254595 | <b>d</b> |           |           |           |
| H | 16.522161 | 5.598192  | 16.432586 | Si       | 13.202959 | 9.397147  | 15.865415 |
| H | 17.886967 | 7.919507  | 13.094112 | Si       | 15.451952 | 9.801441  | 15.081518 |
| H | 18.260989 | 6.458797  | 14.044336 | Si       | 16.652163 | 10.754650 | 16.873838 |
| H | 18.622816 | 8.076034  | 14.706071 | Si       | 16.282361 | 7.621706  | 14.729338 |
| H | 14.024125 | 9.869739  | 11.776480 | Si       | 15.620944 | 11.066769 | 13.108241 |
| H | 15.606825 | 9.073514  | 11.562094 | N        | 12.381685 | 10.836470 | 15.534606 |
| H | 15.267240 | 10.622347 | 10.747364 | N        | 10.209663 | 11.564891 | 14.796796 |
| H | 18.208589 | 10.443298 | 12.853553 | N        | 10.690592 | 11.852987 | 16.929513 |
| H | 18.028145 | 11.971858 | 13.743448 | C        | 11.212234 | 11.351704 | 15.739286 |
| H | 17.779571 | 11.938232 | 11.978227 | C        | 9.400806  | 12.351814 | 16.713473 |
| H | 14.887231 | 13.192843 | 12.294346 | C        | 9.104516  | 12.169126 | 15.409481 |
| H | 15.214813 | 13.319821 | 14.046307 | C        | 11.458481 | 11.965251 | 18.139562 |
| H | 13.765770 | 12.451884 | 13.482497 | C        | 11.579423 | 10.838817 | 18.973891 |
| H | 9.075258  | 12.961264 | 23.330323 | C        | 12.389178 | 10.963825 | 20.108833 |
| C | 10.071017 | 15.151816 | 22.077477 | C        | 13.042404 | 12.159825 | 20.394876 |
| H | 10.043656 | 15.220594 | 23.178479 | C        | 12.882406 | 13.266558 | 19.565601 |

|   |           |           |           |   |           |           |           |
|---|-----------|-----------|-----------|---|-----------|-----------|-----------|
| C | 12.082403 | 13.196234 | 18.420143 | H | 8.209660  | 12.393397 | 14.854223 |
| C | 10.806856 | 9.559800  | 18.682549 | H | 12.518239 | 10.115023 | 20.772358 |
| C | 9.361635  | 9.686025  | 19.207381 | H | 13.676731 | 12.230865 | 21.274454 |
| C | 11.477663 | 8.298025  | 19.241872 | H | 13.386756 | 14.195368 | 19.812737 |
| C | 11.898519 | 14.399942 | 17.503896 | H | 10.758459 | 9.444418  | 17.593498 |
| C | 12.912342 | 14.377755 | 16.341846 | H | 8.847195  | 10.539122 | 18.756870 |
| C | 11.978703 | 15.741542 | 18.249824 | H | 9.360358  | 9.823412  | 20.295149 |
| C | 10.410220 | 11.385991 | 13.384837 | H | 8.792307  | 8.779153  | 18.974252 |
| C | 10.447464 | 10.076716 | 12.868143 | H | 12.513559 | 8.218220  | 18.897990 |
| C | 10.703761 | 9.928202  | 11.501836 | H | 10.936151 | 7.412325  | 18.893554 |
| C | 10.895672 | 11.039060 | 10.682642 | H | 11.465210 | 8.282954  | 20.337816 |
| C | 10.827493 | 12.322076 | 11.214419 | H | 10.895051 | 14.327574 | 17.068680 |
| C | 10.592379 | 12.526782 | 12.579586 | H | 12.903455 | 13.421826 | 15.812872 |
| C | 10.145259 | 8.875977  | 13.753649 | H | 13.925922 | 14.543111 | 16.722970 |
| C | 8.618562  | 8.680255  | 13.867487 | H | 12.685209 | 15.175790 | 15.627050 |
| C | 10.831834 | 7.583929  | 13.289111 | H | 11.672133 | 16.552961 | 17.581226 |
| C | 10.488599 | 13.941902 | 13.134698 | H | 13.000620 | 15.958080 | 18.580150 |
| C | 11.618157 | 14.869544 | 12.654879 | H | 11.327721 | 15.754186 | 19.129620 |
| C | 9.118177  | 14.552948 | 12.771708 | H | 10.753073 | 8.933471  | 11.070060 |
| C | 16.001084 | 10.076426 | 18.520288 | H | 11.098406 | 10.901209 | 9.623872  |
| C | 18.508295 | 10.383080 | 16.755973 | H | 10.972154 | 13.179873 | 10.564033 |
| C | 16.425811 | 12.633435 | 16.909721 | H | 10.525127 | 9.094657  | 14.757122 |
| C | 15.038029 | 6.613482  | 13.711222 | H | 8.183922  | 8.464839  | 12.884342 |
| C | 16.511981 | 6.722095  | 16.383931 | H | 8.135576  | 9.577979  | 14.266773 |
| C | 17.937739 | 7.619620  | 13.804228 | H | 8.391726  | 7.842330  | 14.536376 |
| C | 14.916688 | 10.075976 | 11.652796 | H | 10.414117 | 7.215439  | 12.345373 |
| C | 17.413260 | 11.541234 | 12.704376 | H | 10.690617 | 6.802159  | 14.042358 |
| C | 14.594143 | 12.643473 | 13.267521 | H | 11.908256 | 7.733463  | 13.154929 |
| H | 8.821248  | 12.775027 | 17.516477 | H | 10.552462 | 13.884774 | 14.225937 |

|   |           |           |           |    |           |           |           |
|---|-----------|-----------|-----------|----|-----------|-----------|-----------|
| H | 11.579182 | 15.024883 | 11.571272 | H  | 17.459594 | 12.119547 | 11.771589 |
| H | 12.599879 | 14.465192 | 12.909200 | H  | 14.594542 | 13.197417 | 12.319753 |
| H | 11.513698 | 15.850442 | 13.131995 | H  | 14.975062 | 13.304678 | 14.053229 |
| H | 9.025604  | 14.661232 | 11.684933 | H  | 13.561287 | 12.381817 | 13.520551 |
| H | 9.010742  | 15.544563 | 13.225711 | H  | 7.276076  | 11.863085 | 20.435709 |
| H | 8.290928  | 13.924951 | 13.116449 | C  | 9.349614  | 13.536062 | 21.028145 |
| H | 14.950514 | 10.352954 | 18.667712 | H  | 8.946662  | 13.091957 | 21.943900 |
| H | 16.576561 | 10.490204 | 19.359486 | H  | 9.825471  | 14.487665 | 21.283033 |
| H | 16.072082 | 8.984200  | 18.566310 | H  | 10.132230 | 12.866276 | 20.651481 |
| H | 18.926975 | 10.761963 | 15.816357 | C  | 8.269194  | 13.723307 | 19.991136 |
| H | 18.705234 | 9.305951  | 16.799104 | C  | 8.242204  | 14.855898 | 19.166241 |
| H | 19.048610 | 10.858782 | 17.585628 | C  | 7.272903  | 15.002408 | 18.171654 |
| H | 16.802301 | 13.108526 | 15.996693 | C  | 6.304644  | 14.014699 | 17.985507 |
| H | 16.960621 | 13.067160 | 17.765259 | C  | 6.309808  | 12.886412 | 18.809211 |
| H | 15.365259 | 12.883730 | 17.010421 | C  | 7.280340  | 12.746301 | 19.801655 |
| H | 14.082069 | 6.528077  | 14.242057 | H  | 8.991851  | 15.631313 | 19.301005 |
| H | 15.416966 | 5.598601  | 13.531096 | H  | 7.277696  | 15.887334 | 17.540864 |
| H | 14.839005 | 7.078302  | 12.739015 | H  | 5.551482  | 14.124112 | 17.210205 |
| H | 15.570371 | 6.696995  | 16.945259 | H  | 5.558024  | 12.112809 | 18.677255 |
| H | 17.263644 | 7.212738  | 17.012800 | e  |           |           |           |
| H | 16.835642 | 5.685740  | 16.218694 | Si | 13.202959 | 9.397147  | 15.865415 |
| H | 17.828451 | 8.050660  | 12.802131 | Si | 15.451952 | 9.801441  | 15.081518 |
| H | 18.315102 | 6.594514  | 13.690918 | Si | 16.652163 | 10.754650 | 16.873838 |
| H | 18.695887 | 8.204003  | 14.337574 | Si | 16.282361 | 7.621706  | 14.729338 |
| H | 13.874174 | 9.794964  | 11.841264 | Si | 15.620944 | 11.066769 | 13.108241 |
| H | 15.489403 | 9.159774  | 11.467429 | N  | 12.381685 | 10.836470 | 15.534606 |
| H | 14.940640 | 10.678855 | 10.735023 | N  | 10.209663 | 11.564891 | 14.796796 |
| H | 18.046755 | 10.654947 | 12.586448 | N  | 10.690592 | 11.852987 | 16.929513 |
| H | 17.846172 | 12.155728 | 13.502913 | C  | 11.212234 | 11.351704 | 15.739286 |

|   |           |           |           |   |           |           |           |
|---|-----------|-----------|-----------|---|-----------|-----------|-----------|
| C | 9.400806  | 12.351814 | 16.713473 | C | 15.038029 | 6.613482  | 13.711222 |
| C | 9.104516  | 12.169126 | 15.409481 | C | 16.511981 | 6.722095  | 16.383931 |
| C | 11.458481 | 11.965251 | 18.139562 | C | 17.937739 | 7.619620  | 13.804228 |
| C | 11.579423 | 10.838817 | 18.973891 | C | 14.916688 | 10.075976 | 11.652796 |
| C | 12.389178 | 10.963825 | 20.108833 | C | 17.413260 | 11.541234 | 12.704376 |
| C | 13.042404 | 12.159825 | 20.394876 | C | 14.594143 | 12.643473 | 13.267521 |
| C | 12.882406 | 13.266558 | 19.565601 | H | 8.821248  | 12.775027 | 17.516477 |
| C | 12.082403 | 13.196234 | 18.420143 | H | 8.209660  | 12.393397 | 14.854223 |
| C | 10.806856 | 9.559800  | 18.682549 | H | 12.518239 | 10.115023 | 20.772358 |
| C | 9.265653  | 9.626532  | 18.699480 | H | 13.676731 | 12.230865 | 21.274454 |
| C | 11.477663 | 8.298025  | 19.241872 | H | 13.386756 | 14.195368 | 19.812737 |
| C | 11.898519 | 14.399942 | 17.503896 | H | 10.758459 | 9.444418  | 17.593498 |
| C | 12.912342 | 14.377755 | 16.341846 | H | 8.895867  | 10.453315 | 18.087050 |
| C | 11.978703 | 15.741542 | 18.249824 | H | 8.900289  | 9.771156  | 19.723056 |
| C | 10.410220 | 11.385991 | 13.384837 | H | 8.840802  | 8.694151  | 18.310807 |
| C | 10.447464 | 10.076716 | 12.868143 | H | 12.513559 | 8.218220  | 18.897990 |
| C | 10.703761 | 9.928202  | 11.501836 | H | 10.936151 | 7.412325  | 18.893554 |
| C | 10.895672 | 11.039060 | 10.682642 | H | 11.465210 | 8.282954  | 20.337816 |
| C | 10.827493 | 12.322076 | 11.214419 | H | 10.895051 | 14.327574 | 17.068680 |
| C | 10.592379 | 12.526782 | 12.579586 | H | 12.903455 | 13.421826 | 15.812872 |
| C | 10.145259 | 8.875977  | 13.753649 | H | 13.925922 | 14.543111 | 16.722970 |
| C | 8.618562  | 8.680255  | 13.867487 | H | 12.685209 | 15.175790 | 15.627050 |
| C | 10.831834 | 7.583929  | 13.289111 | H | 11.672133 | 16.552961 | 17.581226 |
| C | 10.488599 | 13.941902 | 13.134698 | H | 13.000620 | 15.958080 | 18.580150 |
| C | 11.618157 | 14.869544 | 12.654879 | H | 11.327721 | 15.754186 | 19.129620 |
| C | 9.118177  | 14.552948 | 12.771708 | H | 10.753073 | 8.933471  | 11.070060 |
| C | 16.001084 | 10.076426 | 18.520288 | H | 11.098406 | 10.901209 | 9.623872  |
| C | 18.508295 | 10.383080 | 16.755973 | H | 10.972154 | 13.179873 | 10.564033 |
| C | 16.425811 | 12.633435 | 16.909721 | H | 10.525127 | 9.094657  | 14.757122 |

|   |           |           |           |              |           |           |           |
|---|-----------|-----------|-----------|--------------|-----------|-----------|-----------|
| H | 8.183922  | 8.464839  | 12.884342 | H            | 18.315102 | 6.594514  | 13.690918 |
| H | 8.135576  | 9.577979  | 14.266773 | H            | 18.695887 | 8.204003  | 14.337574 |
| H | 8.391726  | 7.842330  | 14.536376 | H            | 13.874174 | 9.794964  | 11.841264 |
| H | 10.414117 | 7.215439  | 12.345373 | H            | 15.489403 | 9.159774  | 11.467429 |
| H | 10.690617 | 6.802159  | 14.042358 | H            | 14.940640 | 10.678855 | 10.735023 |
| H | 11.908256 | 7.733463  | 13.154929 | H            | 18.046755 | 10.654947 | 12.586448 |
| H | 10.552462 | 13.884774 | 14.225937 | H            | 17.846172 | 12.155728 | 13.502913 |
| H | 11.579182 | 15.024883 | 11.571272 | H            | 17.459594 | 12.119547 | 11.771589 |
| H | 12.599879 | 14.465192 | 12.909200 | H            | 14.594542 | 13.197417 | 12.319753 |
| H | 11.513698 | 15.850442 | 13.131995 | H            | 14.975062 | 13.304678 | 14.053229 |
| H | 9.025604  | 14.661232 | 11.684933 | H            | 13.561287 | 12.381817 | 13.520551 |
| H | 9.010742  | 15.544563 | 13.225711 | H            | 8.132003  | 9.439949  | 22.320501 |
| H | 8.290928  | 13.924951 | 13.116449 | C            | 8.593294  | 12.127979 | 22.215176 |
| H | 14.950514 | 10.352954 | 18.667712 | H            | 8.362918  | 11.822290 | 23.240694 |
| H | 16.576561 | 10.490204 | 19.359486 | H            | 8.331358  | 13.183912 | 22.099625 |
| H | 16.072082 | 8.984200  | 18.566310 | H            | 9.678064  | 12.040314 | 22.078925 |
| H | 18.926975 | 10.761963 | 15.816357 | C            | 7.862872  | 11.268583 | 21.212341 |
| H | 18.705234 | 9.305951  | 16.799104 | C            | 7.327440  | 11.816769 | 20.038992 |
| H | 19.048610 | 10.858782 | 17.585628 | C            | 6.698381  | 11.011682 | 19.086977 |
| H | 16.802301 | 13.108526 | 15.996693 | C            | 6.589170  | 9.635880  | 19.294301 |
| H | 16.960621 | 13.067160 | 17.765259 | C            | 7.105454  | 9.076480  | 20.465655 |
| H | 15.365259 | 12.883730 | 17.010421 | C            | 7.732034  | 9.886282  | 21.413350 |
| H | 14.082069 | 6.528077  | 14.242057 | H            | 7.407448  | 12.886838 | 19.865922 |
| H | 15.416966 | 5.598601  | 13.531096 | H            | 6.297110  | 11.460527 | 18.182248 |
| H | 14.839005 | 7.078302  | 12.739015 | H            | 6.103572  | 9.006433  | 18.553822 |
| H | 15.570371 | 6.696995  | 16.945259 | H            | 7.022128  | 8.007160  | 20.640764 |
| H | 17.263644 | 7.212738  | 17.012800 | <b>Int_a</b> |           |           |           |
| H | 16.835642 | 5.685740  | 16.218694 | C            | 4.156797  | 19.957216 | 9.726710  |
| H | 17.828451 | 8.050660  | 12.802131 | C            | 5.414982  | 19.415576 | 10.044630 |

|    |          |           |           |    |           |           |           |
|----|----------|-----------|-----------|----|-----------|-----------|-----------|
| C  | 6.619284 | 20.125548 | 9.895023  | Br | 5.990276  | 17.648203 | 16.030337 |
| C  | 6.536812 | 21.417108 | 9.362850  | C  | 2.539965  | 16.284888 | 14.209755 |
| C  | 5.309038 | 21.968125 | 9.004103  | C  | 8.765994  | 14.968595 | 11.599725 |
| C  | 4.131037 | 21.250150 | 9.193231  | H  | 5.413302  | 14.788231 | 10.341158 |
| N  | 5.471853 | 18.059199 | 10.525804 | H  | 5.178433  | 16.988540 | 8.669735  |
| C  | 5.666684 | 17.701507 | 11.847518 | H  | 8.166418  | 14.091067 | 14.990480 |
| N  | 5.675039 | 16.320245 | 11.843818 | H  | 6.144270  | 13.172133 | 16.057646 |
| C  | 5.456270 | 15.844830 | 10.547235 | H  | 3.900031  | 13.786149 | 15.230683 |
| C  | 5.334685 | 16.917414 | 9.733761  | H  | 8.053411  | 16.797557 | 12.469394 |
| C  | 5.804146 | 15.494402 | 13.013920 | H  | 7.969379  | 14.904135 | 10.852072 |
| C  | 7.095616 | 15.198967 | 13.487880 | H  | 9.035419  | 13.950870 | 11.904148 |
| C  | 7.190594 | 14.344866 | 14.589785 | H  | 9.639666  | 15.429459 | 11.125297 |
| C  | 6.046826 | 13.829566 | 15.197883 | H  | 9.193844  | 16.508557 | 14.702197 |
| C  | 4.783125 | 14.170855 | 14.727700 | H  | 10.297293 | 16.554418 | 13.315891 |
| C  | 4.633475 | 15.017438 | 13.622709 | H  | 9.932904  | 15.009481 | 14.093929 |
| C  | 8.329846 | 15.797953 | 12.825709 | H  | 3.364555  | 16.045850 | 12.249439 |
| C  | 9.504543 | 15.974458 | 13.799573 | H  | 3.133456  | 17.171428 | 14.451795 |
| C  | 3.248273 | 15.426246 | 13.144123 | H  | 2.387602  | 15.716196 | 15.133836 |
| C  | 2.398054 | 14.203901 | 12.752348 | H  | 1.560555  | 16.610954 | 13.842793 |
| N  | 5.777769 | 18.524130 | 12.834097 | H  | 1.421809  | 14.528324 | 12.375400 |
| Si | 6.230772 | 19.060969 | 14.295675 | H  | 2.224867  | 13.547812 | 13.612680 |
| Br | 8.400060 | 19.680811 | 14.312719 | H  | 2.891731  | 13.615041 | 11.971737 |
| C  | 7.956467 | 19.508692 | 10.289712 | H  | 7.441580  | 22.000778 | 9.228870  |
| C  | 9.025697 | 20.555925 | 10.634914 | H  | 5.268788  | 22.971099 | 8.587203  |
| C  | 2.875106 | 19.184146 | 10.011386 | H  | 3.181512  | 21.703336 | 8.927108  |
| C  | 1.685928 | 19.619573 | 9.142988  | H  | 7.784825  | 18.921170 | 11.198368 |
| C  | 8.479141 | 18.552922 | 9.198901  | H  | 8.670020  | 19.102299 | 8.269678  |
| C  | 2.509236 | 19.300634 | 11.508059 | H  | 7.763131  | 17.757258 | 8.980592  |
| Br | 5.025578 | 20.879071 | 14.822230 | H  | 9.418629  | 18.091088 | 9.523665  |



H 9.349339 21.111919 9.747352  
H 9.905822 20.053657 11.049032  
H 8.660900 21.268107 11.381042  
H 3.069029 18.125776 9.797732  
H 2.266721 20.340019 11.755819  
H 3.335531 18.992191 12.153467  
H 1.635561 18.678420 11.733861  
H 1.344917 20.627064 9.406077  
H 0.844725 18.937105 9.303562  
H 1.934280 19.608969 8.077484  
H 3.850148 19.299152 6.587725  
C 2.322408 17.040460 6.368841  
H 1.845671 17.943613 5.977957  
H 1.971428 16.895052 7.398626  
H 1.977872 16.187089 5.776710  
C 3.826100 17.160405 6.325294  
C 4.633186 16.026553 6.160138  
C 6.024422 16.132028 6.132557  
C 6.634643 17.379193 6.275799  
C 5.843334 18.515055 6.447345  
C 4.453523 18.404258 6.466869  
H 4.164407 15.051879 6.041379  
H 6.631674 15.240592 5.998476  
H 7.716928 17.463780 6.255756  
H 6.304995 19.490964 6.568137  
H 5.472629 16.750123 2.745029  
C 6.781641 19.133995 2.975063  
H 7.321613 18.272537 3.378939  
H 7.032057 20.010401 3.581197

H 7.153727 19.316285 1.958547  
C 5.292651 18.883929 2.966120  
C 4.383687 19.942092 3.093850  
C 3.007169 19.714655 3.072413  
C 2.513527 18.417439 2.922673  
C 3.408693 17.354112 2.799039  
C 4.783502 17.587982 2.820685  
H 4.759607 20.955138 3.221567  
H 2.319881 20.550372 3.177217  
H 1.442178 18.235825 2.913436  
H 3.036246 16.337868 2.699792

**Ts\_b**

C 3.895618 20.125433 9.918475  
C 5.123641 19.457124 10.077399  
C 6.365536 20.063093 9.818945  
C 6.354084 21.389071 9.373298  
C 5.154551 22.070490 9.188204  
C 3.939260 21.444957 9.456699  
N 5.113134 18.093527 10.538012  
C 5.472739 17.711242 11.825958  
N 5.343043 16.330346 11.825958  
C 4.906834 15.889518 10.575207  
C 4.768487 16.975810 9.780814  
C 5.618872 15.478954 12.952785  
C 6.960119 15.180991 13.257507  
C 7.194677 14.302847 14.319104  
C 6.137840 13.752165 15.042585  
C 4.824533 14.094467 14.739456  
C 4.536589 14.981425 13.695171

|    |          |           |           |   |           |           |           |
|----|----------|-----------|-----------|---|-----------|-----------|-----------|
| C  | 8.101924 | 15.793763 | 12.457034 | C | 2.748673  | 23.501899 | 15.327558 |
| C  | 9.402025 | 15.922460 | 13.264057 | C | 3.309840  | 24.187403 | 18.256020 |
| C  | 3.102518 | 15.399524 | 13.405977 | H | 4.751759  | 14.842798 | 10.373090 |
| C  | 2.333394 | 14.284504 | 12.669820 | H | 4.468782  | 17.064512 | 8.750236  |
| N  | 5.880212 | 18.475200 | 12.768170 | H | 8.214212  | 14.049371 | 14.590983 |
| Si | 6.146497 | 19.351699 | 14.114619 | H | 6.343503  | 13.067791 | 15.861429 |
| Br | 8.441468 | 19.702655 | 14.264197 | H | 4.012050  | 13.684965 | 15.332701 |
| C  | 7.666108 | 19.289825 | 9.986448  | H | 7.795813  | 16.810109 | 12.187903 |
| C  | 8.863071 | 20.184364 | 10.339227 | H | 7.453325  | 14.980697 | 10.525913 |
| C  | 2.583118 | 19.451610 | 10.297283 | H | 8.649661  | 13.979718 | 11.374126 |
| C  | 1.347942 | 20.071598 | 9.627661  | H | 9.151506  | 15.483914 | 10.572874 |
| C  | 7.962537 | 18.448139 | 8.728028  | H | 9.227692  | 16.434891 | 14.215051 |
| C  | 2.405601 | 19.467578 | 11.829147 | H | 10.131491 | 16.504652 | 12.691124 |
| Br | 5.461116 | 21.467037 | 13.343521 | H | 9.850588  | 14.943829 | 13.470868 |
| Br | 5.841148 | 17.826980 | 15.811457 | H | 3.136226  | 16.274163 | 12.747766 |
| C  | 2.362957 | 15.817276 | 14.689879 | H | 2.936074  | 16.561846 | 15.247060 |
| C  | 8.350077 | 15.010533 | 11.151696 | H | 2.184772  | 14.959016 | 15.347302 |
| Si | 4.810946 | 21.122448 | 16.962738 | H | 1.389238  | 16.249301 | 14.434684 |
| Si | 4.044141 | 23.350897 | 16.711468 | H | 1.310333  | 14.609489 | 12.448688 |
| C  | 5.430859 | 24.564672 | 16.166770 | H | 2.279849  | 13.381913 | 13.289153 |
| Si | 2.762723 | 19.963485 | 17.088404 | H | 2.820097  | 14.019025 | 11.725579 |
| C  | 1.355730 | 20.921148 | 17.946730 | H | 7.292363  | 21.893415 | 9.166213  |
| K  | 7.662943 | 22.354062 | 15.982220 | H | 5.165868  | 23.098649 | 8.836107  |
| Si | 5.584677 | 21.009309 | 19.183667 | H | 3.014762  | 21.995657 | 9.316721  |
| C  | 4.303167 | 21.262630 | 20.568735 | H | 7.530464  | 18.603058 | 10.826533 |
| C  | 2.148082 | 19.563343 | 15.339519 | H | 8.142588  | 19.100814 | 7.866555  |
| C  | 2.865008 | 18.330032 | 18.056623 | H | 7.126256  | 17.785804 | 8.484741  |
| C  | 6.948261 | 22.314395 | 19.512412 | H | 8.854473  | 17.831271 | 8.885557  |
| C  | 6.399495 | 19.323345 | 19.509616 | H | 9.151291  | 20.828753 | 9.500903  |

|   |          |           |           |   |          |           |           |
|---|----------|-----------|-----------|---|----------|-----------|-----------|
| H | 9.727035 | 19.558044 | 10.586277 | H | 3.124706 | 23.071263 | 14.392973 |
| H | 8.639812 | 20.812940 | 11.206108 | H | 3.810780 | 22.237641 | 20.490690 |
| H | 2.642148 | 18.404782 | 9.976018  | H | 7.867357 | 22.101863 | 18.946355 |
| H | 2.312441 | 20.497036 | 12.189340 | H | 4.785017 | 21.199321 | 21.554663 |
| H | 3.260814 | 19.022347 | 12.341235 | H | 1.819961 | 22.980424 | 15.582860 |
| H | 1.503839 | 18.916731 | 12.117873 | H | 6.617558 | 23.330912 | 19.264370 |
| H | 1.150932 | 21.081033 | 10.006232 | H | 7.232734 | 22.311047 | 20.573132 |
| H | 0.467269 | 19.461096 | 9.852418  | H | 2.253110 | 21.784168 | 3.356622  |
| H | 1.453071 | 20.130721 | 8.539760  | C | 0.949342 | 19.596909 | 4.340777  |
| H | 1.898438 | 17.811145 | 17.997608 | H | 0.116597 | 19.912255 | 3.700334  |
| H | 0.449937 | 20.298668 | 17.973212 | H | 0.969176 | 20.271457 | 5.204747  |
| H | 3.082598 | 18.510907 | 19.115862 | H | 0.737980 | 18.587778 | 4.704074  |
| H | 1.620135 | 21.176120 | 18.978699 | C | 2.257179 | 19.640080 | 3.586333  |
| H | 3.635117 | 17.660680 | 17.663464 | C | 2.970383 | 18.468640 | 3.309019  |
| H | 1.205799 | 18.999597 | 15.360493 | C | 4.175352 | 18.509671 | 2.605384  |
| H | 1.103548 | 21.851903 | 17.427059 | C | 4.689478 | 19.729250 | 2.164804  |
| H | 4.059152 | 24.277813 | 19.051704 | C | 3.990600 | 20.907791 | 2.439099  |
| H | 2.887066 | 18.965771 | 14.795670 | C | 2.788264 | 20.860684 | 3.144323  |
| H | 1.985263 | 20.482418 | 14.766318 | H | 2.590343 | 17.515801 | 3.669473  |
| H | 5.013188 | 25.575605 | 16.072591 | H | 4.717027 | 17.587464 | 2.412787  |
| H | 2.465142 | 23.618918 | 18.657179 | H | 5.628772 | 19.764134 | 1.619547  |
| H | 2.957786 | 25.198930 | 18.009307 | H | 4.384865 | 21.864730 | 2.106847  |
| H | 5.675547 | 18.508799 | 19.395221 | H | 2.990595 | 19.527810 | 7.003535  |
| H | 5.839353 | 24.304533 | 15.179960 | C | 5.508756 | 19.493381 | 6.022095  |
| H | 7.212287 | 19.133117 | 18.798780 | H | 5.126720 | 20.064953 | 5.167971  |
| H | 6.250537 | 24.638541 | 16.897145 | H | 6.527725 | 19.174093 | 5.786805  |
| H | 3.523666 | 20.493404 | 20.526531 | H | 5.546135 | 20.163296 | 6.887632  |
| H | 6.810210 | 19.274916 | 20.527468 | C | 4.612388 | 18.313222 | 6.294078  |
| H | 2.503787 | 24.557534 | 15.147029 | C | 5.021855 | 17.000706 | 6.032600  |

C 4.160449 15.921485 6.247158  
C 2.869537 16.139019 6.731392  
C 2.451707 17.444218 7.005481  
C 3.317367 18.514321 6.789915  
H 6.025201 16.821804 5.652546  
H 4.500160 14.910301 6.038944  
H 2.199080 15.301435 6.902649  
H 1.452812 17.626347 7.392654

**Int\_c**

C 4.148642 15.723249 15.597554  
C 4.162565 14.365456 15.944854  
C 2.941198 13.738365 16.215410  
C 1.738970 14.441279 16.132471  
C 1.736811 15.788112 15.767017  
C 2.949479 16.428820 15.502128  
C 5.460478 13.597709 15.995368  
C 2.899507 13.871196 12.735008  
C 3.356914 12.604999 12.656898  
N 3.380742 12.248349 11.305086  
C 2.950677 13.308924 10.517900  
N 2.649331 14.307660 11.435135  
C 3.706055 10.920272 10.856428  
C 2.650660 10.053783 10.508924  
C 2.990701 8.746078 10.153764  
C 4.319104 8.321745 10.159997  
C 5.337800 9.202791 10.502853  
C 5.053921 10.529506 10.847998  
C 1.200619 10.522900 10.544366

C 0.274348 9.712046 9.626641  
C 6.177722 11.495922 11.193144  
C 6.768199 11.179190 12.582096  
C 2.019992 15.575777 11.170716  
C 0.621666 15.649257 11.285429  
C 0.030772 16.912280 11.170175  
C 0.806300 18.044302 10.940523  
C 2.187690 17.934902 10.798380  
C 2.826904 16.695794 10.906495  
N 2.788458 13.379122 9.230251  
Si 3.605352 13.163272 7.800574  
Si 2.434398 13.739374 5.859789  
Si 0.522776 12.347212 5.761609  
C -0.409922 12.692752 4.148265  
C -0.226730 14.412674 11.543780  
C -0.672276 14.345677 13.017639  
C 4.334124 16.559638 10.758746  
C 5.039541 16.676950 12.124599  
C 7.282154 11.497022 10.120374  
C -1.440165 14.336475 10.601596  
C 4.926779 17.561879 9.757736  
Br 5.583699 14.353224 7.936297  
C 0.646768 10.511780 11.985623  
Si 3.816268 13.348680 3.971244  
C 5.617416 13.817957 4.284684  
Si 1.846822 16.026556 6.007409  
C 3.411627 17.077318 5.838769  
C 3.750526 11.538677 3.428066  
C 3.162987 14.406047 2.538732

|    |           |           |           |   |           |           |           |
|----|-----------|-----------|-----------|---|-----------|-----------|-----------|
| C  | 1.011125  | 16.374746 | 7.659421  | H | 0.330076  | 19.017656 | 10.853999 |
| C  | 0.641563  | 16.516218 | 4.629152  | H | 4.852030  | 17.660176 | 12.572760 |
| C  | 0.964259  | 10.510047 | 5.784373  | H | 4.558881  | 7.298677  | 9.882578  |
| C  | -0.607752 | 12.718825 | 7.229912  | H | 6.121534  | 16.555076 | 12.000727 |
| Br | 4.386096  | 11.031062 | 7.373005  | H | 0.209987  | 12.455431 | 3.275751  |
| H  | -1.257274 | 13.436312 | 13.196085 | H | 4.532304  | 15.556762 | 10.366079 |
| H  | 0.189239  | 14.338688 | 13.690997 | H | -0.051940 | 12.650996 | 8.170601  |
| H  | 7.549089  | 11.903975 | 12.838837 | H | 3.185028  | 18.133995 | 6.031966  |
| H  | 6.000008  | 11.211591 | 13.361767 | H | -0.715469 | 13.740952 | 4.066593  |
| H  | -1.296174 | 15.211015 | 13.270322 | H | 0.030672  | 15.888813 | 7.710257  |
| H  | 7.214692  | 10.178133 | 12.591224 | H | 2.775191  | 18.824208 | 10.593348 |
| H  | 2.722290  | 14.513433 | 13.580742 | H | 1.605361  | 16.000256 | 8.497163  |
| H  | 3.657996  | 11.911183 | 13.423289 | H | 3.831604  | 17.001059 | 4.828979  |
| H  | -1.131475 | 14.422665 | 9.557180  | H | -1.312880 | 12.070141 | 4.097014  |
| H  | 0.395639  | 13.534835 | 11.346172 | H | 2.211552  | 8.047056  | 9.867987  |
| H  | -1.952007 | 13.376257 | 10.729986 | H | 0.665609  | 9.657323  | 8.607670  |
| H  | 8.020959  | 12.272381 | 10.350063 | H | 1.187104  | 11.556654 | 10.181025 |
| H  | 5.753785  | 12.504928 | 11.227542 | H | 4.183555  | 16.754442 | 6.545009  |
| H  | 6.369875  | 8.864588  | 10.484745 | H | 4.893603  | 18.587623 | 10.142745 |
| H  | -1.047876 | 17.008667 | 11.257104 | H | 0.861174  | 17.452172 | 7.801148  |
| H  | 0.459476  | 17.598539 | 4.672220  | H | 5.975250  | 17.311759 | 9.567174  |
| H  | 7.805320  | 10.534751 | 10.085696 | H | 0.042877  | 9.914077  | 5.824967  |
| H  | 4.686960  | 15.913908 | 12.823155 | H | 4.392701  | 17.531396 | 8.804206  |
| H  | 1.026051  | 16.277454 | 3.632767  | H | 0.131065  | 8.690803  | 9.997694  |
| H  | -0.323867 | 16.012120 | 4.750249  | H | 1.230054  | 11.154020 | 12.651212 |
| H  | -2.164363 | 15.130073 | 10.814848 | H | 1.584161  | 10.252513 | 6.647574  |
| H  | -1.026359 | 13.728787 | 7.159867  | H | 1.517655  | 10.221211 | 4.885325  |
| H  | -1.442234 | 12.007064 | 7.268718  | H | -0.710432 | 10.189400 | 9.588554  |
| H  | 6.864175  | 11.700177 | 9.131284  | H | 0.660351  | 9.493020  | 12.389939 |

|   |           |           |           |
|---|-----------|-----------|-----------|
| H | 3.269653  | 15.477250 | 2.744726  |
| H | 2.104603  | 14.205363 | 2.336346  |
| H | -0.389449 | 10.869193 | 11.992380 |
| H | 5.713104  | 14.855243 | 4.621873  |
| H | 6.064724  | 13.177665 | 5.051476  |
| H | 2.749132  | 11.259387 | 3.080917  |
| H | 3.729880  | 14.183079 | 1.625193  |
| H | 4.028678  | 10.867565 | 4.247197  |
| H | 6.192721  | 13.701365 | 3.356436  |
| H | 4.450590  | 11.377924 | 2.597610  |
| H | 5.087895  | 16.230451 | 15.390108 |
| H | 6.242861  | 14.174834 | 16.499216 |
| H | 5.817387  | 13.375950 | 14.981437 |
| H | 5.338697  | 12.649534 | 16.526583 |
| H | 2.932601  | 12.691722 | 16.508247 |
| H | 0.803259  | 13.935706 | 16.354428 |
| H | 0.800979  | 16.333894 | 15.686991 |
| H | 2.960190  | 17.476103 | 15.213086 |
| H | 3.342786  | 16.714644 | 19.109004 |
| C | 0.800792  | 15.820783 | 19.527427 |
| H | 0.890490  | 16.759384 | 20.084972 |
| H | -0.035254 | 15.251176 | 19.944654 |
| H | 0.551180  | 16.078830 | 18.490854 |
| C | 2.085232  | 15.028731 | 19.577373 |
| C | 2.078492  | 13.654068 | 19.841558 |
| C | 3.265010  | 12.917752 | 19.856271 |
| C | 4.483569  | 13.549136 | 19.607406 |
| C | 4.503970  | 14.920212 | 19.343190 |
| C | 3.316904  | 15.649888 | 19.329462 |

|             |           |           |           |
|-------------|-----------|-----------|-----------|
| H           | 1.132092  | 13.153229 | 20.034909 |
| H           | 3.235170  | 11.851054 | 20.063419 |
| H           | 5.408670  | 12.979258 | 19.614982 |
| H           | 5.446773  | 15.420356 | 19.137515 |
| <b>Ts_d</b> |           |           |           |
| C           | 3.859028  | 14.656357 | 15.955495 |
| C           | 4.311784  | 13.327779 | 15.839350 |
| C           | 3.488494  | 12.218283 | 16.086779 |
| C           | 2.196905  | 12.462630 | 16.561869 |
| C           | 1.733319  | 13.762423 | 16.725226 |
| C           | 2.546136  | 14.846099 | 16.394227 |
| C           | 3.955983  | 10.796846 | 15.806634 |
| C           | 3.008096  | 10.115412 | 14.800764 |
| N           | 5.712227  | 13.077830 | 15.635741 |
| C           | 6.513099  | 12.698688 | 16.716873 |
| C           | 7.769496  | 12.543339 | 16.257452 |
| N           | 7.755356  | 12.812883 | 14.888188 |
| C           | 6.466983  | 13.144541 | 14.460158 |
| C           | 8.954322  | 12.791771 | 14.095440 |
| C           | 9.814209  | 13.901085 | 14.169382 |
| C           | 11.044457 | 13.810583 | 13.507794 |
| C           | 11.385244 | 12.668997 | 12.789655 |
| C           | 10.494382 | 11.600936 | 12.699117 |
| C           | 9.256802  | 11.637874 | 13.349380 |
| C           | 9.428133  | 15.158592 | 14.935438 |
| C           | 9.734206  | 16.437579 | 14.136782 |
| C           | 8.268106  | 10.483979 | 13.263188 |
| C           | 8.403874  | 9.674820  | 11.965579 |
| N           | 6.137031  | 13.451334 | 13.247715 |

|    |           |           |           |   |           |           |           |
|----|-----------|-----------|-----------|---|-----------|-----------|-----------|
| Si | 4.741435  | 13.338769 | 12.261032 | C | -3.278725 | 15.567812 | 12.370474 |
| Br | 1.845495  | 13.240906 | 12.389714 | C | -0.398870 | 16.477903 | 11.829679 |
| K  | 1.812861  | 10.276637 | 11.221899 | C | -1.153250 | 15.402397 | 14.593542 |
| C  | 4.770160  | 15.827588 | 15.605584 | C | -1.662531 | 9.696531  | 12.817066 |
| C  | 5.804001  | 16.124125 | 16.711867 | C | -3.650916 | 11.789101 | 13.834413 |
| C  | 10.113124 | 15.212477 | 16.316185 | C | 4.370717  | 14.475453 | 6.835049  |
| C  | 4.095254  | 9.958104  | 17.088197 | C | 2.859434  | 12.505807 | 8.629882  |
| C  | 8.381979  | 9.550698  | 14.486575 | H | -2.031476 | 14.949145 | 9.138068  |
| Br | 4.943385  | 10.957662 | 11.452057 | H | -1.850393 | 13.831134 | 7.772979  |
| Si | 5.279589  | 14.535562 | 10.237893 | H | -0.424081 | 14.370064 | 8.682824  |
| Si | 3.634325  | 14.235576 | 8.566722  | H | -0.933563 | 10.196289 | 9.703370  |
| C  | 2.205451  | 15.465780 | 8.725639  | H | 0.207946  | 11.298153 | 8.875601  |
| Si | 7.400076  | 14.005279 | 9.344150  | H | -1.340507 | 10.894670 | 8.135847  |
| C  | 8.709034  | 14.157586 | 10.690714 | H | -3.722079 | 11.250046 | 10.539037 |
| C  | 7.915984  | 15.162446 | 7.928445  | H | -3.922679 | 12.055545 | 8.971713  |
| C  | 7.390825  | 12.235148 | 8.668725  | H | -4.111957 | 12.976376 | 10.478869 |
| Si | 5.205703  | 16.801762 | 10.885514 | H | -3.791416 | 12.757430 | 14.329069 |
| C  | 3.525477  | 17.181659 | 11.672768 | H | -4.066283 | 11.012718 | 14.491845 |
| C  | 6.572586  | 17.162422 | 12.146651 | H | -4.233055 | 11.800284 | 12.907763 |
| C  | 5.439001  | 17.989403 | 9.423684  | H | -1.060953 | 12.386675 | 15.728438 |
| C  | 3.994967  | 17.113064 | 15.283386 | H | 0.129142  | 11.267844 | 15.069148 |
| Si | -0.810019 | 13.034194 | 12.082139 | H | -1.347791 | 10.635798 | 15.835267 |
| Si | -1.806819 | 11.464593 | 13.518299 | H | -2.078534 | 9.611065  | 11.806919 |
| C  | -0.943805 | 11.435145 | 15.199760 | H | -2.203757 | 8.990350  | 13.460479 |
| Si | -1.682630 | 12.600890 | 9.937483  | H | -0.618471 | 9.354655  | 12.787020 |
| C  | -0.849305 | 11.106429 | 9.094878  | H | -0.117556 | 15.147550 | 14.843166 |
| C  | -1.473995 | 14.078352 | 8.774461  | H | -1.812746 | 14.756250 | 15.184990 |
| C  | -3.535767 | 12.181706 | 9.992522  | H | -1.337212 | 16.441215 | 14.898371 |
| Si | -1.452972 | 15.192968 | 12.733828 | H | -3.943383 | 14.852672 | 12.867428 |

|   |           |           |           |   |           |           |           |
|---|-----------|-----------|-----------|---|-----------|-----------|-----------|
| H | -3.483485 | 15.521963 | 11.294579 | H | 12.343427 | 12.617164 | 12.279092 |
| H | -3.541201 | 16.575747 | 12.719578 | H | 9.377645  | 9.093734  | 14.530714 |
| H | -0.665594 | 17.491621 | 12.157092 | H | 0.724143  | 13.936222 | 17.088183 |
| H | -0.537499 | 16.425846 | 10.744082 | H | 7.638951  | 8.747466  | 14.415136 |
| H | 0.664029  | 16.319807 | 12.038262 | H | 4.688276  | 17.818324 | 8.643394  |
| H | 9.801831  | 16.112548 | 16.859063 | H | 7.264024  | 10.921593 | 13.262474 |
| H | 9.855499  | 14.342332 | 16.926739 | H | 6.602150  | 16.399117 | 12.931356 |
| H | 4.420159  | 8.940238  | 16.843130 | H | 8.393495  | 11.951437 | 8.322261  |
| H | 4.828065  | 10.400127 | 17.768419 | H | 6.427620  | 17.876042 | 8.965310  |
| H | 11.202684 | 15.240261 | 16.201901 | H | 8.870946  | 15.207807 | 10.957622 |
| H | 3.137395  | 9.892685  | 17.617296 | H | 10.764655 | 10.730834 | 12.109353 |
| H | 8.679007  | 12.263768 | 16.762223 | H | 8.397863  | 13.632893 | 11.597585 |
| H | 6.099342  | 12.600254 | 17.706503 | H | 6.699881  | 12.136066 | 7.823144  |
| H | 9.303192  | 16.385790 | 13.134695 | H | 5.340467  | 19.029943 | 9.761775  |
| H | 8.346382  | 15.124339 | 15.099415 | H | 2.151714  | 15.852321 | 16.491689 |
| H | 9.308542  | 17.307000 | 14.649579 | H | 3.195631  | 16.934773 | 14.560264 |
| H | 3.431791  | 9.159747  | 14.471735 | H | 5.319618  | 15.534192 | 14.702186 |
| H | 4.940425  | 10.854771 | 15.332405 | H | 7.074704  | 11.525473 | 9.439949  |
| H | 1.544808  | 11.626478 | 16.794930 | H | 9.332845  | 9.092419  | 11.945642 |
| H | 11.736480 | 14.646925 | 13.546635 | H | 9.668774  | 13.741736 | 10.360133 |
| H | 8.898054  | 14.851758 | 7.545634  | H | 7.566729  | 8.974542  | 11.884298 |
| H | 2.026957  | 9.920194  | 15.248986 | H | 3.556978  | 18.132628 | 12.219412 |
| H | 8.208385  | 10.089523 | 15.422554 | H | 8.381745  | 10.327110 | 11.087906 |
| H | 7.208964  | 15.150033 | 7.093167  | H | 3.551488  | 17.547078 | 16.187332 |
| H | 8.007565  | 16.197360 | 8.277438  | H | 6.399078  | 15.246136 | 16.973393 |
| H | 10.813274 | 16.603247 | 14.041531 | H | 3.226271  | 16.392584 | 12.370323 |
| H | 7.552849  | 17.169666 | 11.657344 | H | 2.744310  | 17.257060 | 10.910038 |
| H | 6.424290  | 18.142877 | 12.617920 | H | 4.678074  | 17.856106 | 14.859736 |
| H | 2.873876  | 10.766733 | 13.931532 | H | 5.293999  | 16.472259 | 17.616825 |



H 5.163378 13.750253 6.620843  
H 4.792503 15.480097 6.716419  
H 6.486181 16.915021 16.379384  
H 3.616235 11.715321 8.676880  
H 2.244748 12.465594 9.537166  
H 2.550862 16.502553 8.652756  
H 3.584318 14.348987 6.078525  
H 1.684472 15.346326 9.680950  
H 2.212220 12.335927 7.760187  
H 1.484260 15.299998 7.914673  
H 5.019855 13.666744 22.942627  
C 6.837828 11.962485 24.064398  
H 5.996680 11.567973 23.487896  
H 6.724454 11.633632 25.104822  
H 7.757983 11.509615 23.677837  
C 6.897128 13.468889 23.976283  
C 7.994054 14.174314 24.493164  
C 8.056924 15.565132 24.411380  
C 7.019304 16.279527 23.806091  
C 5.923632 15.589311 23.287550  
C 5.865522 14.197042 23.373826  
H 8.810076 13.626081 24.960084  
H 8.918034 16.091975 24.814536  
H 7.068710 17.362761 23.736259  
H 5.116649 16.131511 22.802112  
H 7.512241 11.591395 20.709456  
C 8.263532 14.214504 20.483279  
H 9.048730 13.452238 20.489673  
H 8.277869 14.721459 21.455968

H 8.507948 14.957055 19.715957  
C 6.907005 13.603162 20.238319  
C 5.822426 14.405301 19.860031  
C 4.556155 13.859409 19.658153  
C 4.345304 12.491958 19.848572  
C 5.414379 11.680981 20.232906  
C 6.684279 12.232983 20.416127  
H 5.977703 15.471301 19.718670  
H 3.736209 14.493746 19.334098  
H 3.362701 12.063032 19.677147  
H 5.264070 10.614276 20.377962  
**Int\_e**  
C 4.034474 15.515038 15.611714  
C 4.270660 14.147614 15.800824  
C 3.193660 13.337124 16.180668  
C 1.916636 13.871566 16.355530  
C 1.693745 15.234293 16.151296  
C 2.759289 16.055058 15.776709  
C 5.638480 13.561108 15.558372  
C 2.691175 13.705365 12.721869  
C 2.991875 12.399062 12.569406  
N 3.042140 12.131953 11.194459  
C 2.789823 13.293679 10.474211  
N 2.567624 14.261658 11.445998  
C 3.320112 10.847414 10.614114  
C 2.233319 10.020118 10.265218  
C 2.532457 8.758496 9.742097  
C 3.853776 8.345603 9.574705  
C 4.905181 9.190043 9.914887

|    |           |           |           |   |           |           |           |
|----|-----------|-----------|-----------|---|-----------|-----------|-----------|
| C  | 4.660488  | 10.466418 | 10.437359 | C | 3.188723  | 14.366552 | 2.526617  |
| C  | 0.794423  | 10.489230 | 10.454567 | C | 0.610274  | 16.255421 | 7.599606  |
| C  | -0.206896 | 9.764562  | 9.542243  | C | 0.186971  | 16.072167 | 4.572573  |
| C  | 5.810141  | 11.383274 | 10.829638 | C | 1.744059  | 10.462716 | 6.285368  |
| C  | 6.409726  | 10.945730 | 12.182003 | C | -0.478978 | 12.463135 | 7.058723  |
| C  | 2.089777  | 15.590752 | 11.189443 | H | -1.595168 | 14.178628 | 13.343123 |
| C  | 0.715665  | 15.836859 | 11.345023 | H | -0.158680 | 15.086257 | 13.862076 |
| C  | 0.268309  | 17.148594 | 11.146381 | H | 7.213054  | 11.628639 | 12.481051 |
| C  | 1.155858  | 18.158312 | 10.790358 | H | 5.650964  | 10.941462 | 12.971392 |
| C  | 2.511694  | 17.879526 | 10.621874 | H | -1.501219 | 15.927879 | 13.064241 |
| C  | 3.010508  | 16.588746 | 10.821427 | H | 6.828401  | 9.935230  | 12.108828 |
| N  | 2.747645  | 13.448216 | 9.185838  | H | 2.547741  | 14.302146 | 13.607095 |
| Si | 3.903473  | 13.629933 | 7.961715  | H | 3.179370  | 11.628015 | 13.297338 |
| Si | 2.533315  | 13.822664 | 5.968189  | H | -0.857663 | 14.307678 | 9.652811  |
| Si | 0.926686  | 12.113821 | 5.838677  | H | 0.288385  | 13.793570 | 11.790187 |
| C  | 0.186118  | 11.942871 | 4.099956  | H | -1.997708 | 13.712362 | 10.877107 |
| C  | -0.267454 | 14.732362 | 11.709093 | H | 7.667146  | 12.181674 | 10.046264 |
| C  | -0.918926 | 14.999567 | 13.079121 | H | 5.403653  | 12.392832 | 10.953349 |
| C  | 4.493879  | 16.271757 | 10.698029 | H | 5.928869  | 8.859088  | 9.767148  |
| C  | 5.174416  | 16.352286 | 12.080079 | H | -0.788936 | 17.375409 | 11.256657 |
| C  | 6.899711  | 11.459408 | 9.746833  | H | -0.251271 | 17.079599 | 4.561183  |
| C  | -1.329423 | 14.539101 | 10.611154 | H | 7.393276  | 10.492092 | 9.600039  |
| C  | 5.222842  | 17.154017 | 9.675024  | H | 4.703829  | 15.668588 | 12.792773 |
| C  | 0.337944  | 10.346229 | 11.922540 | H | 0.621528  | 15.879832 | 3.585598  |
| Si | 3.982952  | 13.693759 | 4.112886  | H | -0.627208 | 15.353699 | 4.725006  |
| C  | 5.566171  | 14.685069 | 4.442798  | H | -1.939543 | 15.440332 | 10.482536 |
| Si | 1.480518  | 15.934554 | 5.954806  | H | -1.024115 | 13.372954 | 6.781263  |
| C  | 2.767905  | 17.302622 | 5.689082  | H | -1.197466 | 11.634151 | 7.087669  |
| C  | 4.492281  | 11.894892 | 3.784807  | H | 6.474812  | 11.788382 | 8.793524  |

|   |           |           |           |   |           |           |           |
|---|-----------|-----------|-----------|---|-----------|-----------|-----------|
| H | 0.789893  | 19.168961 | 10.630299 | H | 2.960035  | 15.434593 | 2.619022  |
| H | 5.101820  | 17.368237 | 12.486218 | H | 2.253219  | 13.844679 | 2.294074  |
| H | 4.061958  | 7.360775  | 9.164694  | H | -0.695558 | 10.696623 | 12.027132 |
| H | 6.234668  | 16.087495 | 11.998278 | H | 5.349856  | 15.746709 | 4.607827  |
| H | 0.956554  | 11.683258 | 3.364900  | H | 6.085882  | 14.310881 | 5.332949  |
| H | 4.581341  | 15.236956 | 10.345429 | H | 3.630119  | 11.278824 | 3.503663  |
| H | -0.076120 | 12.606684 | 8.066770  | H | 3.868880  | 14.240514 | 1.673594  |
| H | 2.288422  | 18.289686 | 5.731473  | H | 4.950871  | 11.442830 | 4.672240  |
| H | -0.286049 | 12.875738 | 3.772167  | H | 6.252623  | 14.607892 | 3.589025  |
| H | -0.230299 | 15.568017 | 7.740218  | H | 5.221258  | 11.845686 | 2.964776  |
| H | 3.187698  | 18.676995 | 10.330713 | H | 4.860320  | 16.163991 | 15.331910 |
| H | 1.288809  | 16.121023 | 8.447137  | H | 6.425591  | 14.262327 | 15.849925 |
| H | 3.260756  | 17.209358 | 4.714581  | H | 5.770747  | 13.330975 | 14.492708 |
| H | -0.575760 | 11.151378 | 4.082543  | H | 5.778250  | 12.633522 | 16.121324 |
| H | 1.727270  | 8.092556  | 9.450243  | H | 3.359023  | 12.274113 | 16.343693 |
| H | 0.107323  | 9.787202  | 8.496623  | H | 1.095444  | 13.223612 | 16.650415 |
| H | 0.768689  | 11.554869 | 10.194898 | H | 0.700510  | 15.653232 | 16.285482 |
| H | 3.545972  | 17.272297 | 6.460803  | H | 2.597104  | 17.117643 | 15.616250 |
| H | 5.285083  | 18.197077 | 10.005503 | H | 7.212378  | 16.381175 | 18.465105 |
| H | 0.218068  | 17.280066 | 7.636068  | C | 4.988345  | 17.971784 | 18.421446 |
| H | 6.245513  | 16.787871 | 9.537973  | H | 5.957559  | 18.474497 | 18.493190 |
| H | 1.023325  | 9.635771  | 6.229345  | H | 4.273364  | 18.505443 | 19.056142 |
| H | 4.720829  | 17.129071 | 8.702456  | H | 4.638628  | 18.068031 | 17.385238 |
| H | -0.336954 | 8.718540  | 9.842901  | C | 5.090884  | 16.516719 | 18.811224 |
| H | 0.961442  | 10.929224 | 12.604357 | C | 3.951776  | 15.797620 | 19.197188 |
| H | 2.160160  | 10.485810 | 7.298621  | C | 4.031351  | 14.442929 | 19.513551 |
| H | 2.564513  | 10.236883 | 5.594818  | C | 5.258152  | 13.778930 | 19.455372 |
| H | -1.184546 | 10.251977 | 9.615526  | C | 6.401636  | 14.483603 | 19.079559 |
| H | 0.375696  | 9.295100  | 12.230674 | C | 6.315533  | 15.840031 | 18.760029 |

|             |           |           |           |    |           |           |           |
|-------------|-----------|-----------|-----------|----|-----------|-----------|-----------|
| H           | 2.989171  | 16.302287 | 19.233418 | C  | 10.252232 | 10.271490 | 19.544634 |
| H           | 3.132425  | 13.902097 | 19.796775 | C  | 11.535651 | 10.502104 | 20.120757 |
| H           | 5.320931  | 12.721875 | 19.699531 | C  | 12.540740 | 11.216404 | 19.513252 |
| H           | 7.362591  | 13.977562 | 19.031775 | C  | 12.646644 | 11.546094 | 18.122934 |
| <b>Ts_f</b> |           |           |           | C  | 13.208101 | 12.909586 | 17.731101 |
| C           | 11.026783 | 12.247271 | 11.767567 | C  | 12.630267 | 14.059631 | 18.569874 |
| C           | 11.766421 | 12.710688 | 12.872937 | C  | 15.346028 | 13.775530 | 13.752754 |
| C           | 13.047701 | 13.277464 | 12.746874 | C  | 8.798353  | 11.532073 | 10.718447 |
| C           | 13.567777 | 13.414766 | 11.455095 | Si | 11.345588 | 6.693023  | 16.646185 |
| C           | 12.841522 | 13.002211 | 10.340835 | C  | 10.163571 | 7.535033  | 15.432831 |
| C           | 11.588654 | 12.415061 | 10.497497 | Si | 14.589277 | 8.013926  | 14.896416 |
| N           | 11.173688 | 12.605631 | 14.178373 | C  | 13.480716 | 8.007365  | 13.367641 |
| C           | 11.544042 | 11.701952 | 15.153791 | C  | 10.493470 | 6.513030  | 18.324085 |
| N           | 10.620215 | 11.864147 | 16.191215 | C  | 11.789554 | 4.975526  | 15.983087 |
| C           | 9.731448  | 12.896373 | 15.867096 | C  | 7.660587  | 11.868117 | 18.673806 |
| C           | 10.057802 | 13.333524 | 14.627480 | C  | 14.747613 | 12.878117 | 17.768317 |
| C           | 10.885561 | 11.034635 | 17.325088 | C  | 15.684521 | 6.466389  | 14.857092 |
| Si          | 12.510013 | 10.204110 | 16.824064 | C  | 15.700156 | 9.542836  | 14.824530 |
| Si          | 13.286024 | 8.013837  | 16.885218 | C  | 15.106281 | 5.619213  | 18.590474 |
| Si          | 14.627385 | 7.446061  | 18.745504 | C  | 16.188007 | 8.516094  | 18.725103 |
| C           | 13.763638 | 7.666278  | 20.408711 | H  | 8.963154  | 13.237488 | 16.539351 |
| N           | 12.546780 | 10.869141 | 15.210211 | H  | 9.623099  | 14.110978 | 14.020115 |
| C           | 13.827528 | 13.726417 | 13.975268 | H  | 9.481825  | 9.889885  | 20.210940 |
| C           | 13.316708 | 15.083852 | 14.499376 | H  | 11.649944 | 10.261912 | 21.175840 |
| C           | 9.696773  | 11.530165 | 11.963078 | H  | 13.308390 | 11.646828 | 20.160718 |
| C           | 9.949568  | 10.082358 | 12.438400 | H  | 8.333807  | 10.974275 | 16.833012 |
| C           | 9.877995  | 10.685414 | 18.287300 | H  | 8.154500  | 12.838595 | 18.553278 |
| C           | 8.398189  | 10.753872 | 17.904746 | H  | 7.648202  | 11.640757 | 19.745471 |
| C           | 7.691976  | 9.401535  | 18.121143 | H  | 6.623721  | 11.961522 | 18.328590 |

|   |           |           |           |   |           |           |           |
|---|-----------|-----------|-----------|---|-----------|-----------|-----------|
| H | 8.182985  | 8.605861  | 17.554327 | H | 12.830325 | 7.095866  | 20.460006 |
| H | 6.647606  | 9.467162  | 17.794443 | H | 15.613399 | 5.398559  | 17.645986 |
| H | 7.694576  | 9.115613  | 19.178290 | H | 14.219649 | 4.977225  | 18.654027 |
| H | 12.918978 | 13.089914 | 16.689058 | H | 15.779758 | 5.340710  | 19.411659 |
| H | 15.134214 | 12.095760 | 17.106066 | H | 16.781727 | 8.344477  | 17.820557 |
| H | 15.110627 | 12.678504 | 18.783359 | H | 16.820105 | 8.289016  | 19.593300 |
| H | 15.161686 | 13.839538 | 17.443353 | H | 15.929305 | 9.580625  | 18.761813 |
| H | 12.919597 | 13.970513 | 19.622798 | H | 9.921057  | 8.552863  | 15.758928 |
| H | 11.535990 | 14.056380 | 18.520214 | H | 9.226226  | 6.968470  | 15.357775 |
| H | 12.990290 | 15.026176 | 18.198347 | H | 10.601924 | 7.604986  | 14.432377 |
| H | 11.044326 | 12.079344 | 9.620399  | H | 10.309077 | 7.495660  | 18.772586 |
| H | 13.260237 | 13.126272 | 9.345424  | H | 11.109481 | 5.931542  | 19.019789 |
| H | 14.551947 | 13.851015 | 11.317581 | H | 9.529884  | 5.997983  | 18.215486 |
| H | 9.150054  | 12.048254 | 12.759139 | H | 12.253267 | 5.039050  | 14.991960 |
| H | 9.221462  | 10.921464 | 9.912175  | H | 10.887374 | 4.356226  | 15.894073 |
| H | 8.639642  | 12.544749 | 10.334476 | H | 12.489954 | 4.457855  | 16.648305 |
| H | 7.821664  | 11.106283 | 10.972130 | H | 12.846228 | 8.899294  | 13.368276 |
| H | 10.464791 | 9.512223  | 11.656685 | H | 12.842220 | 7.117649  | 13.325038 |
| H | 9.000315  | 9.582478  | 12.662519 | H | 14.099111 | 8.022537  | 12.460078 |
| H | 10.571785 | 10.056827 | 13.336160 | H | 15.097373 | 5.547601  | 14.967492 |
| H | 13.648760 | 12.969951 | 14.746607 | H | 16.437911 | 6.484222  | 15.653202 |
| H | 15.634767 | 14.576586 | 13.061903 | H | 16.215765 | 6.414700  | 13.897346 |
| H | 15.722296 | 12.825929 | 13.358797 | H | 16.346135 | 9.492578  | 13.937629 |
| H | 15.846396 | 13.969585 | 14.707558 | H | 16.344365 | 9.630861  | 15.706515 |
| H | 13.485942 | 15.870928 | 13.755270 | H | 15.080730 | 10.442908 | 14.749919 |
| H | 13.851119 | 15.359387 | 15.416008 | H | 8.552976  | 17.291363 | 14.702906 |
| H | 12.247154 | 15.051773 | 14.723598 | C | 6.419153  | 15.925971 | 13.661648 |
| H | 13.521692 | 8.716821  | 20.591138 | H | 6.109199  | 14.890368 | 13.845109 |
| H | 14.424614 | 7.313788  | 21.211998 | H | 5.724971  | 16.348857 | 12.926064 |

|   |           |           |           |
|---|-----------|-----------|-----------|
| H | 6.310056  | 16.485583 | 14.595243 |
| C | 7.836995  | 15.986115 | 13.147476 |
| C | 8.202663  | 15.289235 | 11.987331 |
| C | 9.506413  | 15.342152 | 11.500695 |
| C | 10.478044 | 16.088042 | 12.169895 |
| C | 10.127677 | 16.792496 | 13.320300 |
| C | 8.817074  | 16.741350 | 13.802155 |
| H | 7.453257  | 14.707378 | 11.455994 |
| H | 9.772919  | 14.794748 | 10.602323 |
| H | 11.498114 | 16.108212 | 11.798976 |
| H | 10.875480 | 17.374509 | 13.852299 |
| H | 8.594235  | 16.944957 | 8.022744  |
| C | 10.079490 | 18.588408 | 9.621934  |
| H | 10.643467 | 17.769363 | 9.164684  |
| H | 10.515555 | 18.797716 | 10.603259 |
| H | 10.218744 | 19.478994 | 8.995471  |
| C | 8.615366  | 18.240597 | 9.743305  |
| C | 7.833151  | 18.776636 | 10.773412 |
| C | 6.476383  | 18.471262 | 10.878879 |
| C | 5.875626  | 17.615025 | 9.954986  |
| C | 6.644580  | 17.069660 | 8.925338  |
| C | 8.000347  | 17.382197 | 8.822894  |
| H | 5.890797  | 18.892832 | 11.691846 |
| H | 4.820112  | 17.370394 | 10.039499 |
| H | 6.189216  | 16.396518 | 8.203318  |
| H | 8.296986  | 19.426957 | 11.511446 |
